# Supplementary material
Source: PubMed Central journal article supplement (PMC10275292)

## Supporting Information

# Process Development and Scale-up Total Synthesis of Largazole, a Potent Class I Histone Deacetylase Inhibitor

*Qi-Yin Chen,<sup>†,‡,§</sup> Pravin Chaturvedi,<sup>§</sup> Hendrik Luesch,<sup>†,‡,§,\*</sup>*

<sup>†</sup>Department of Medicinal Chemistry and <sup>‡</sup>Center for Natural Products, Drug Discovery and Development (CNPD3), University of Florida, Gainesville, Florida, USA

<sup>§</sup>Oceanyx Pharmaceuticals, Inc., Sid Martin Biotechnology Incubator, 12085 Research Dr. Alachua, Florida, USA

\*Corresponding author. E-Mail: luesch@cop.ufl.edu

### Table of Contents

|                                                               |        |
|---------------------------------------------------------------|--------|
| 1. Selected analytical HPLC profiles ( <b>Figures S1–S6</b> ) | S2–S7  |
| 2. Picture of product largazole ( <b>Figure S7</b> )          | S8     |
| 3. NMR spectra ( <b>Figures S8–S41</b> )                      | S9–S42 |

**Figure S1.** Analytical HPLC profile of compound 2

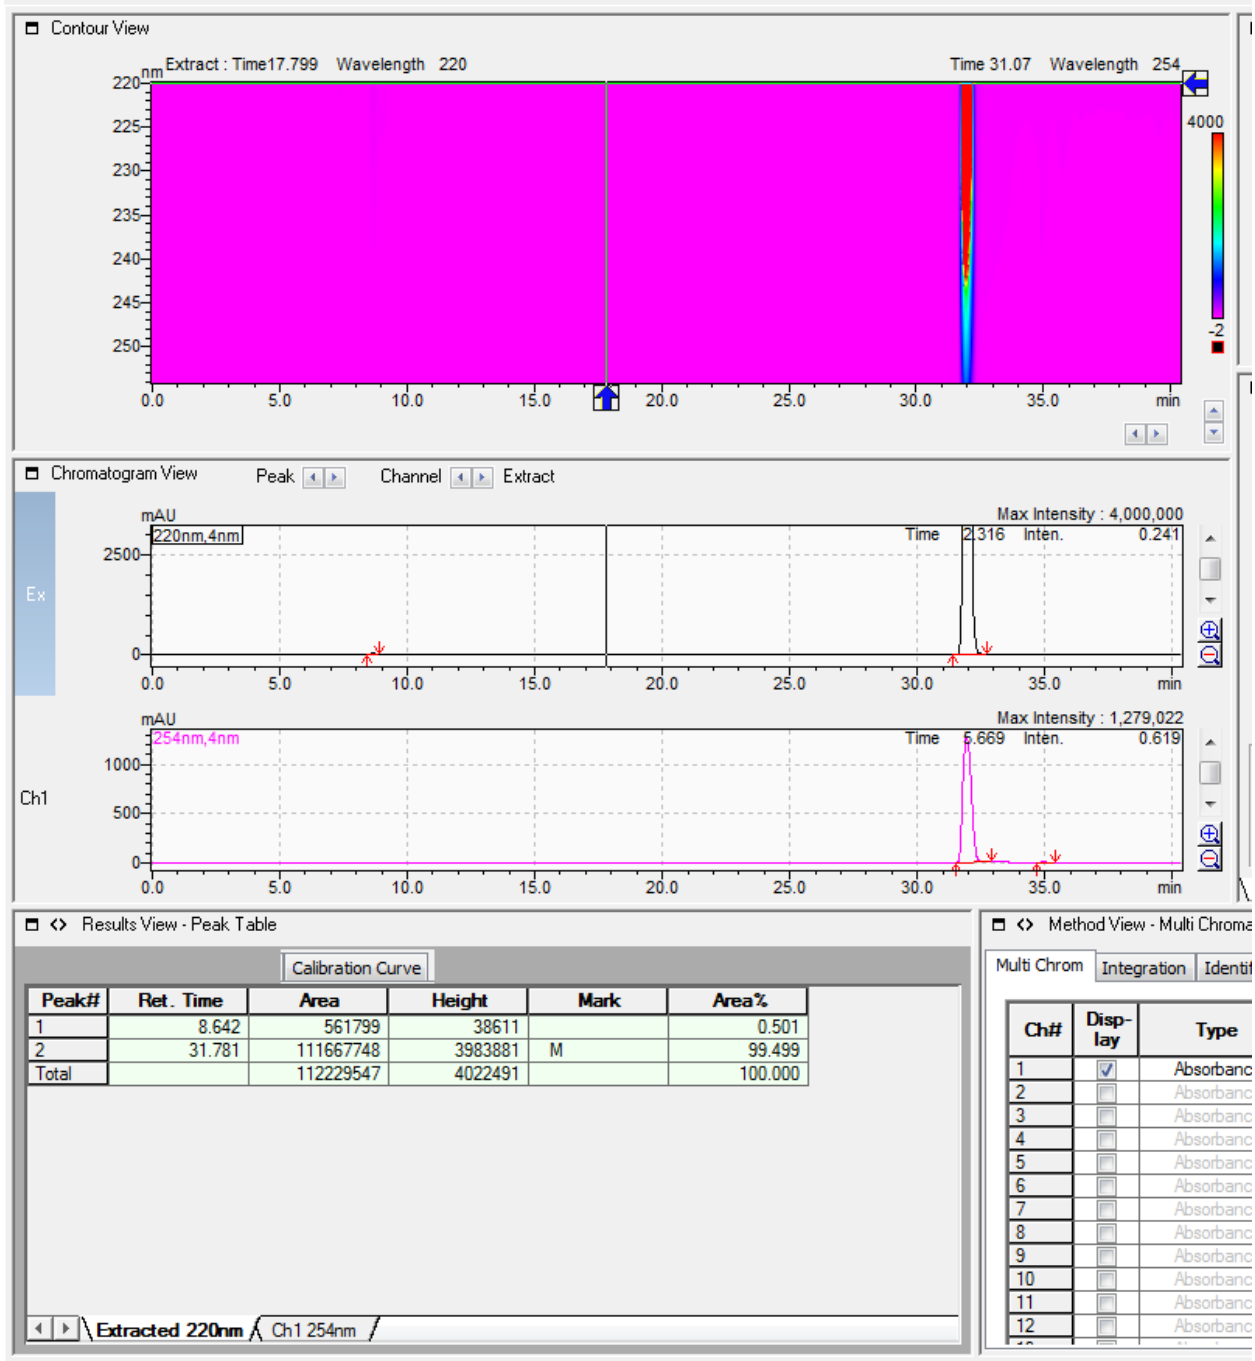

**Figure S2.** Analytical HPLC profile of compound **8**

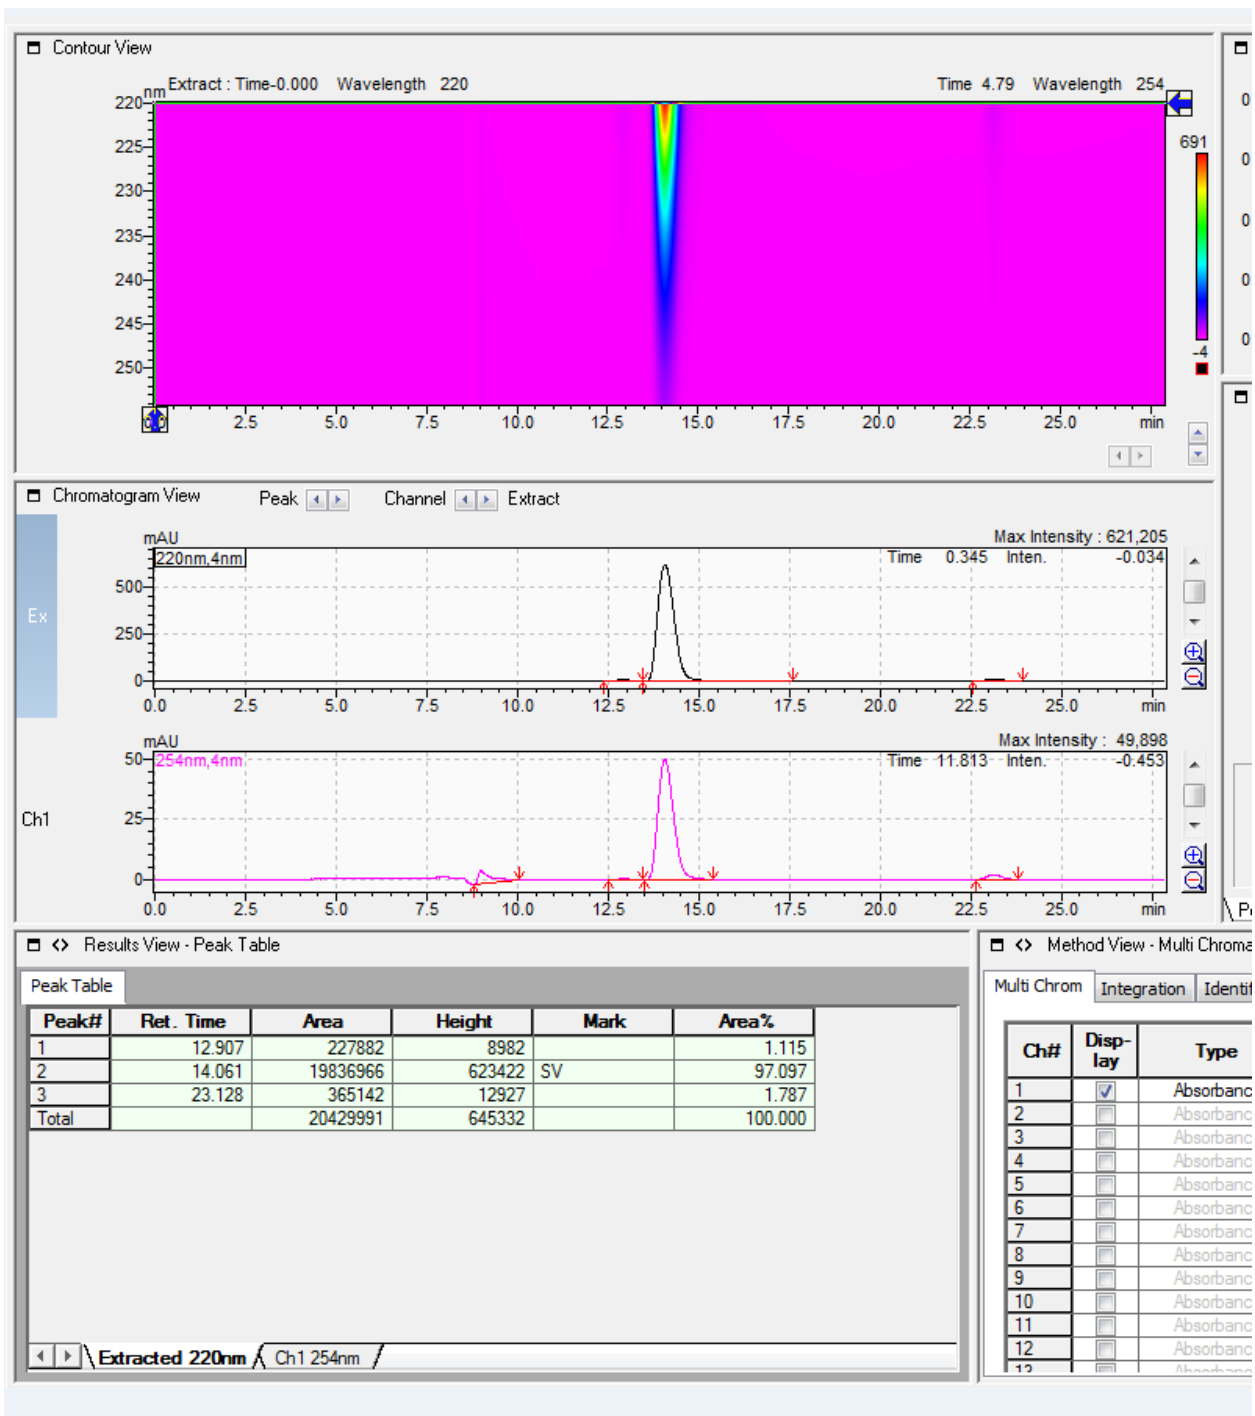

**Figure S3.** Analytical HPLC profile of compound 5

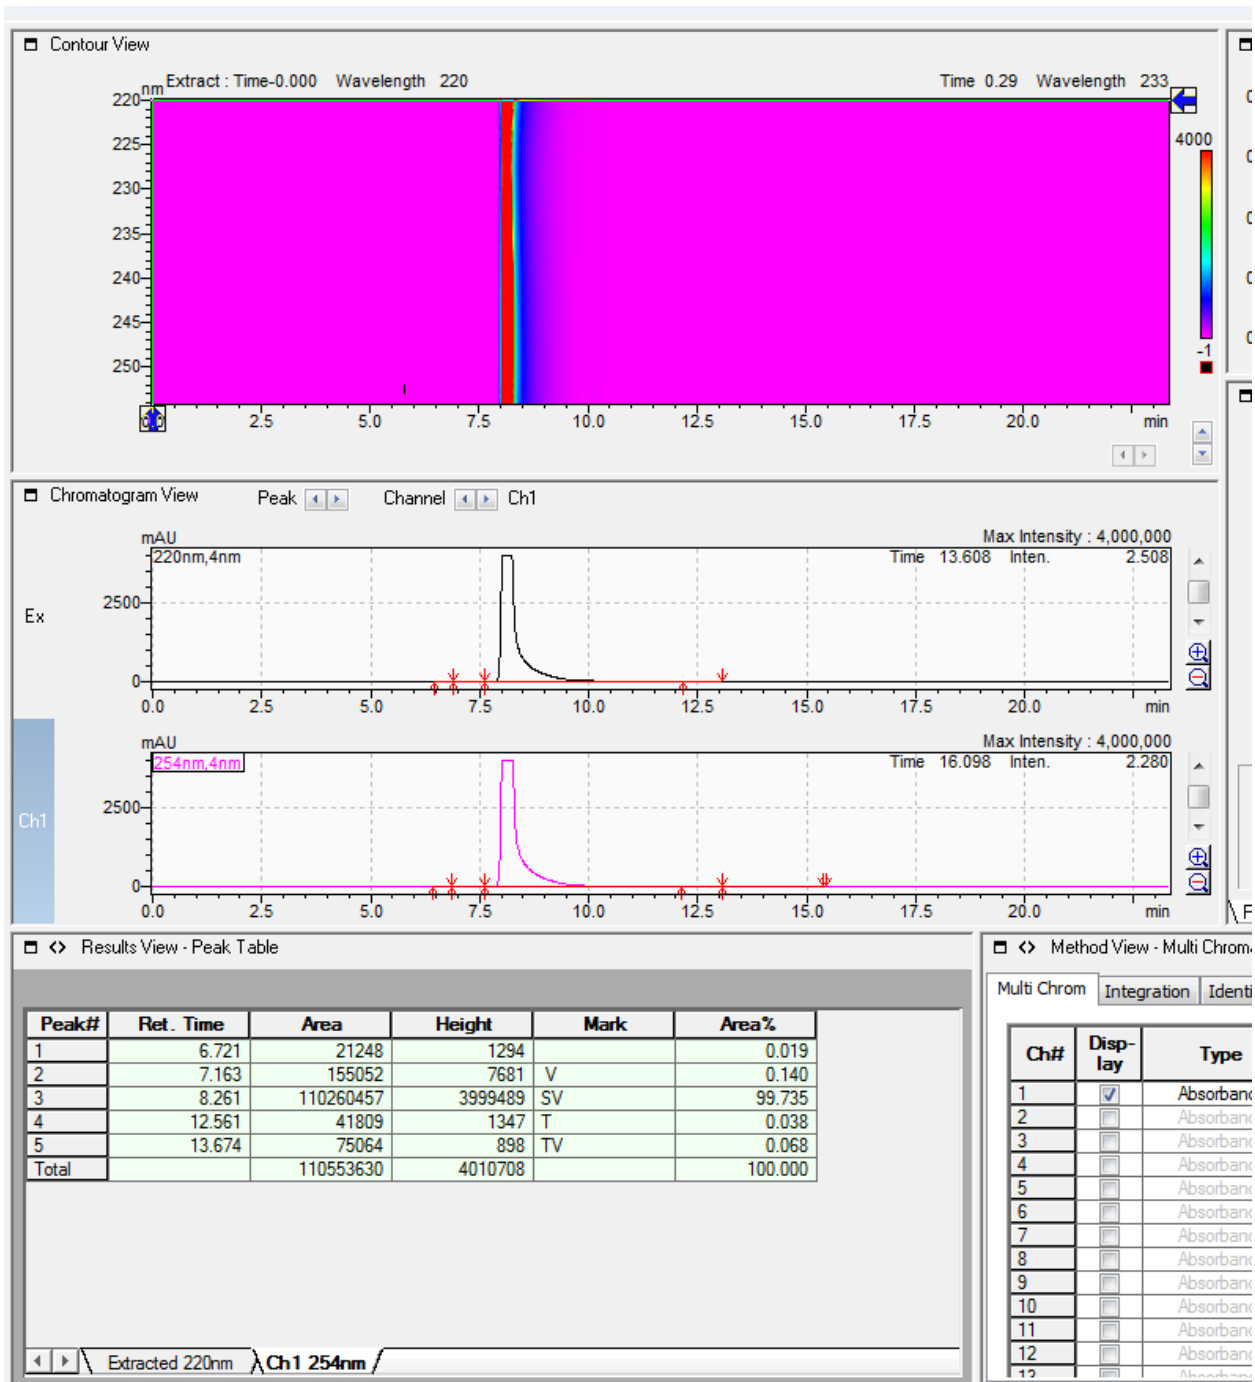

**Figure S4.** Analytical HPLC profile of compound **3**

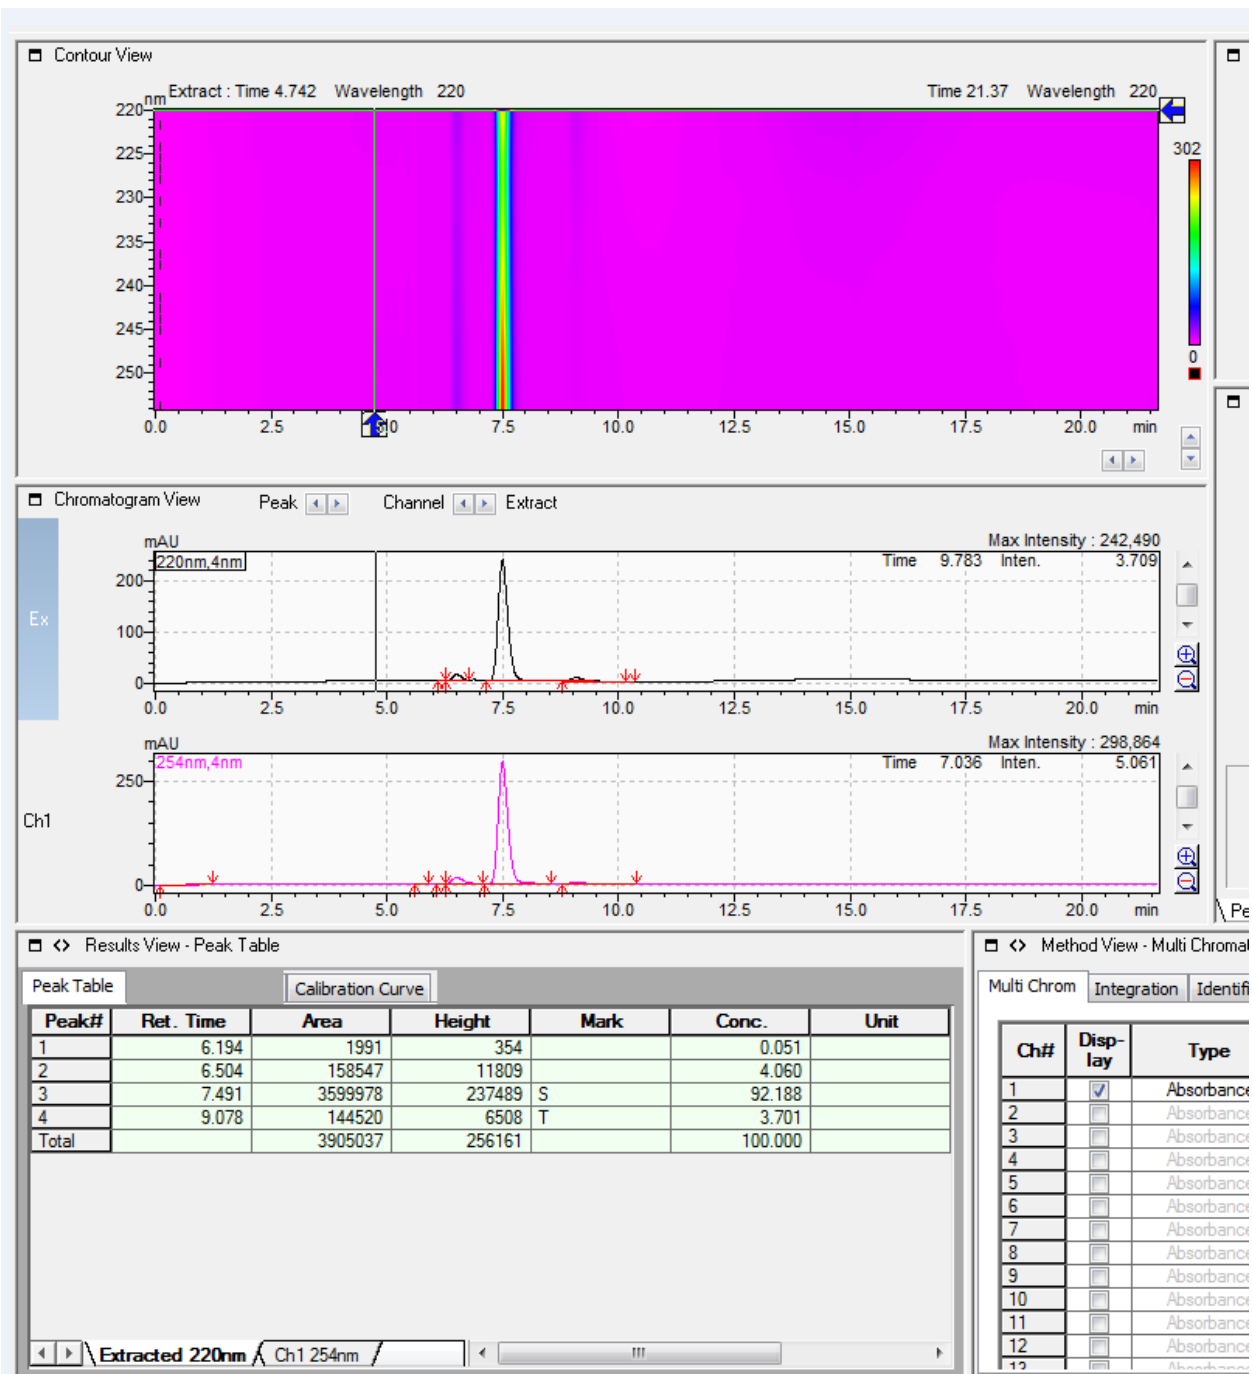

**Figure S5.** Analytical HPLC profile of compound 1 (fraction 1)

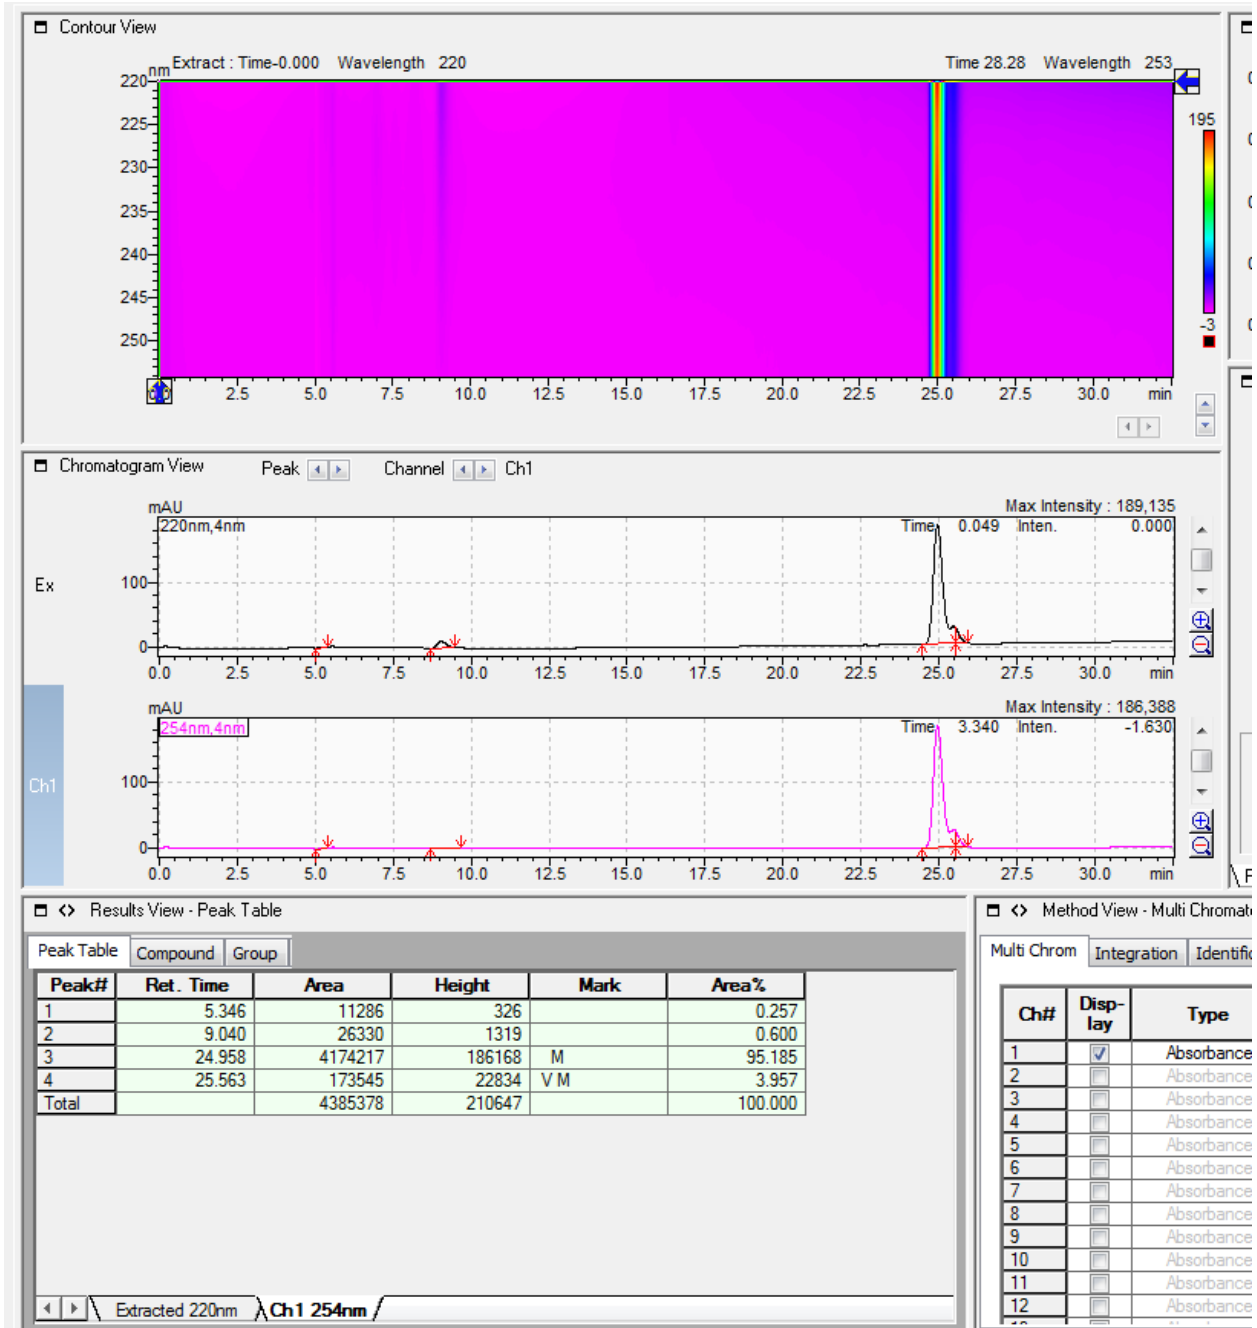

**Figure S6.** Analytical HPLC profile of compound **1** (fraction 2)

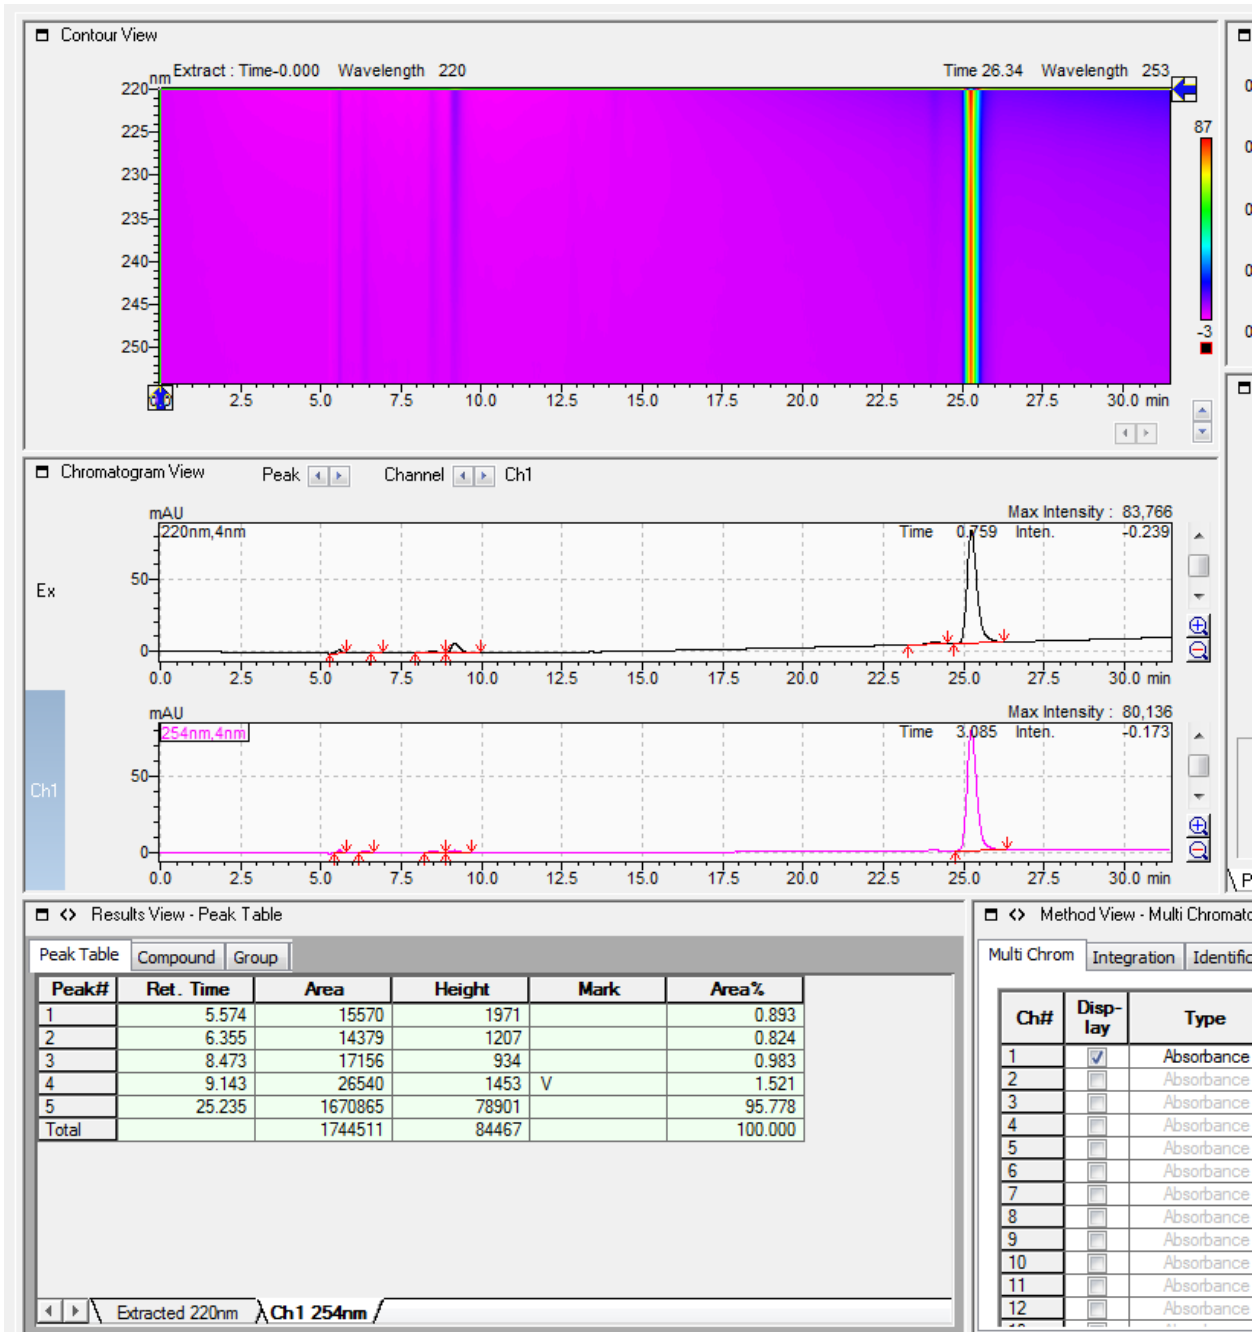

**Figure S7.** Picture of product largazole

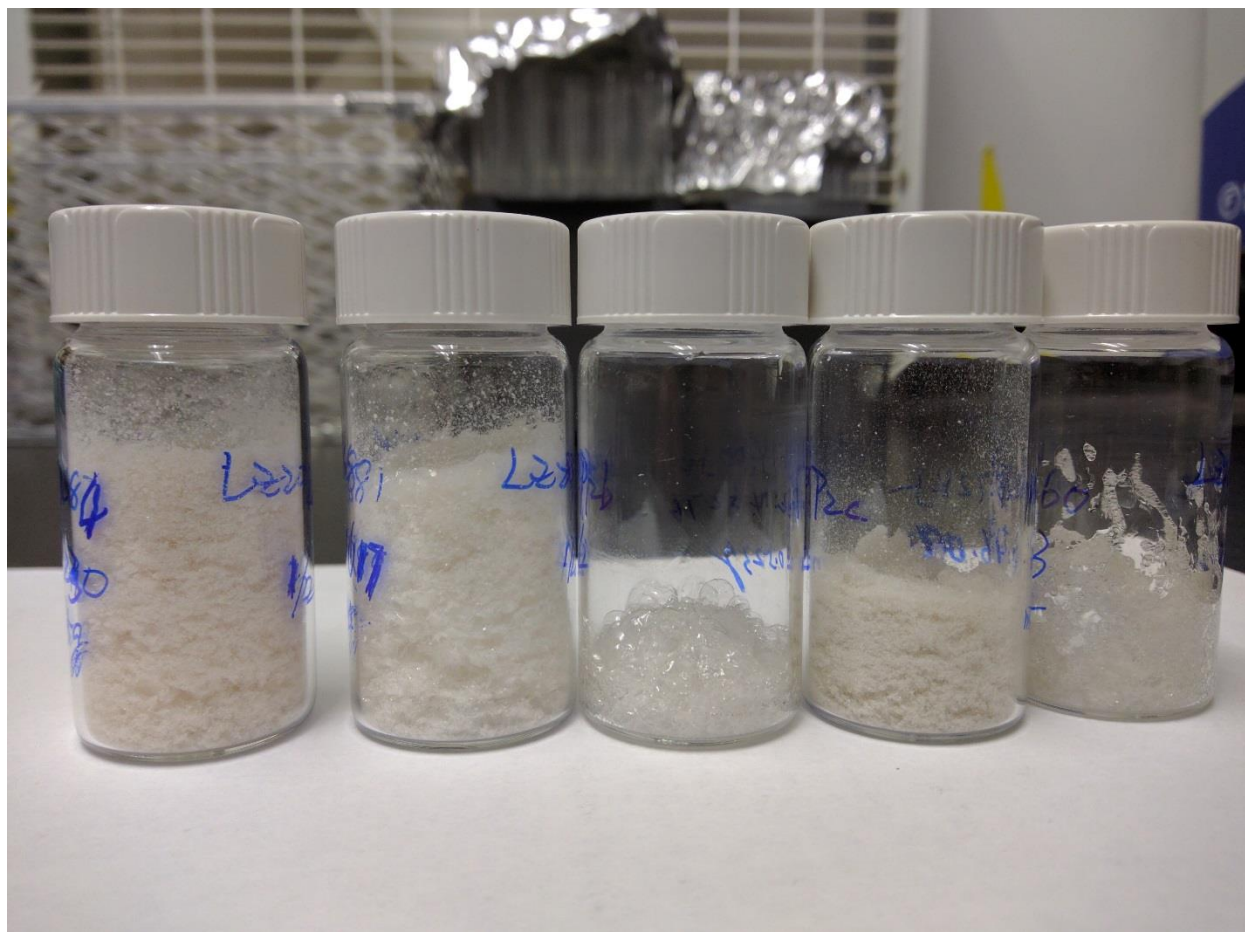



**Figure S8.**  $^1\text{H}$  NMR Spectrum of **2** in  $\text{CDCl}_3$  (400 MHz) at 25  $^\circ\text{C}$

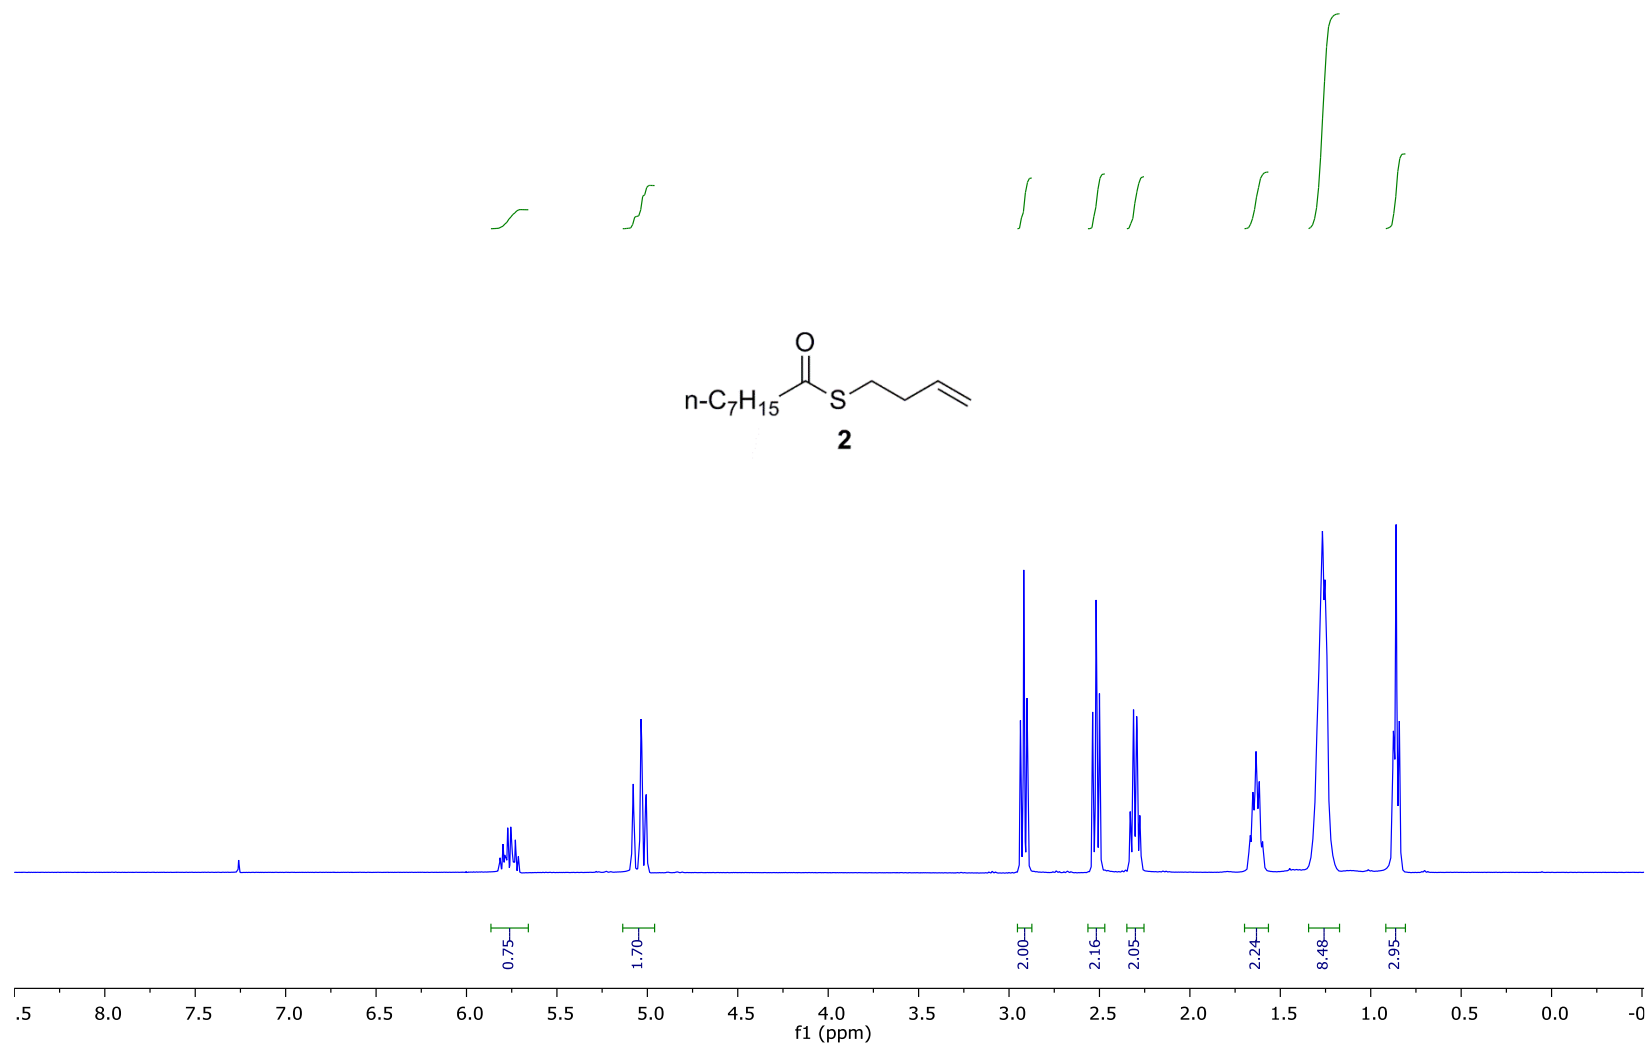

**Figure S9.**  $^{13}\text{C}$  NMR Spectrum of **2** in  $\text{CDCl}_3$  (100 MHz) at 25  $^\circ\text{C}$

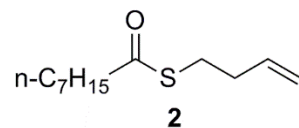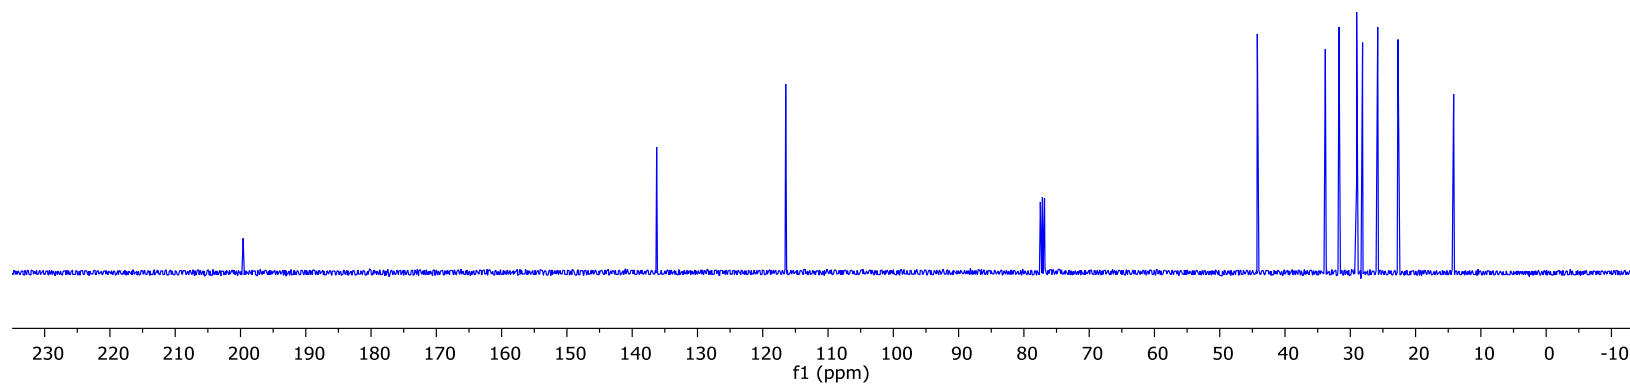

Figure S10.  $^1\text{H}$  NMR Spectrum of **18** in  $\text{CDCl}_3$  (400 MHz) at 25  $^\circ\text{C}$

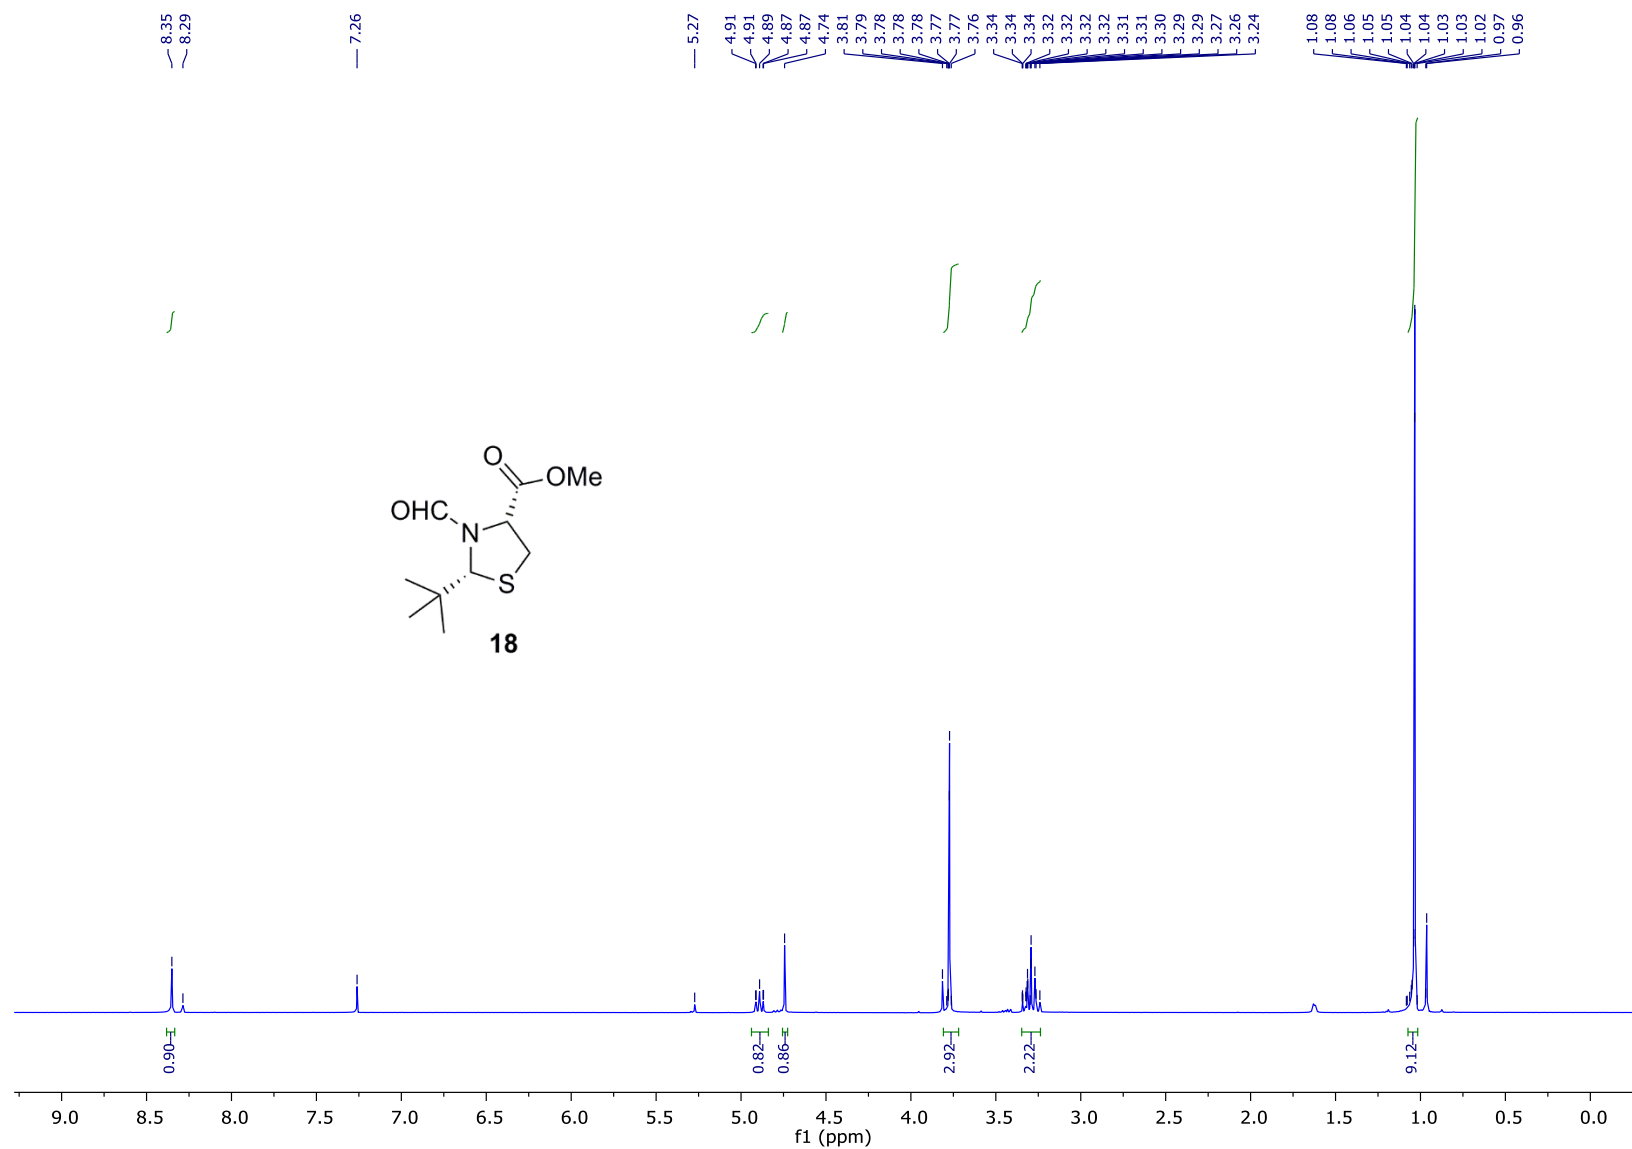

**Figure S11.**  $^{13}\text{C}$  NMR Spectrum of **18** in  $\text{CDCl}_3$  (100 MHz) at 25  $^\circ\text{C}$

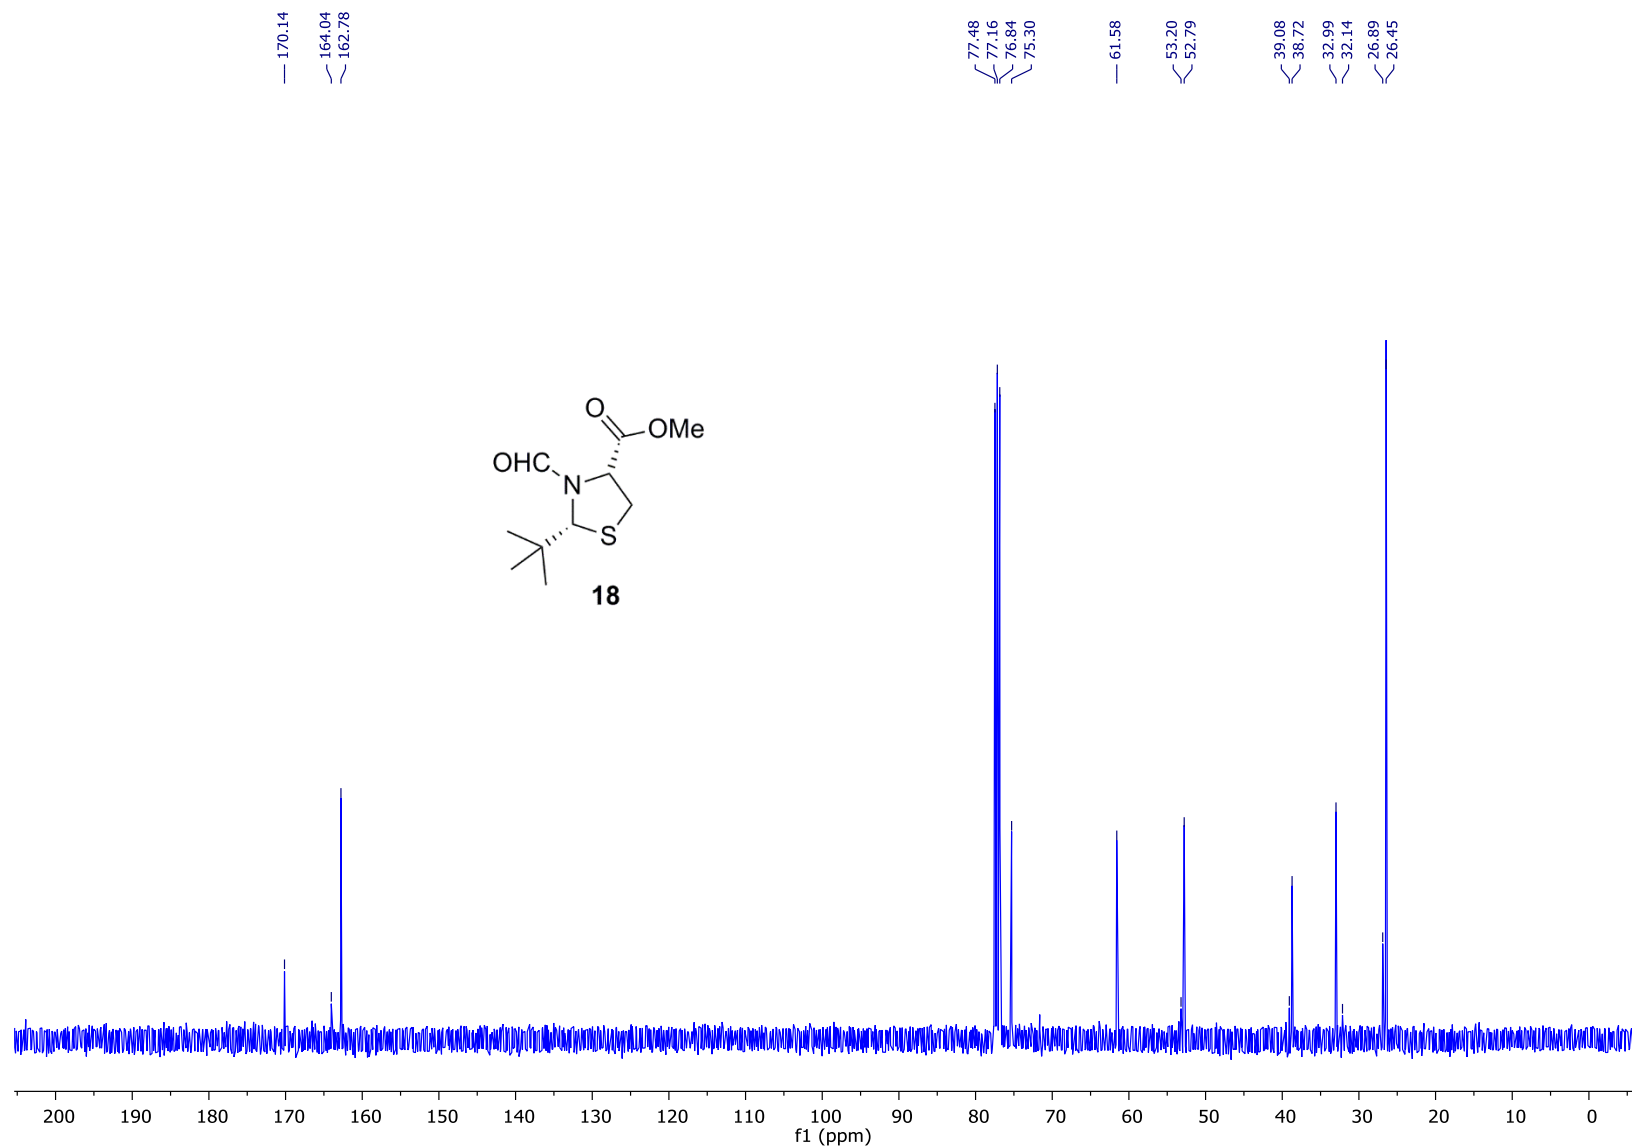

Figure S12.  $^1\text{H}$  NMR Spectrum of **20** in  $\text{CDCl}_3$  (400 MHz) at 25  $^\circ\text{C}$

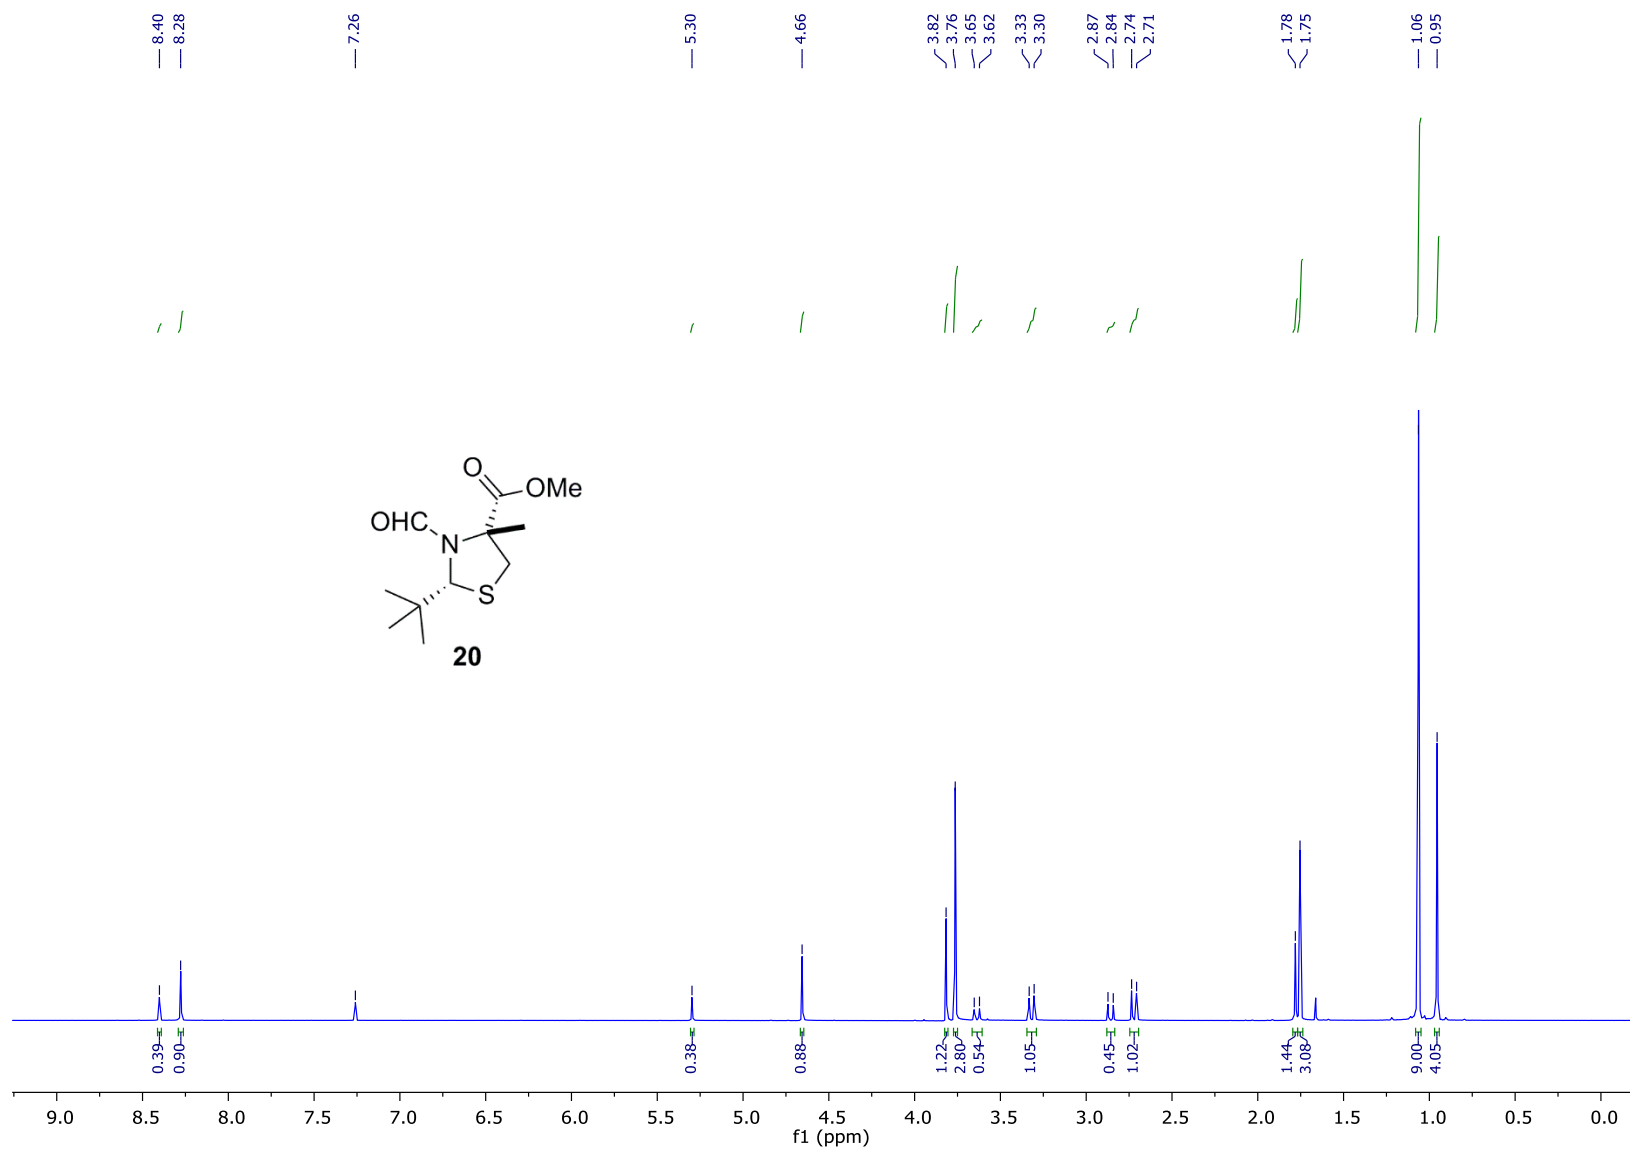

**Figure S13.**  $^{13}\text{C}$  NMR Spectrum of **20** in  $\text{CDCl}_3$  (100 MHz) at 25  $^\circ\text{C}$

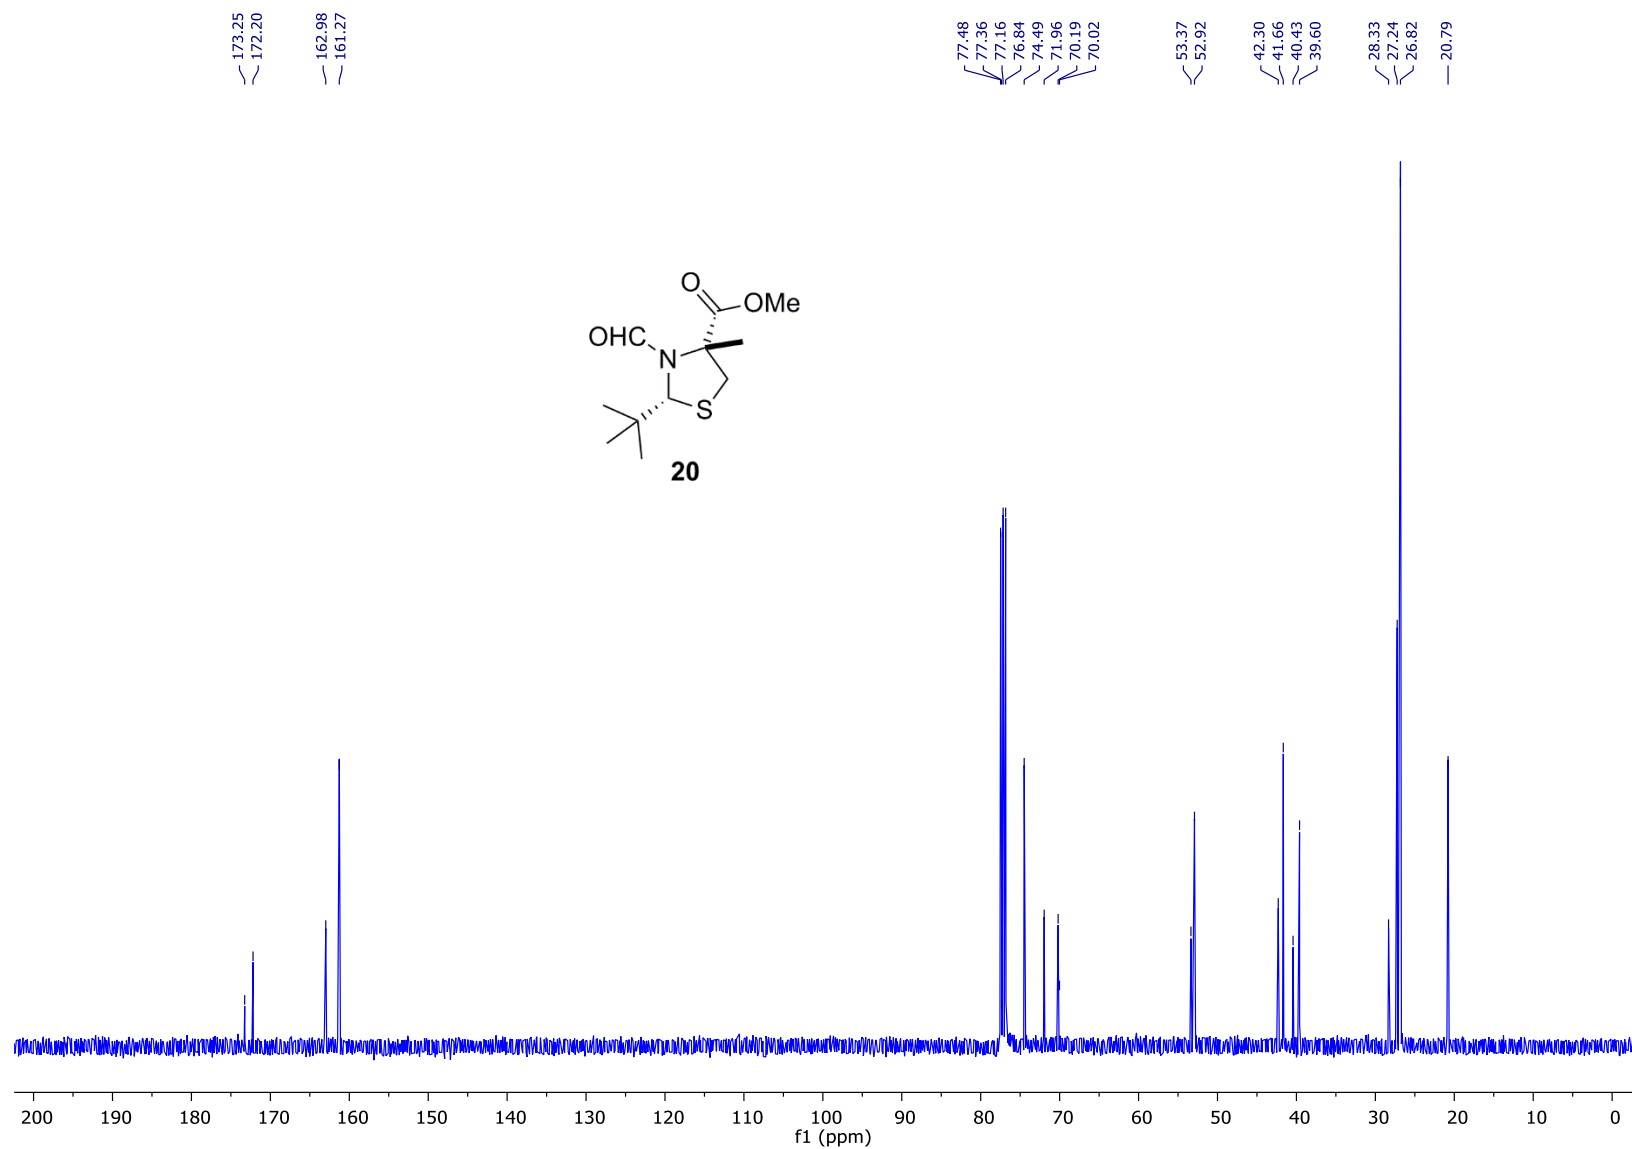

**Figure S14.**  $^1\text{H}$  NMR Spectrum of **7** in  $\text{D}_2\text{O}$  (400 MHz) at 25  $^\circ\text{C}$

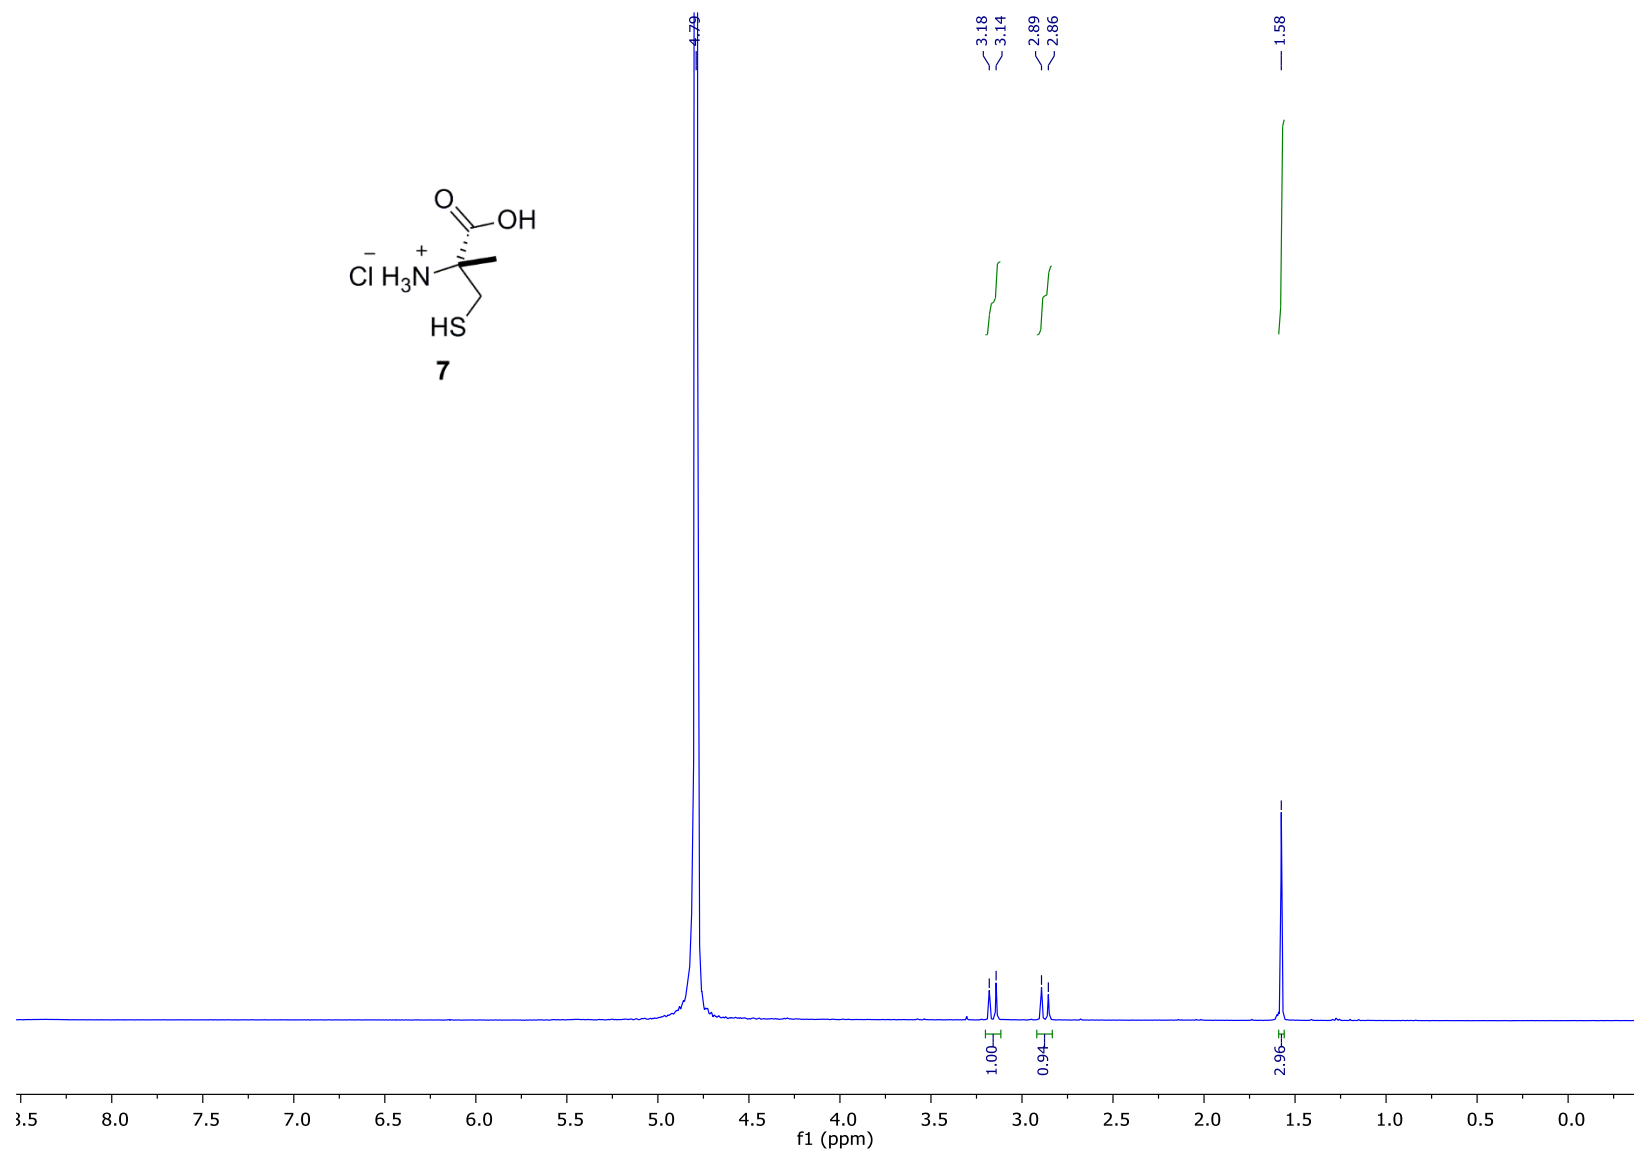

**Figure S15.**  $^{13}\text{C}$  NMR Spectrum of **7** in  $\text{D}_2\text{O}$  (100 MHz) at 25  $^\circ\text{C}$

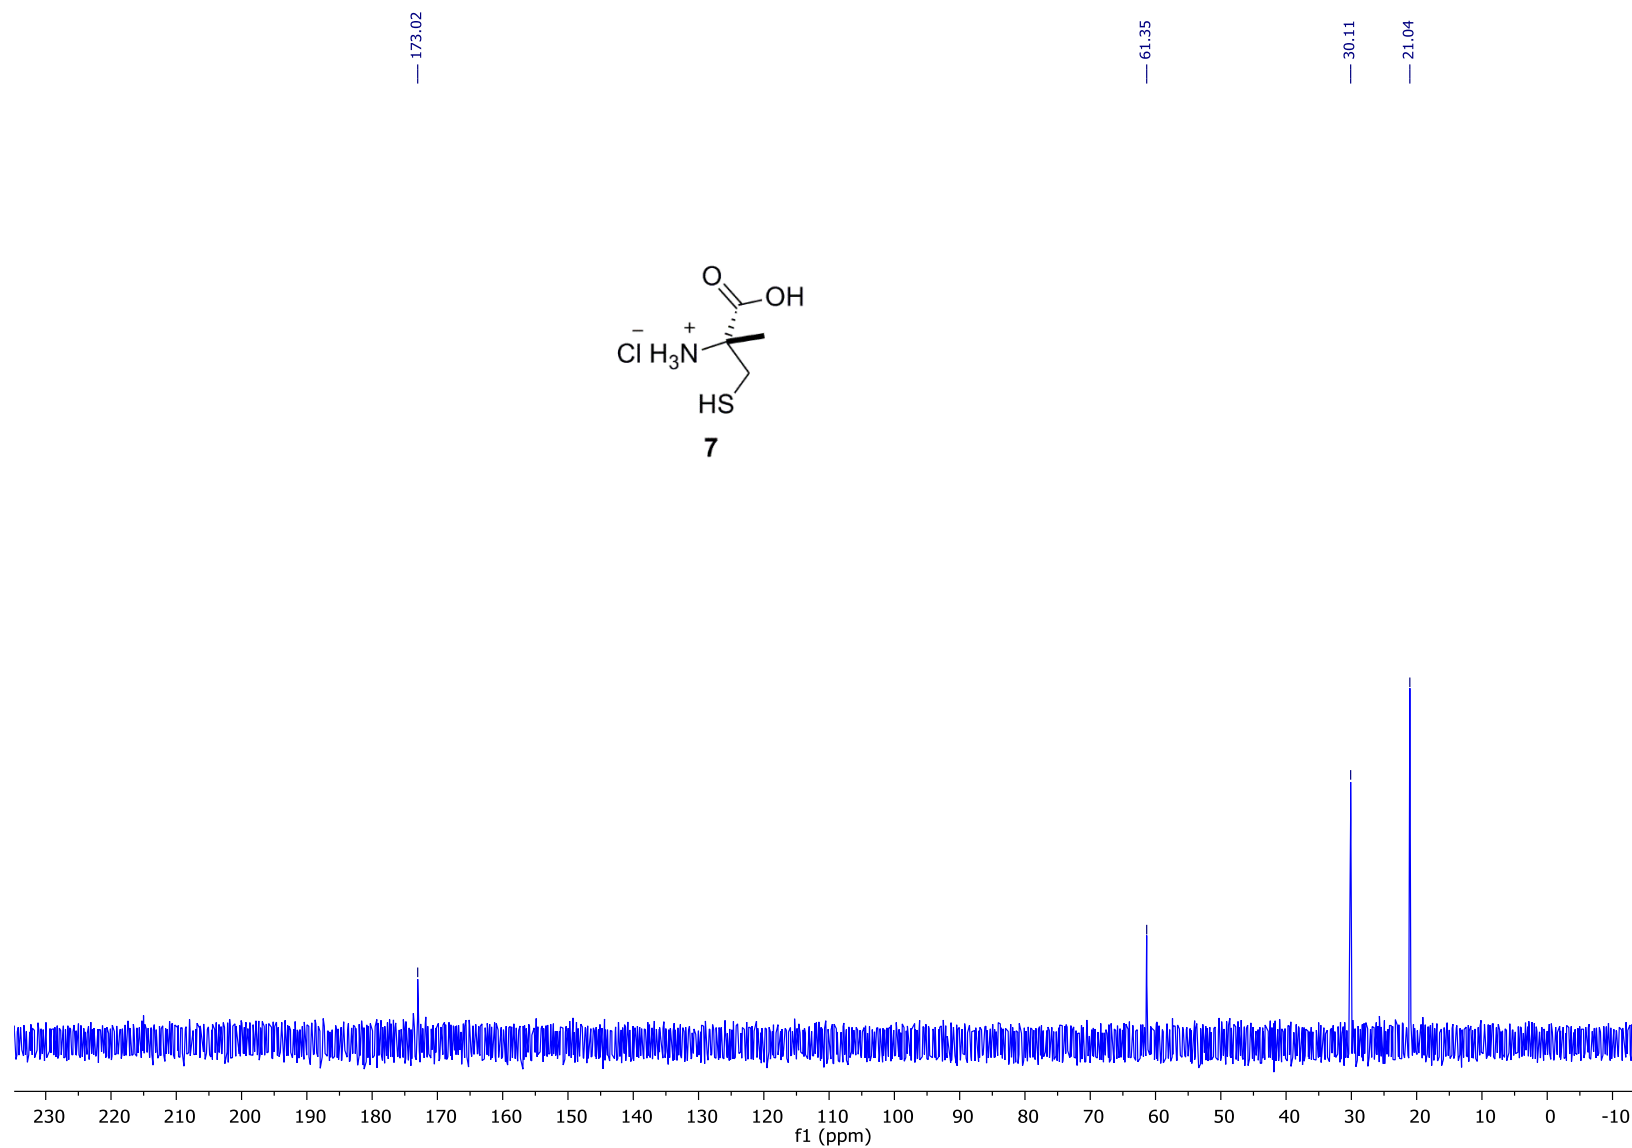



Figure S16.  $^1\text{H}$  NMR Spectrum of **23** in  $\text{CDCl}_3$  (400 MHz) at 25  $^\circ\text{C}$

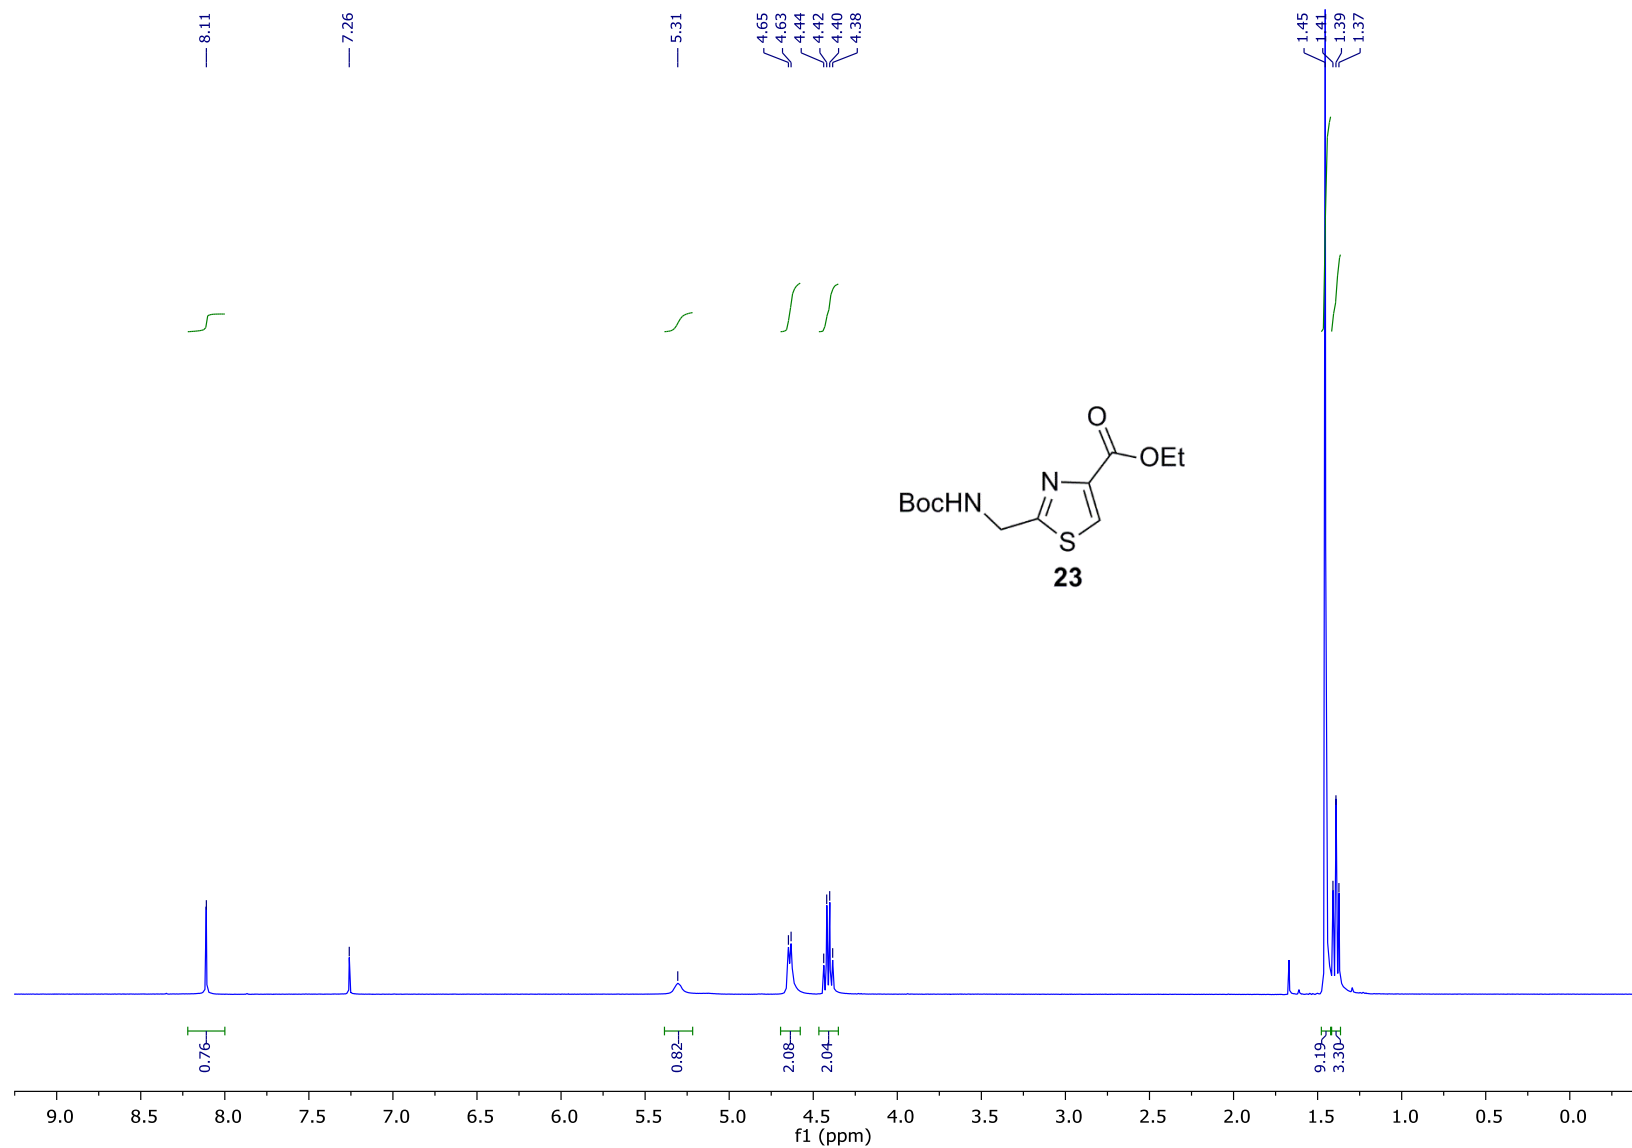

**Figure S17.**  $^{13}\text{C}$  NMR Spectrum of **23** in  $\text{CDCl}_3$  (100 MHz) at 25  $^\circ\text{C}$

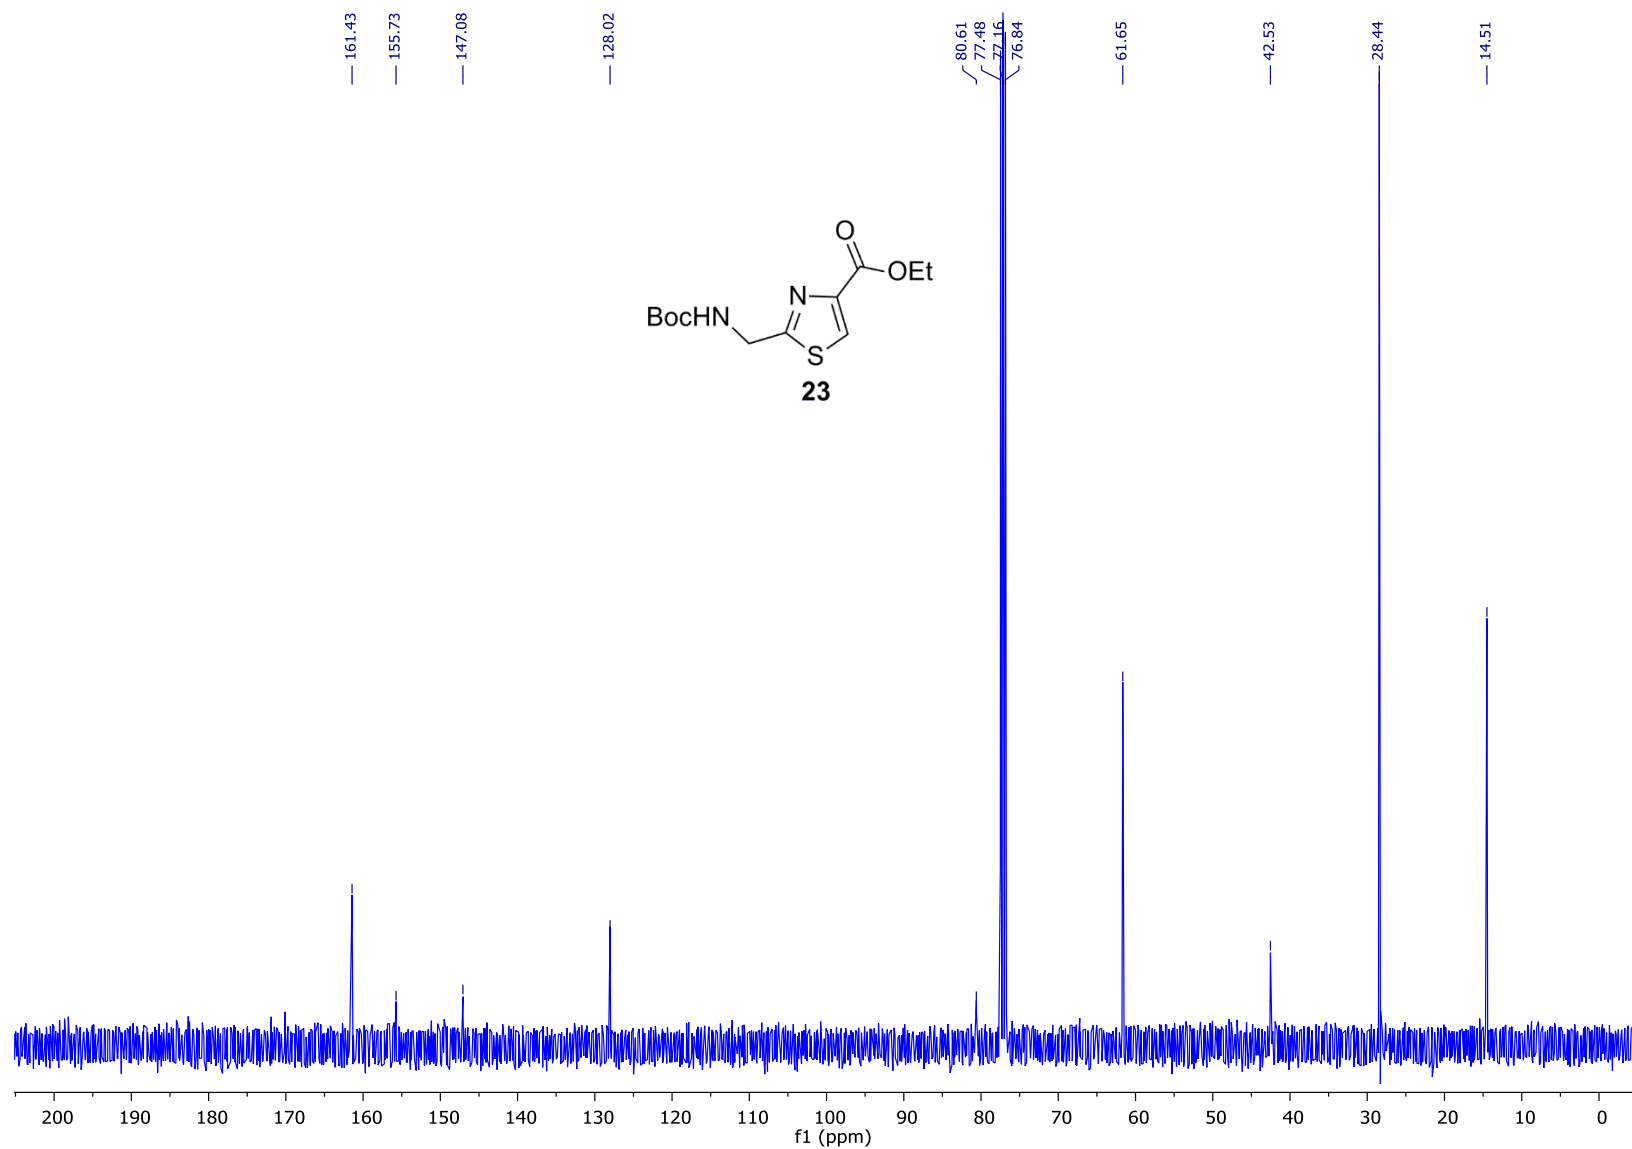

**Figure S18.**  $^1\text{H}$  NMR Spectrum of **24** in  $\text{CDCl}_3$  (500 MHz) at 25  $^\circ\text{C}$

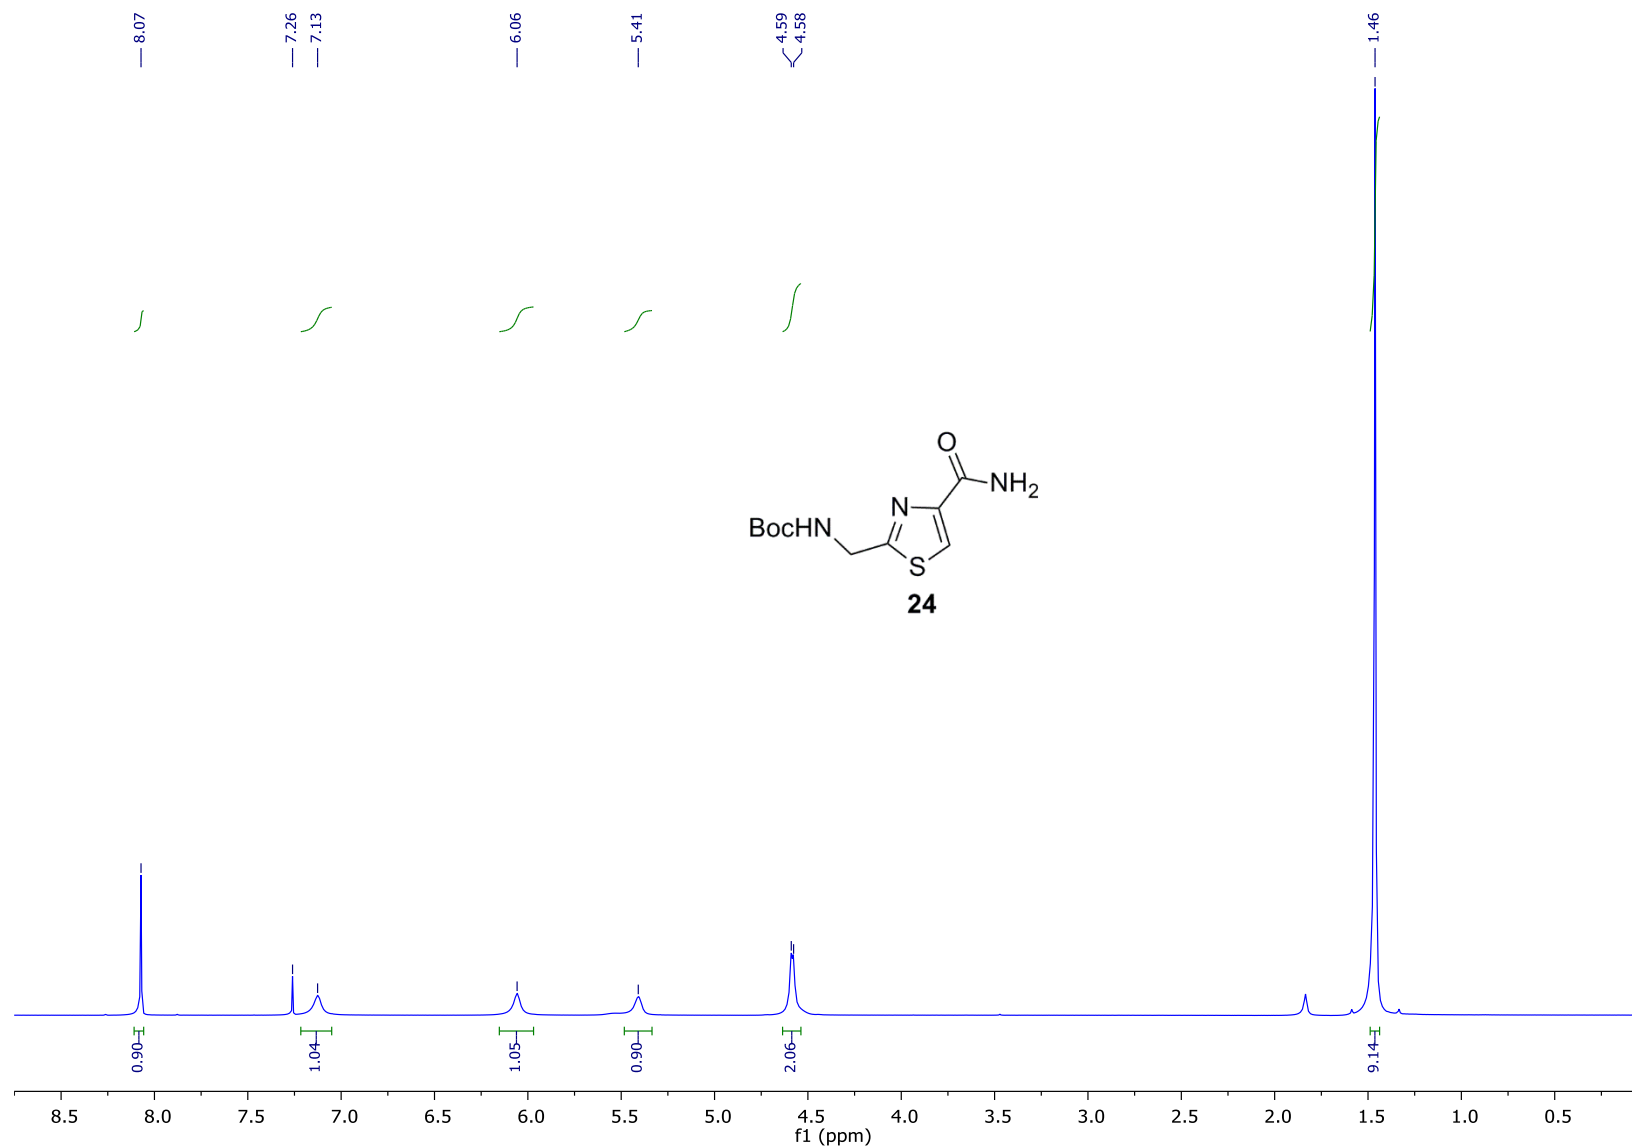

**Figure S19.**  $^{13}\text{C}$  NMR Spectrum of **24** in  $\text{CDCl}_3$  (125 MHz) at 25  $^\circ\text{C}$

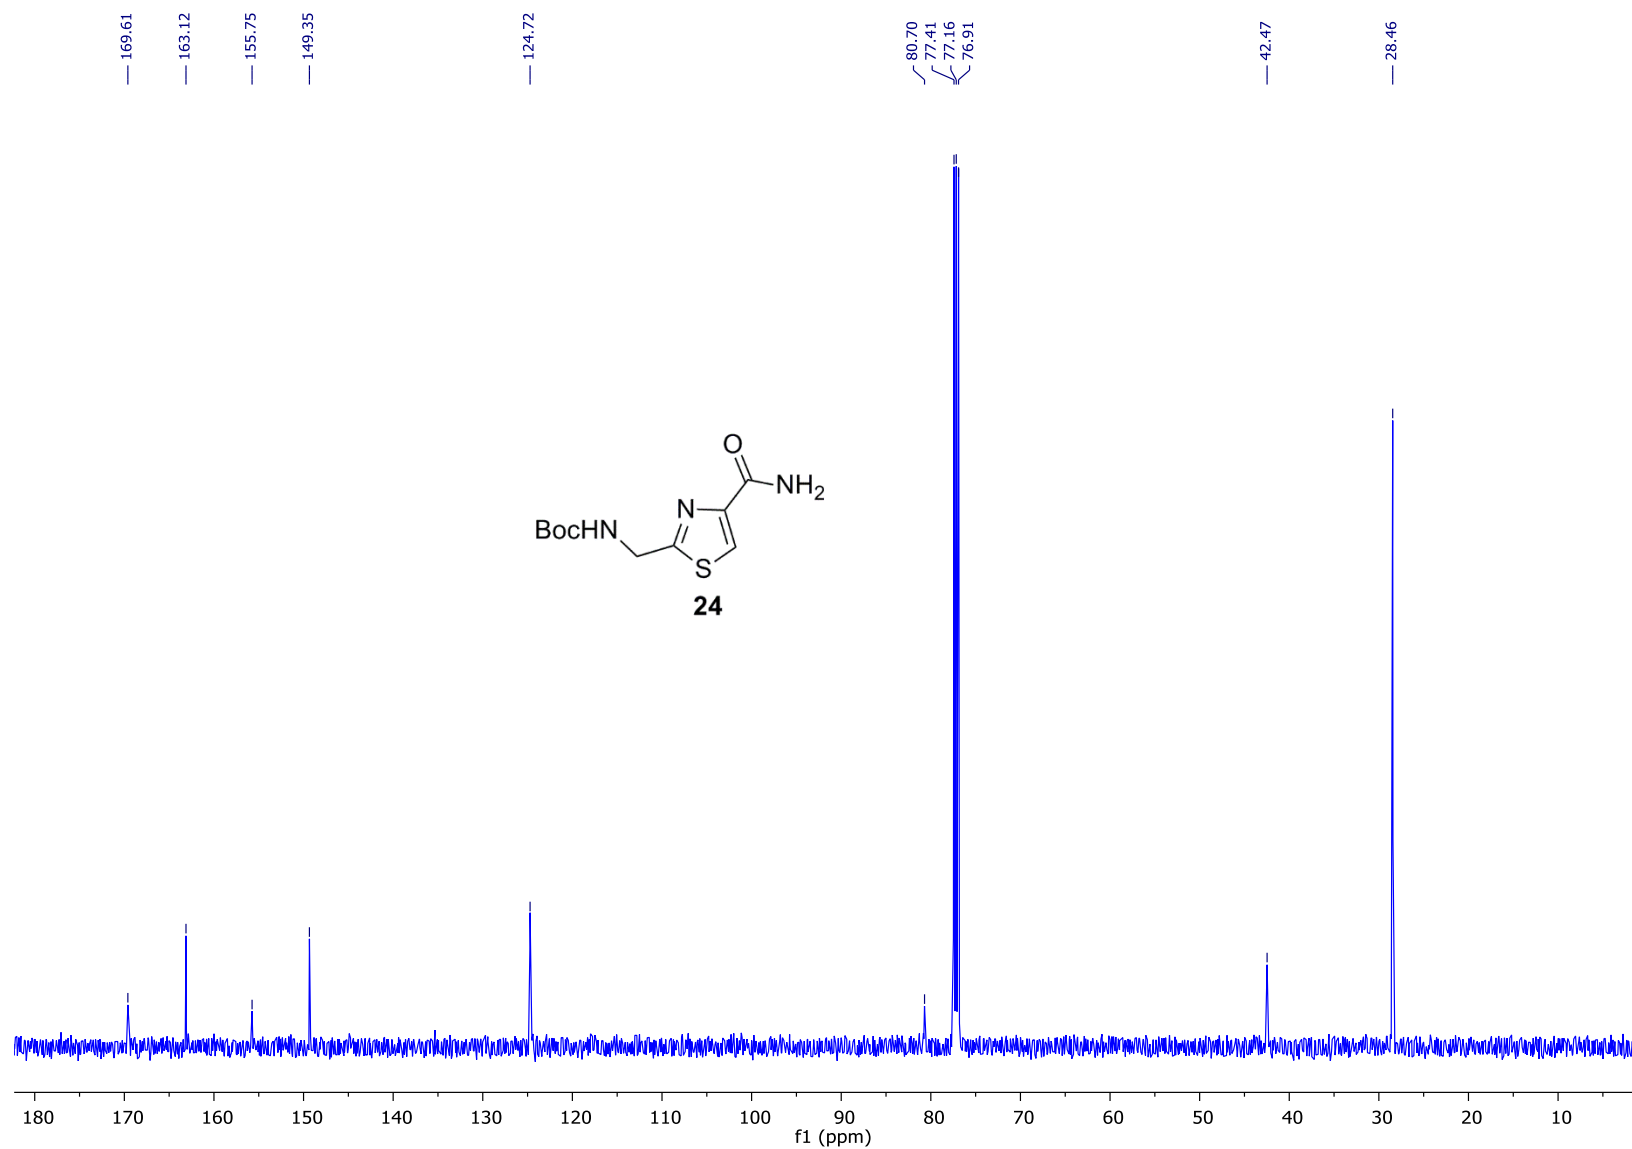

Figure S20.  $^1\text{H}$  NMR Spectrum of **8** in  $\text{CDCl}_3$  (400 MHz) at 25  $^\circ\text{C}$

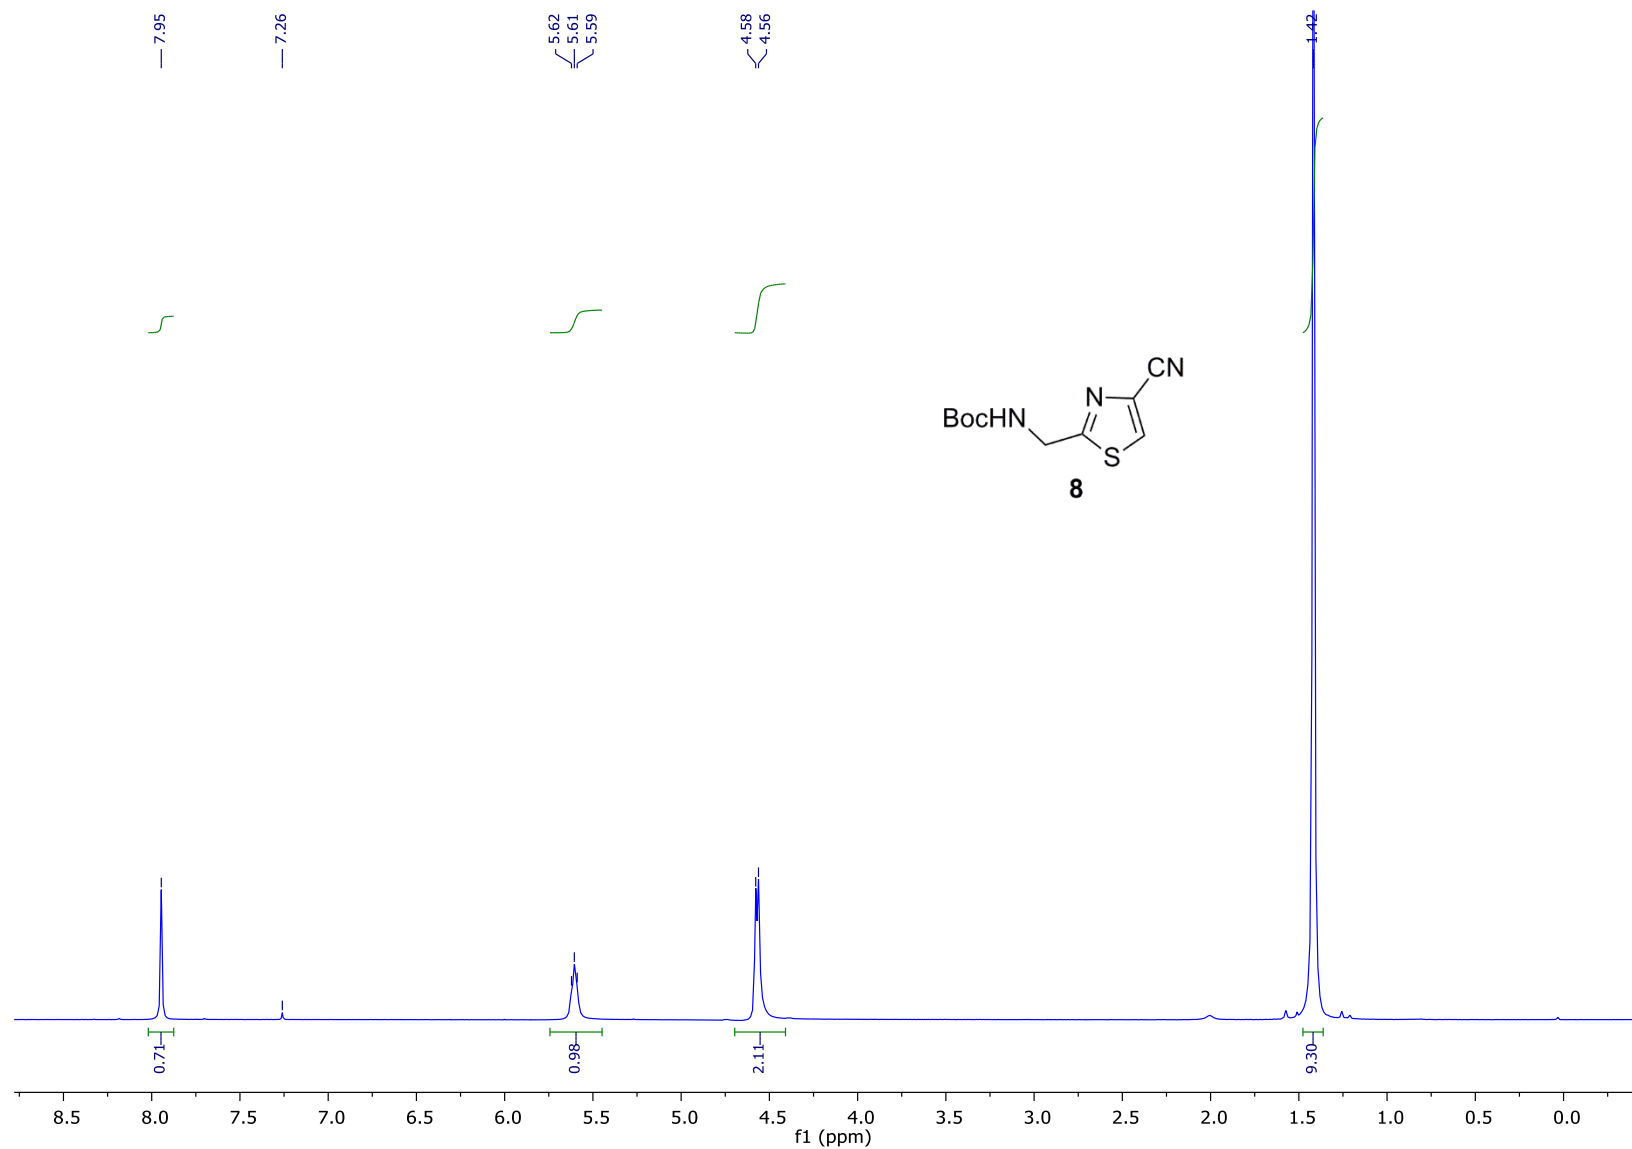

**Figure S21.**  $^{13}\text{C}$  NMR Spectrum of **8** in  $\text{CDCl}_3$  (100 MHz) at 25  $^\circ\text{C}$

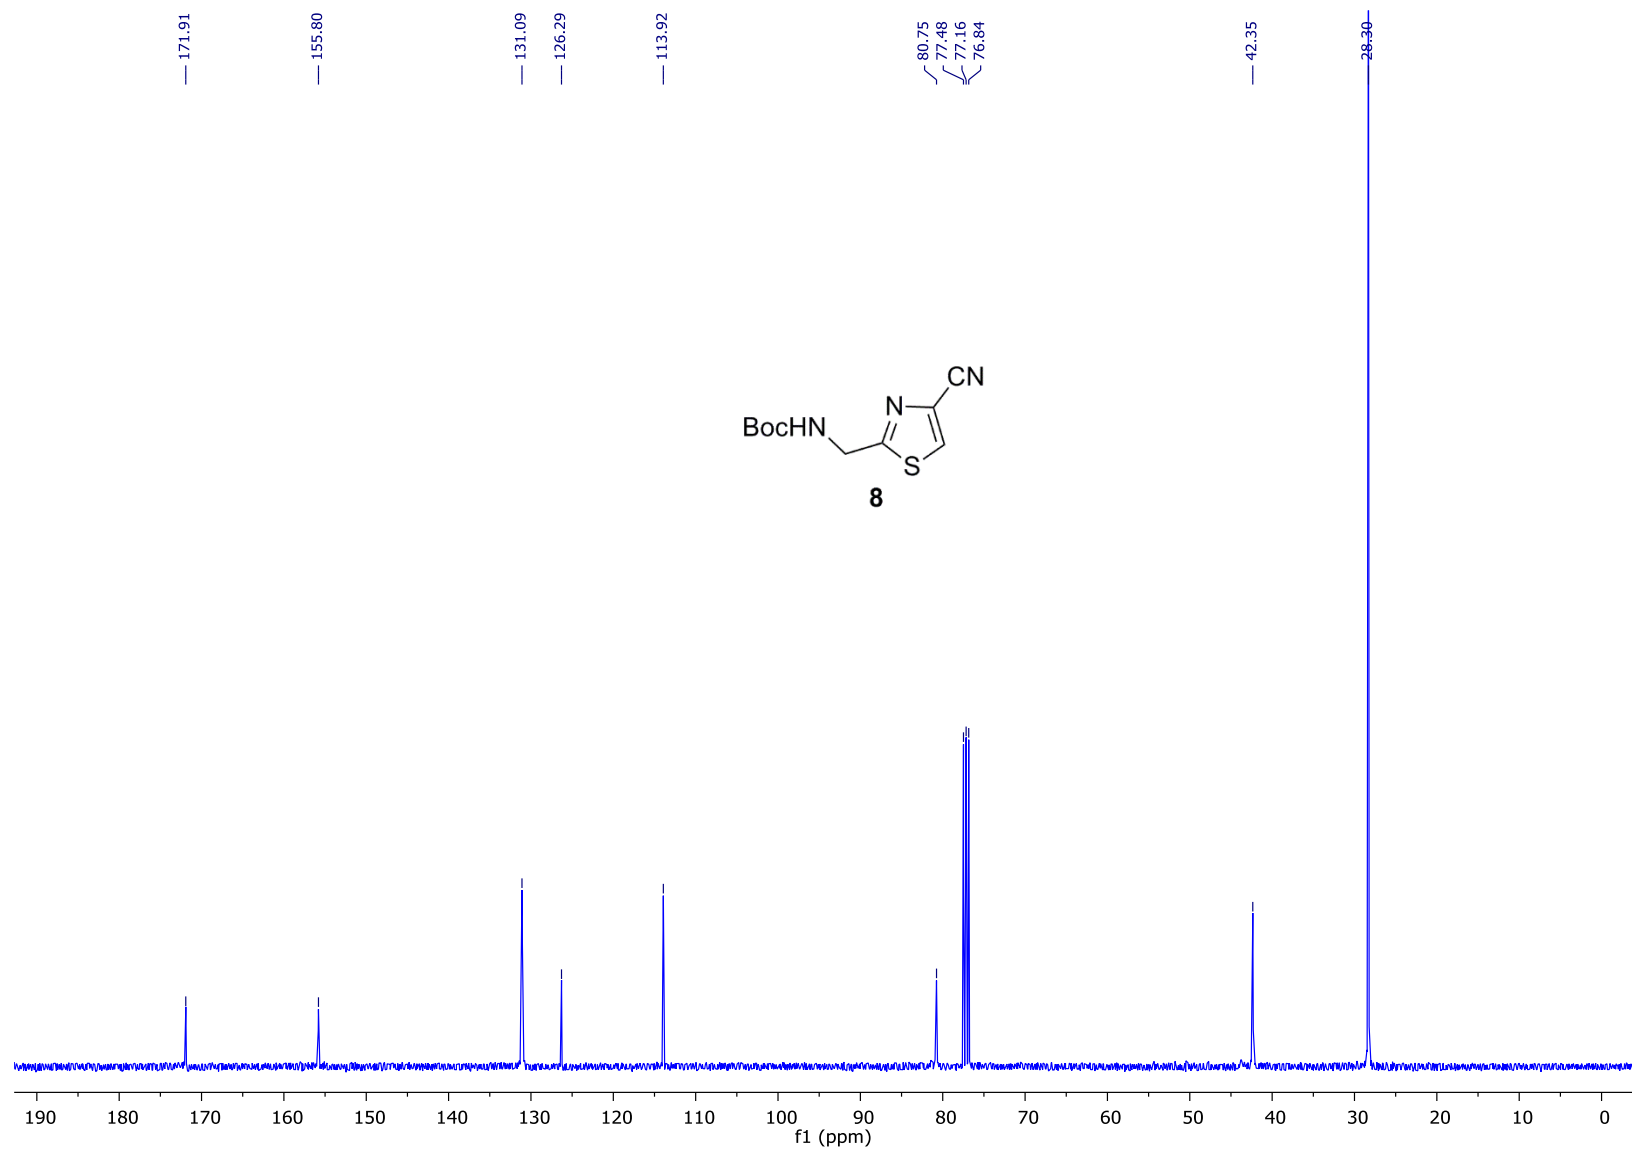

Figure S22. <sup>1</sup>H NMR Spectrum of **5** in CDCl<sub>3</sub> (400 MHz) at 25 °C

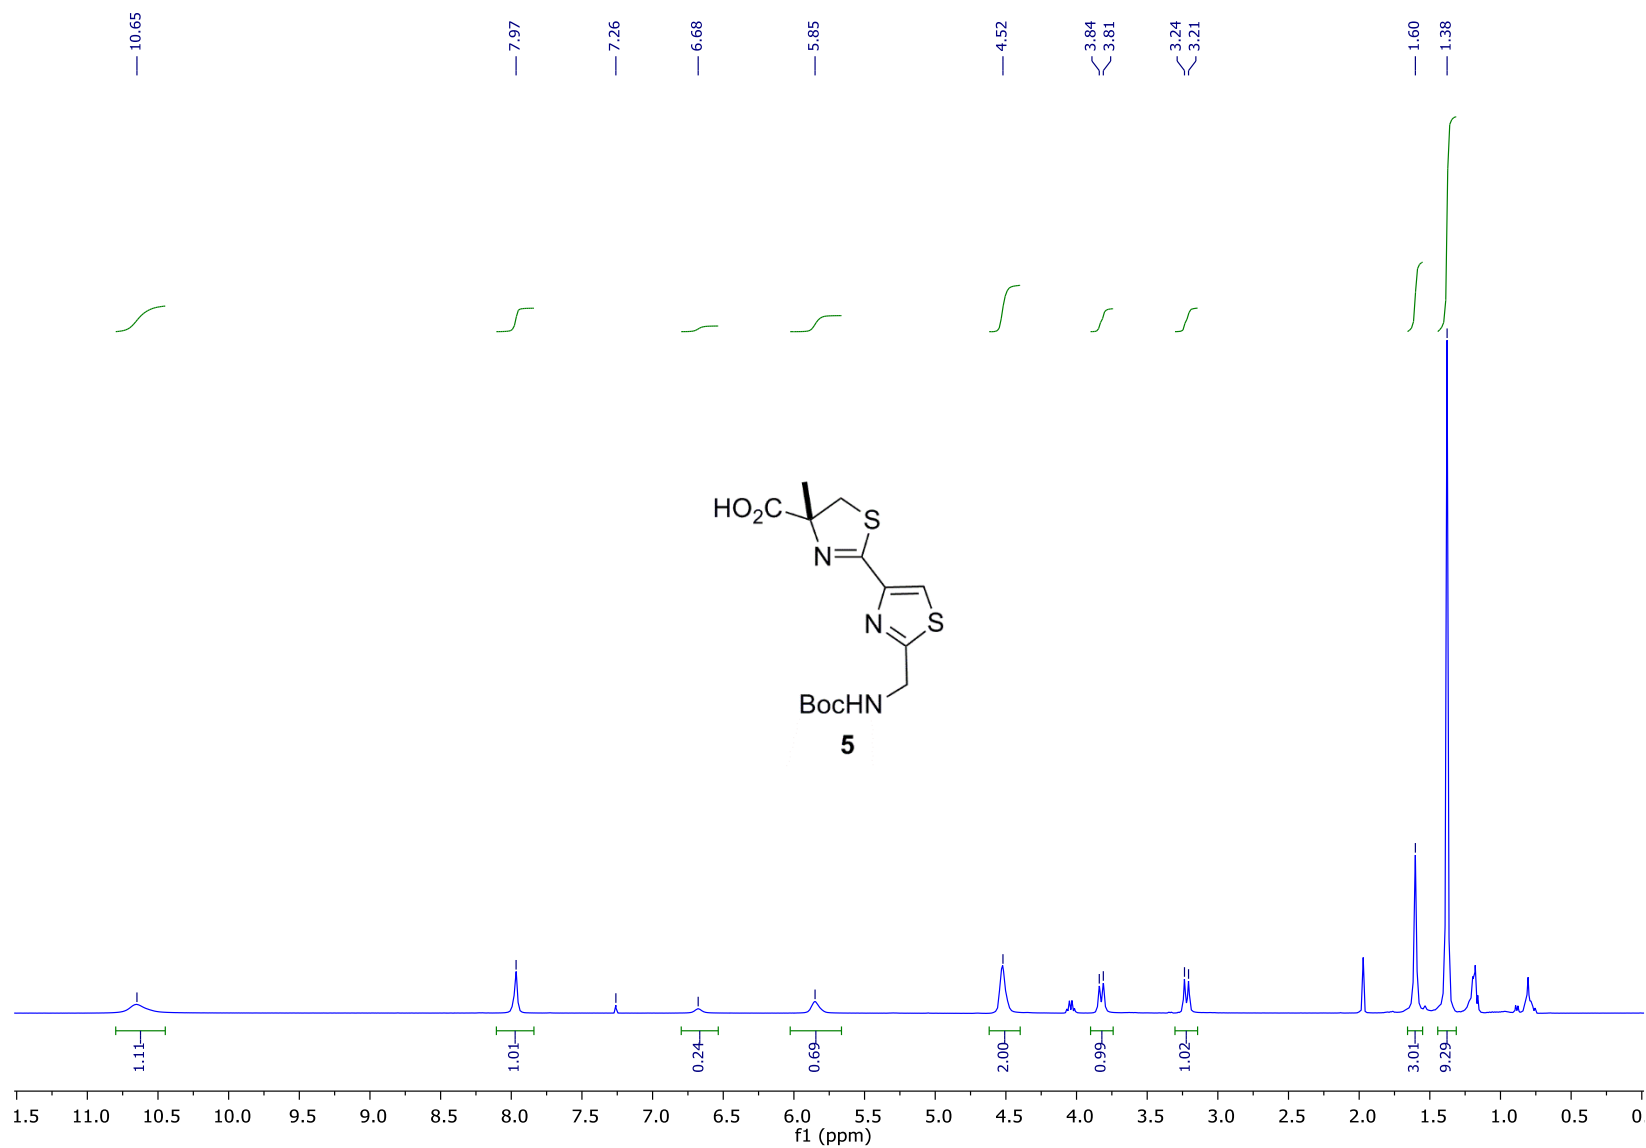

**Figure S23.**  $^{13}\text{C}$  NMR Spectrum of **5** in  $\text{CDCl}_3$  (100 MHz) at 25  $^\circ\text{C}$

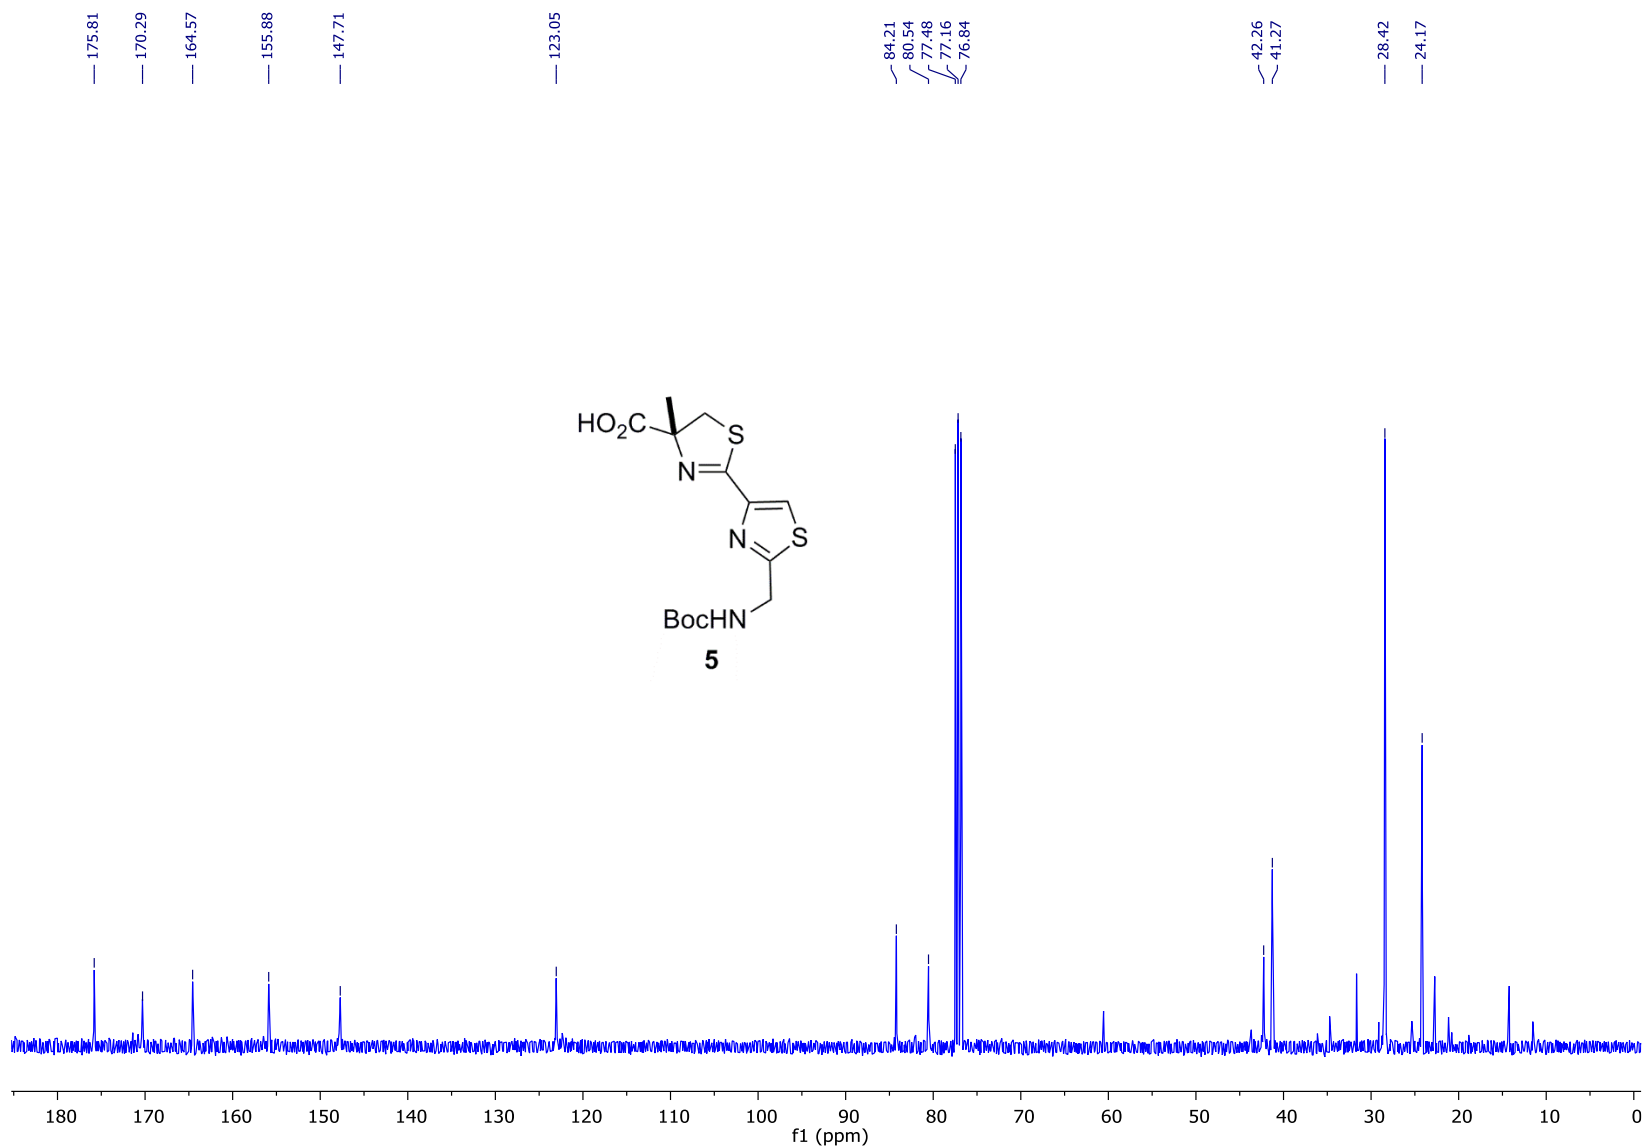



Figure S24.  $^1\text{H}$  NMR Spectrum of (*RS*)-**9** in  $\text{CDCl}_3$  (400 MHz) at 25  $^\circ\text{C}$

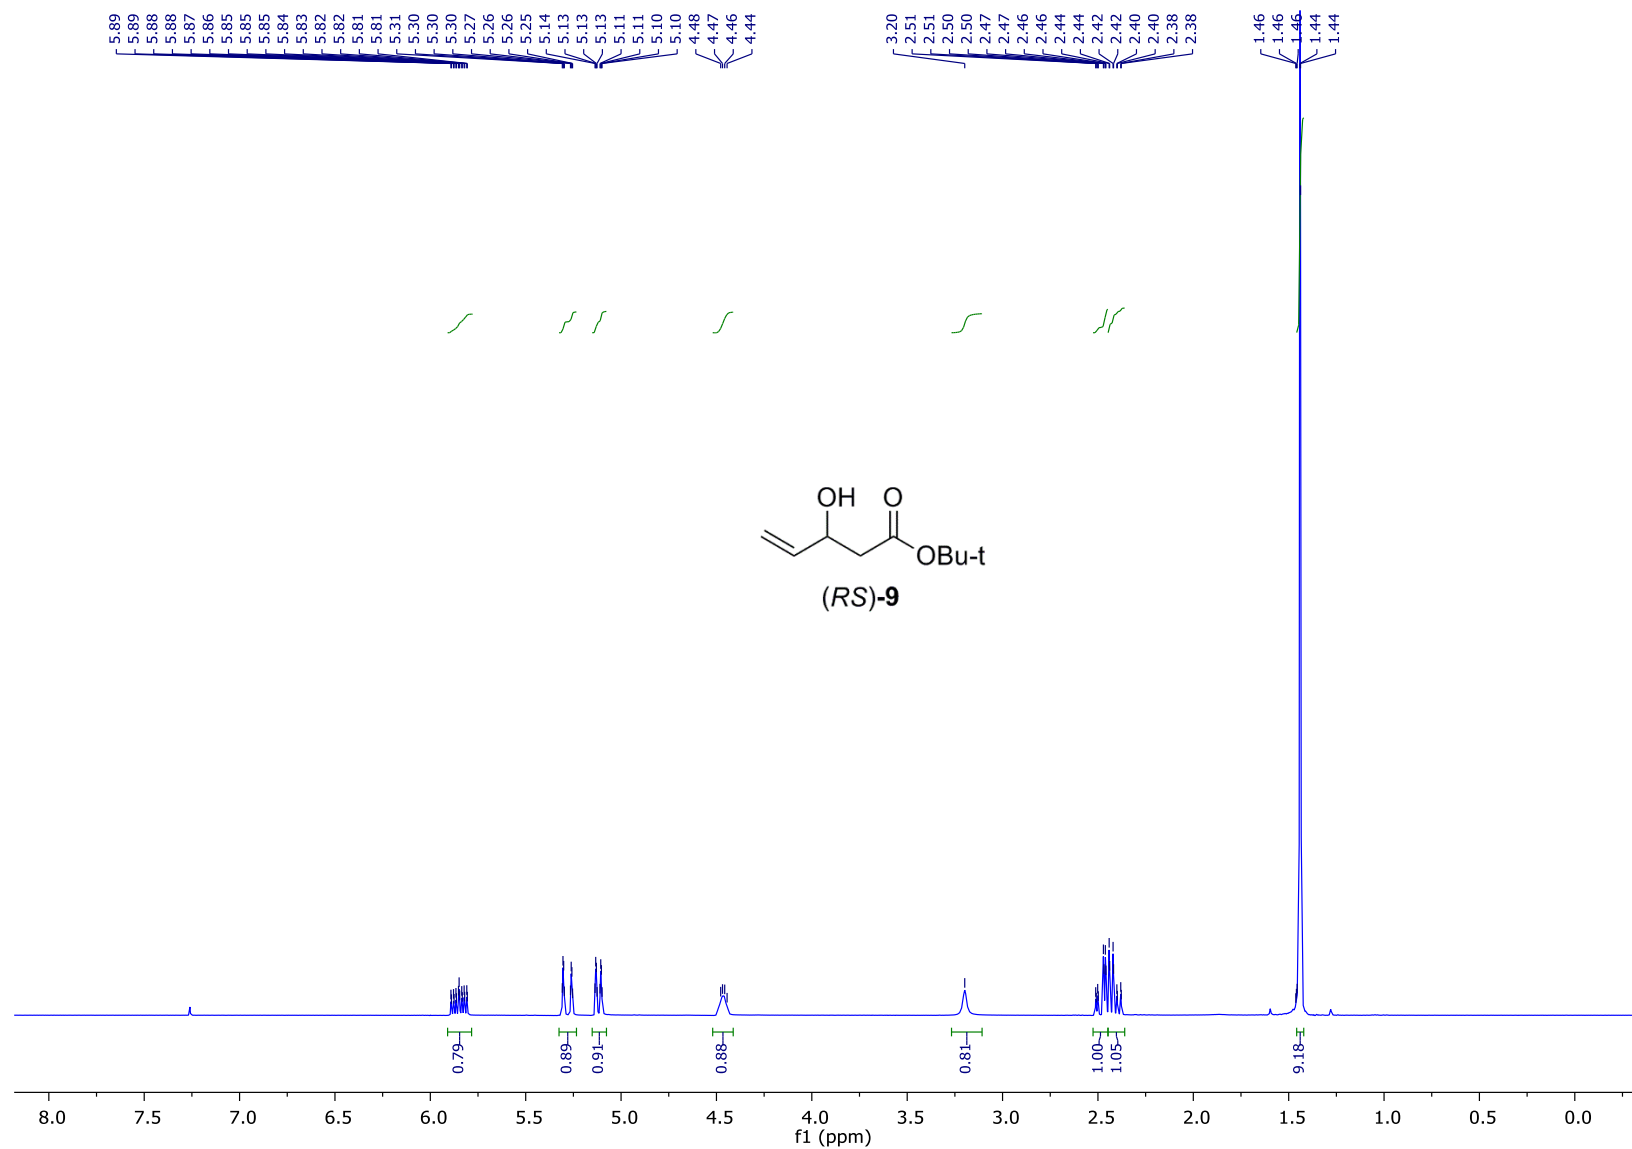

**Figure S25.**  $^{13}\text{C}$  NMR Spectrum of (*RS*)-**9** in  $\text{CDCl}_3$  (100 MHz) at 25  $^\circ\text{C}$

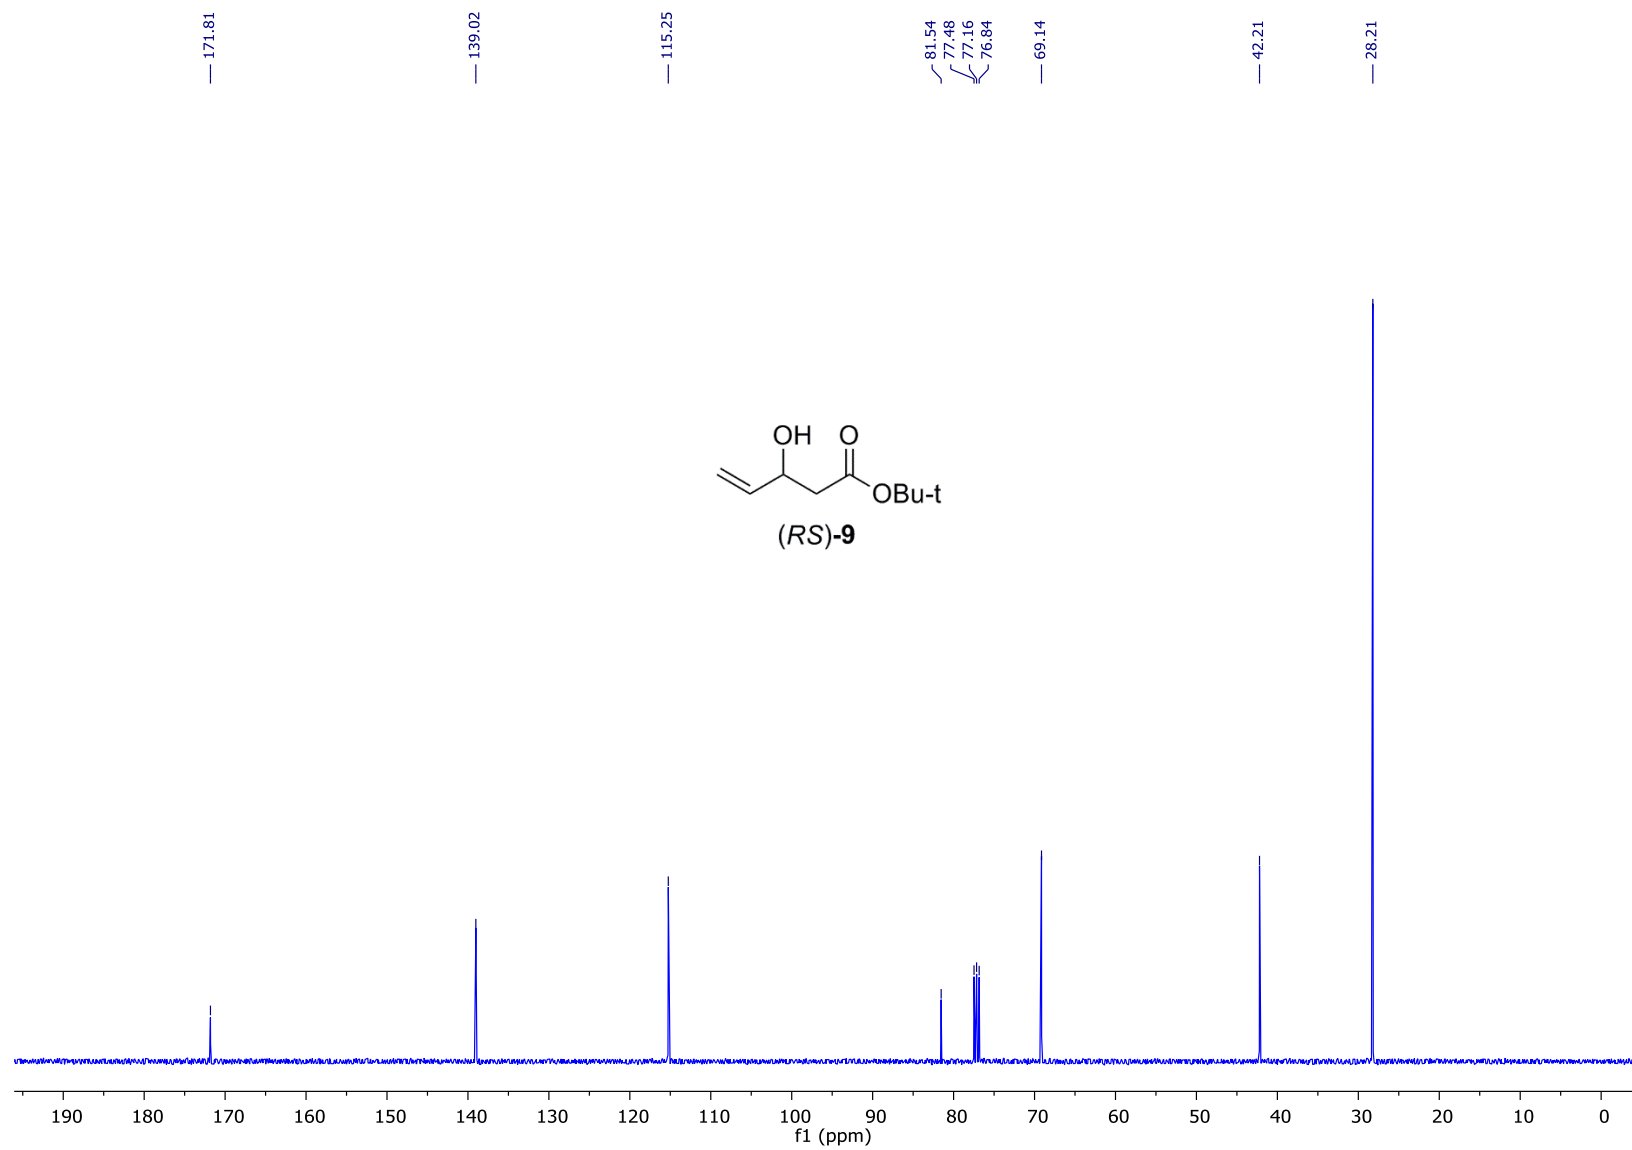

Figure S26.  $^1\text{H}$  NMR Spectrum of (*R*)-**9** in  $\text{CDCl}_3$  (400 MHz) at 25  $^\circ\text{C}$

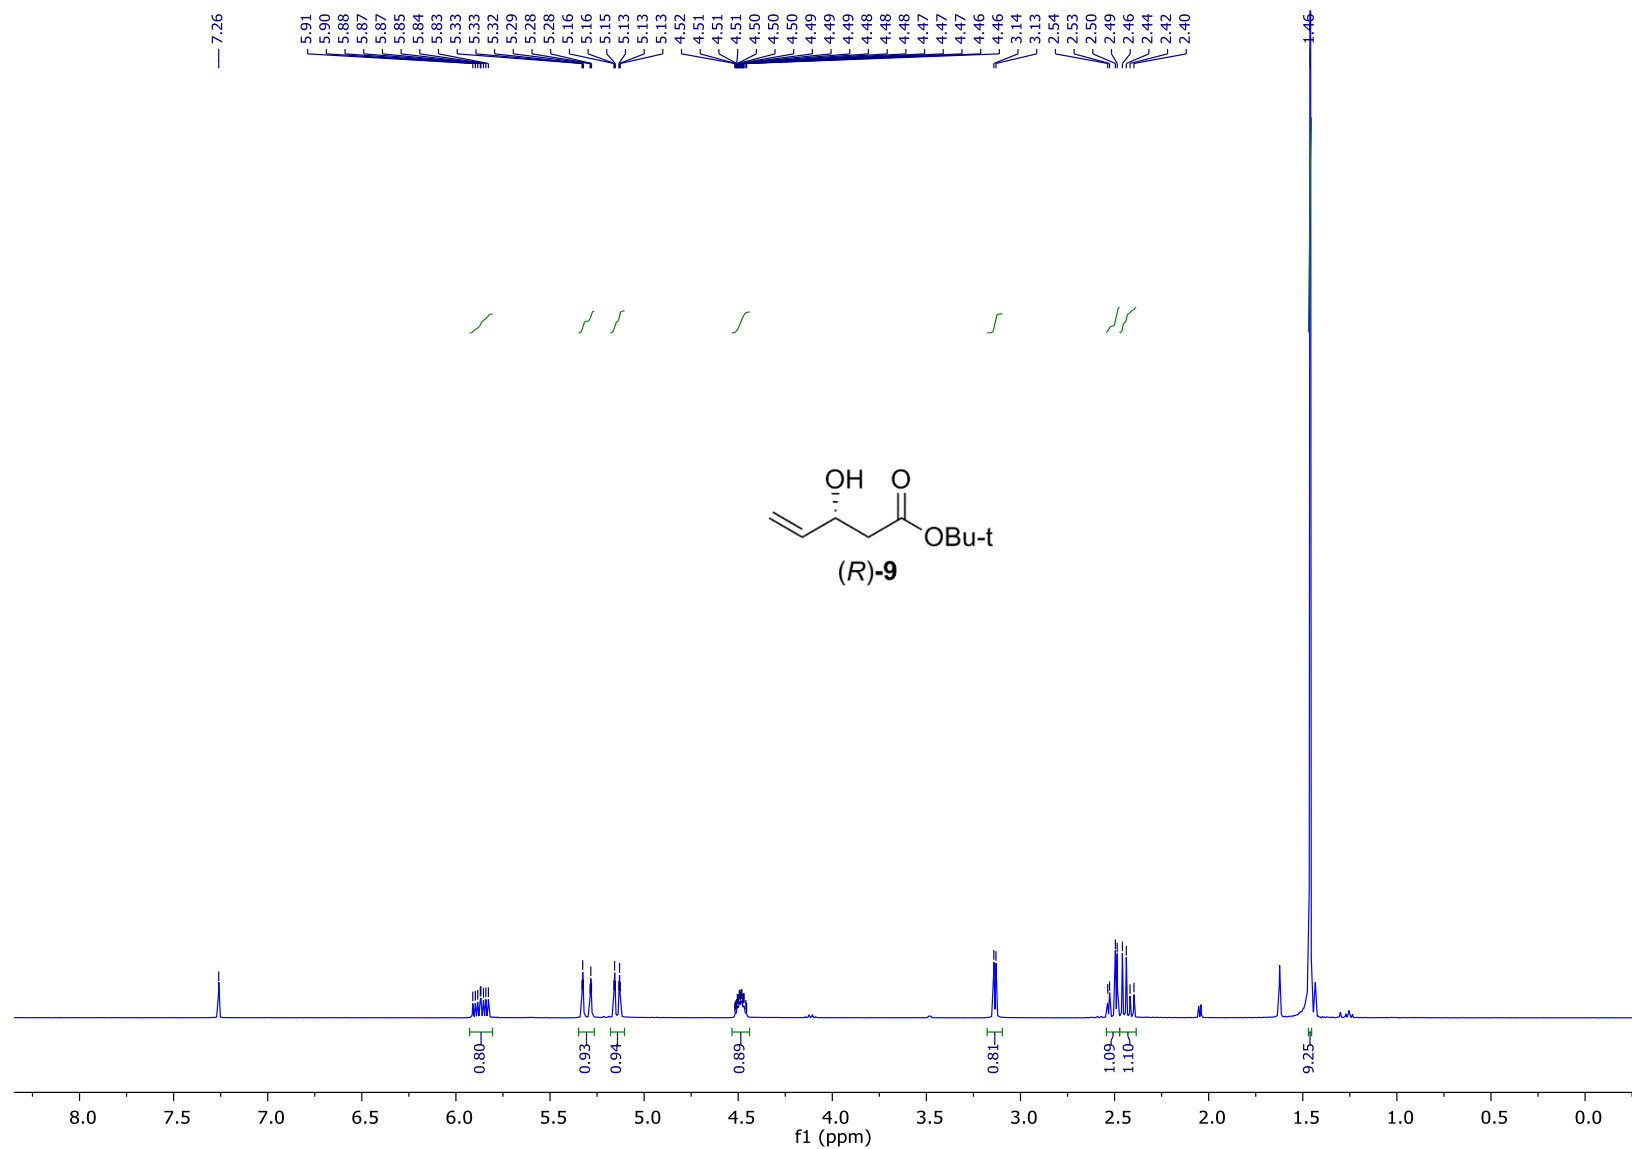

**Figure S27.**  $^{13}\text{C}$  NMR Spectrum of (*R*)-**9** in  $\text{CDCl}_3$  (100 MHz) at 25  $^\circ\text{C}$

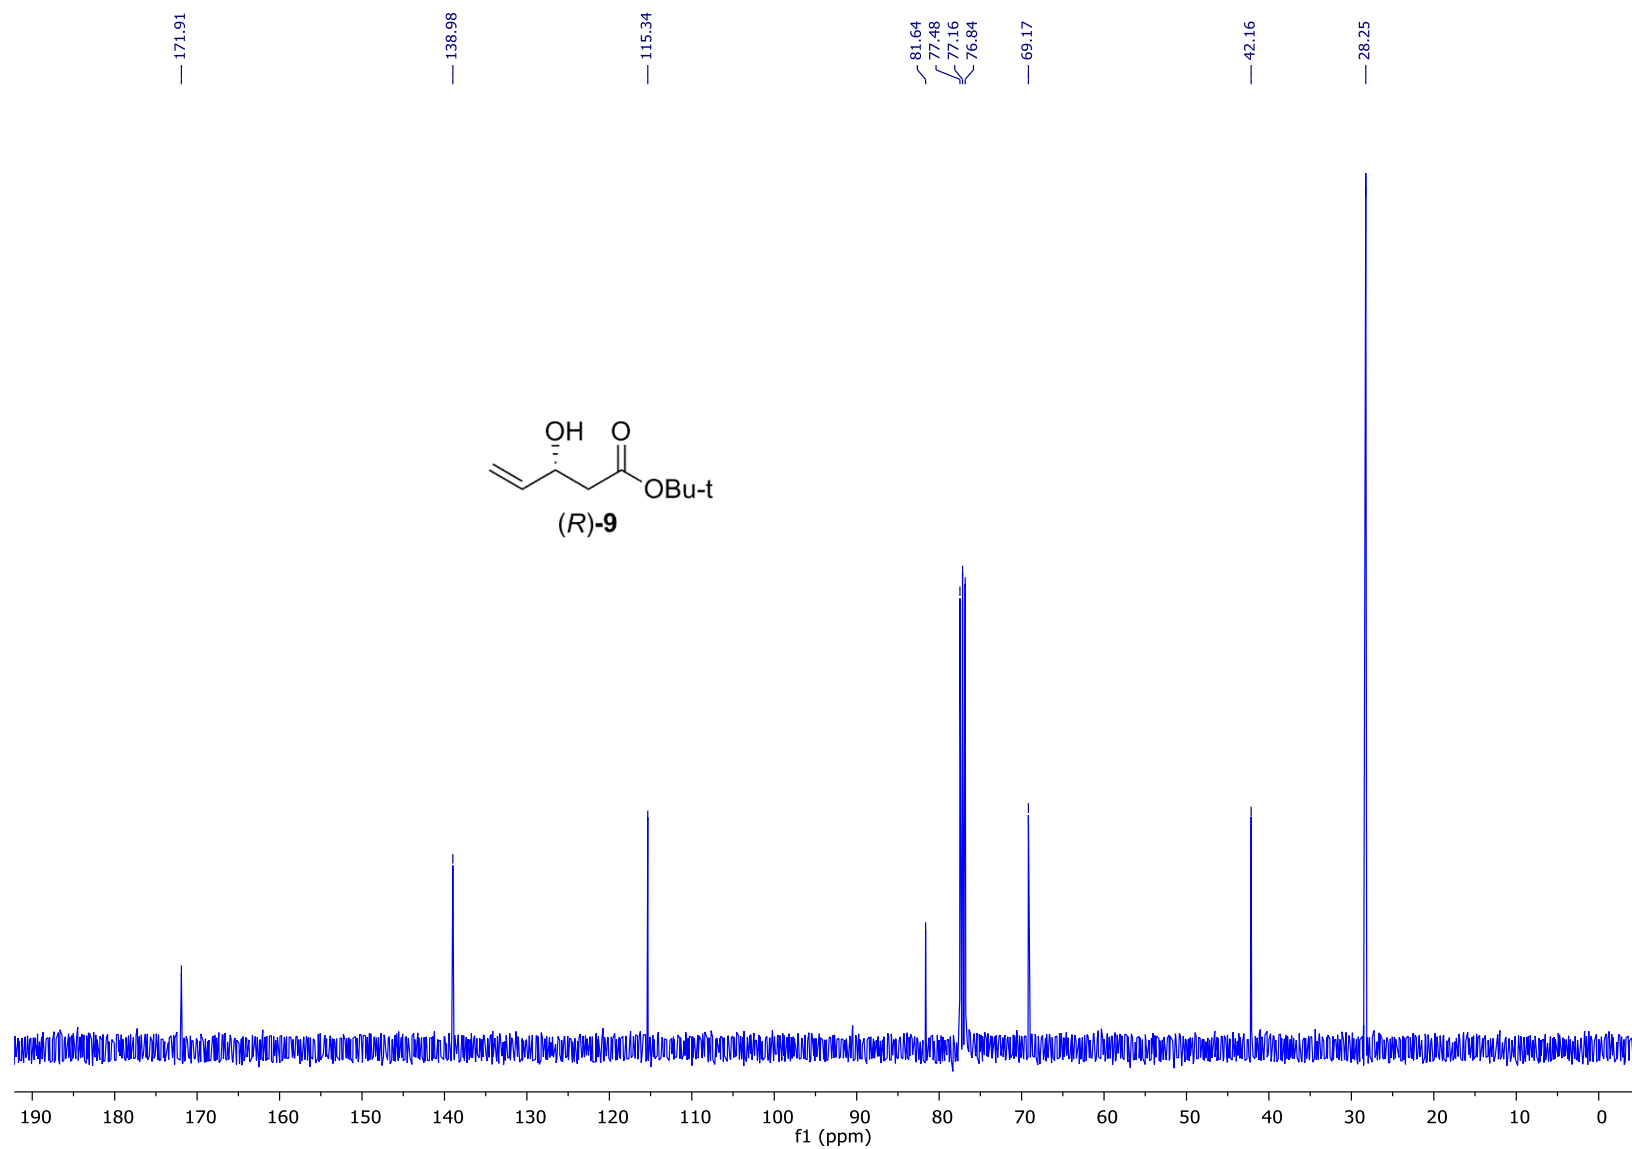

Figure S28.  $^1\text{H}$  NMR Spectrum of (*S*)-**31** in  $\text{CDCl}_3$  (400 MHz) at 25  $^\circ\text{C}$

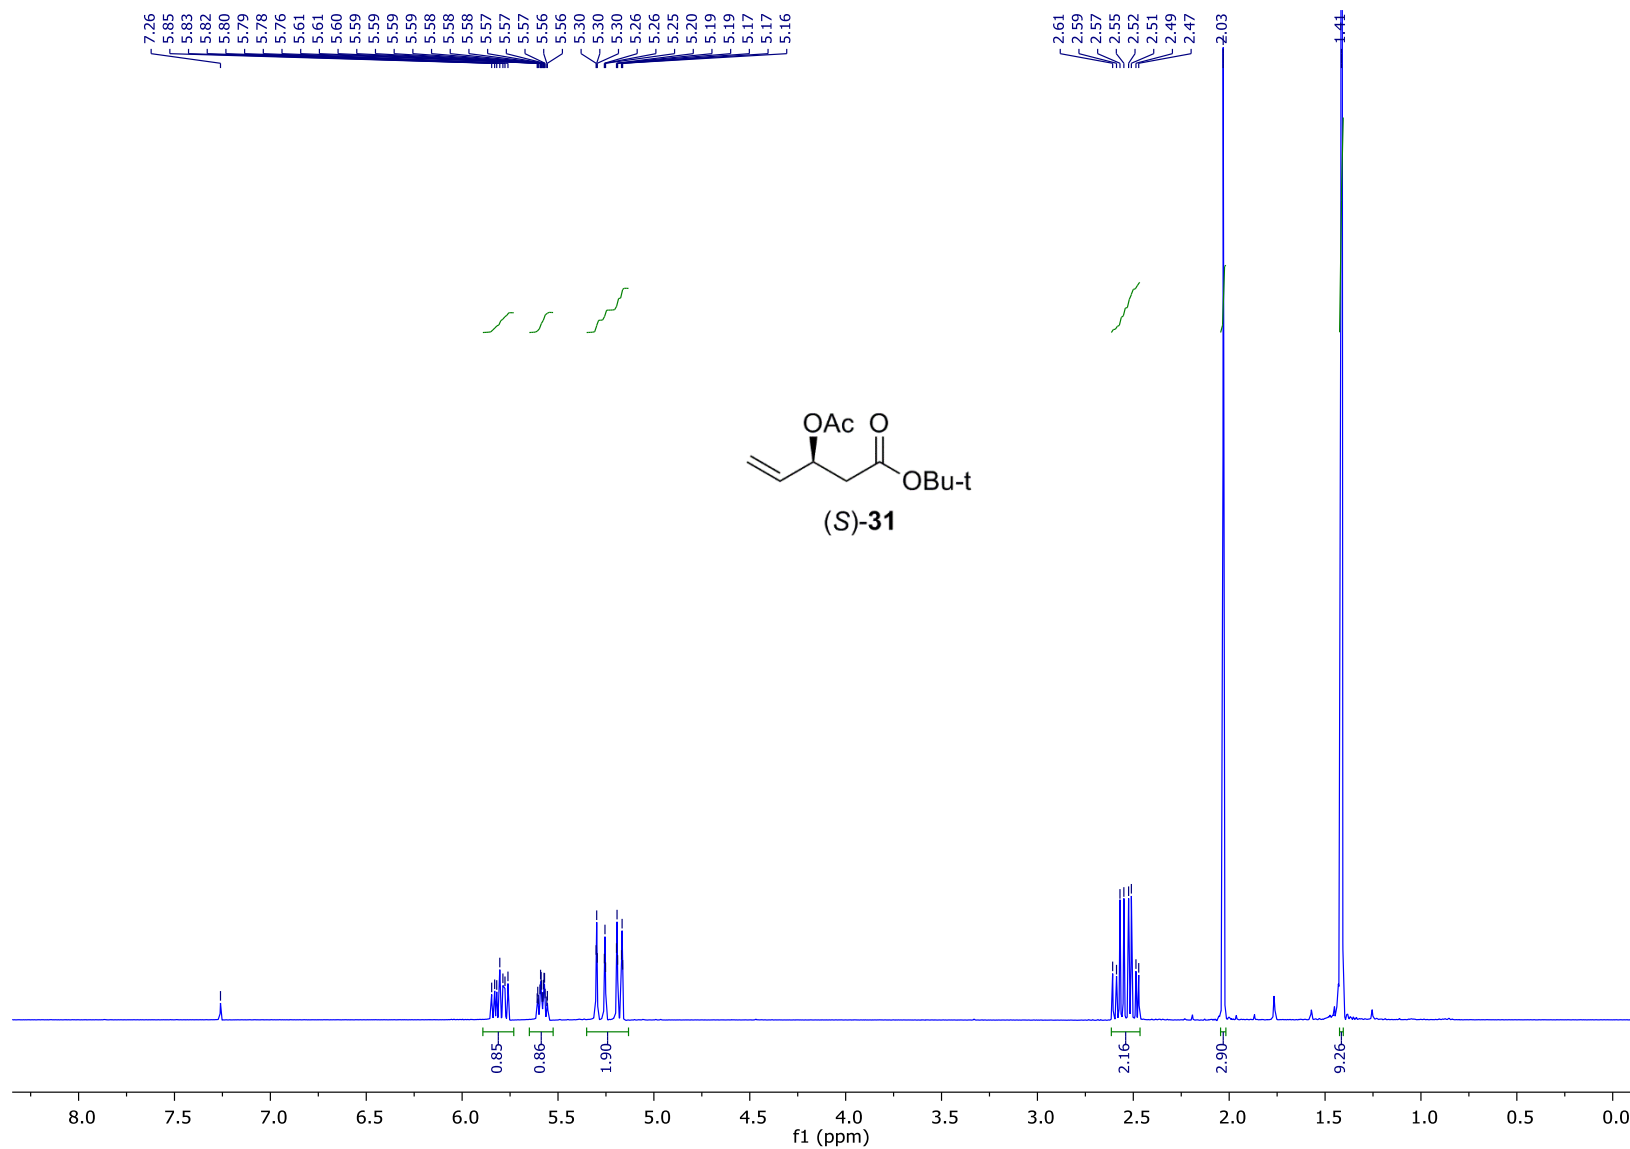

**Figure S29.**  $^{13}\text{C}$  NMR Spectrum of (*S*)-**31** in  $\text{CDCl}_3$  (100 MHz) at 25  $^\circ\text{C}$

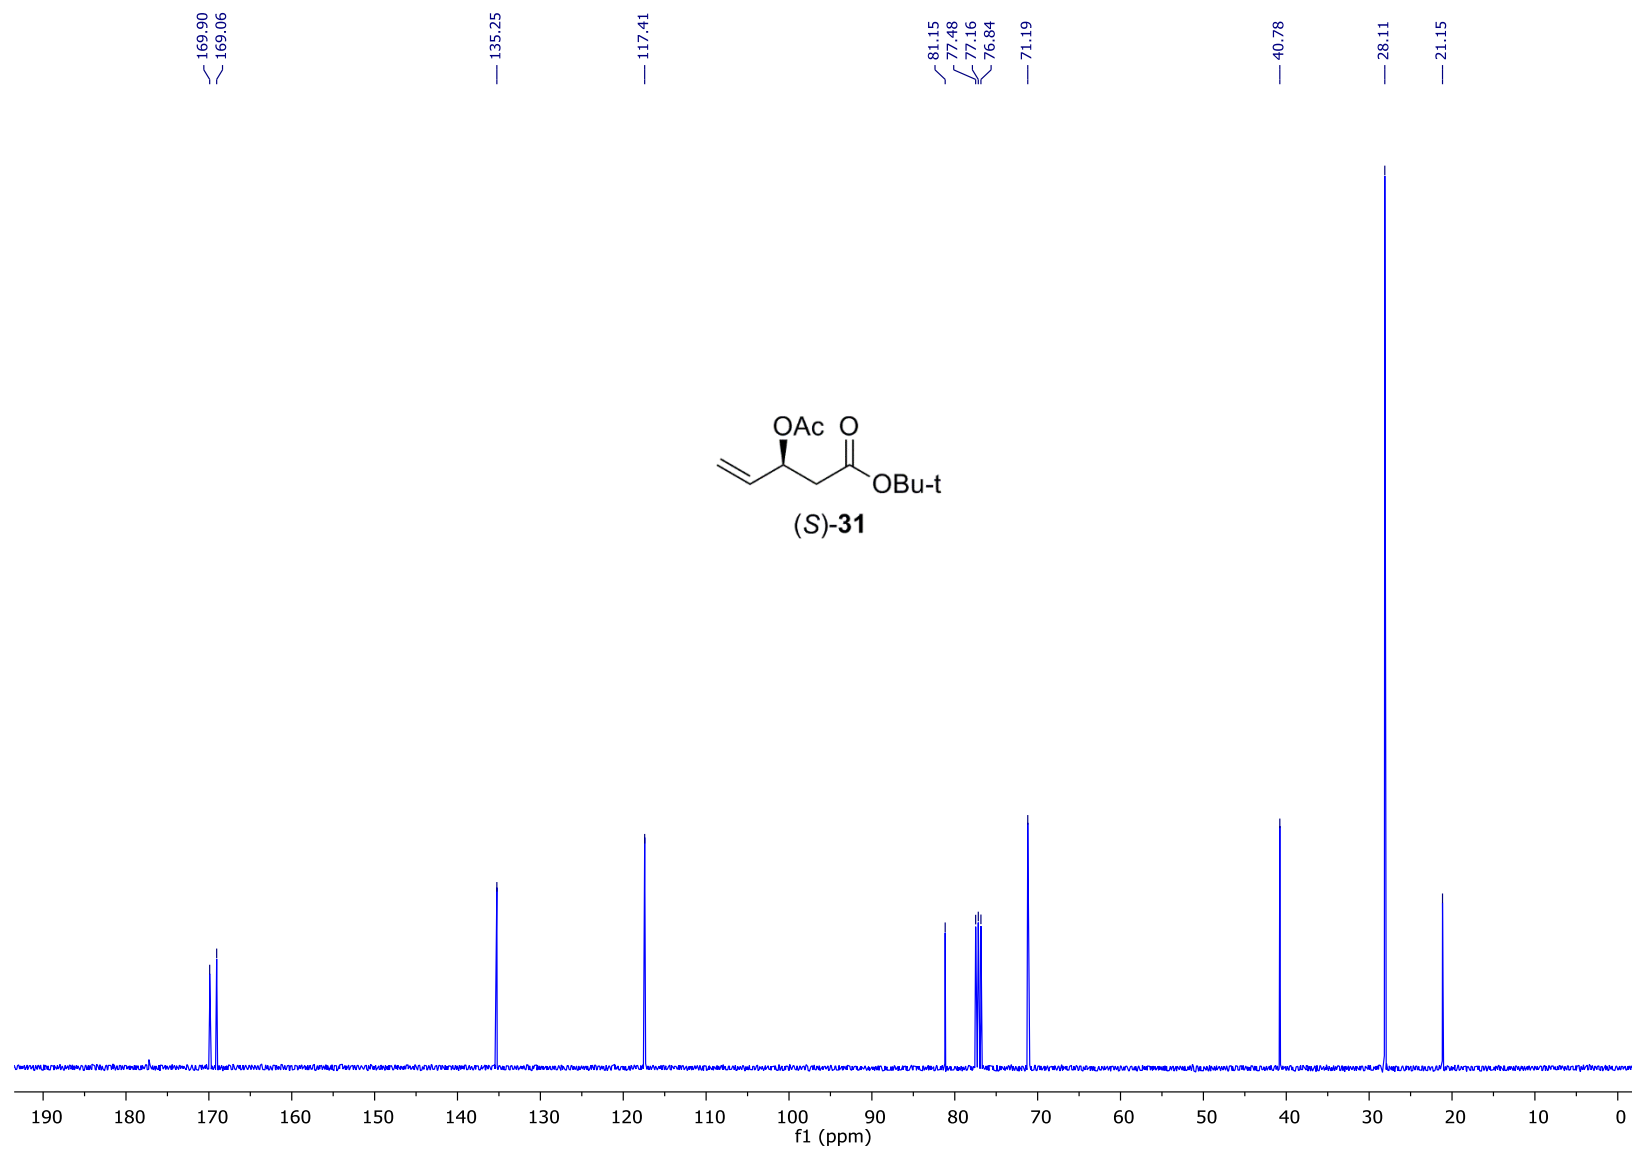

Figure S30.  $^1\text{H}$  NMR Spectrum of (*S*)-**9** in  $\text{CDCl}_3$  (400 MHz) at 25  $^\circ\text{C}$

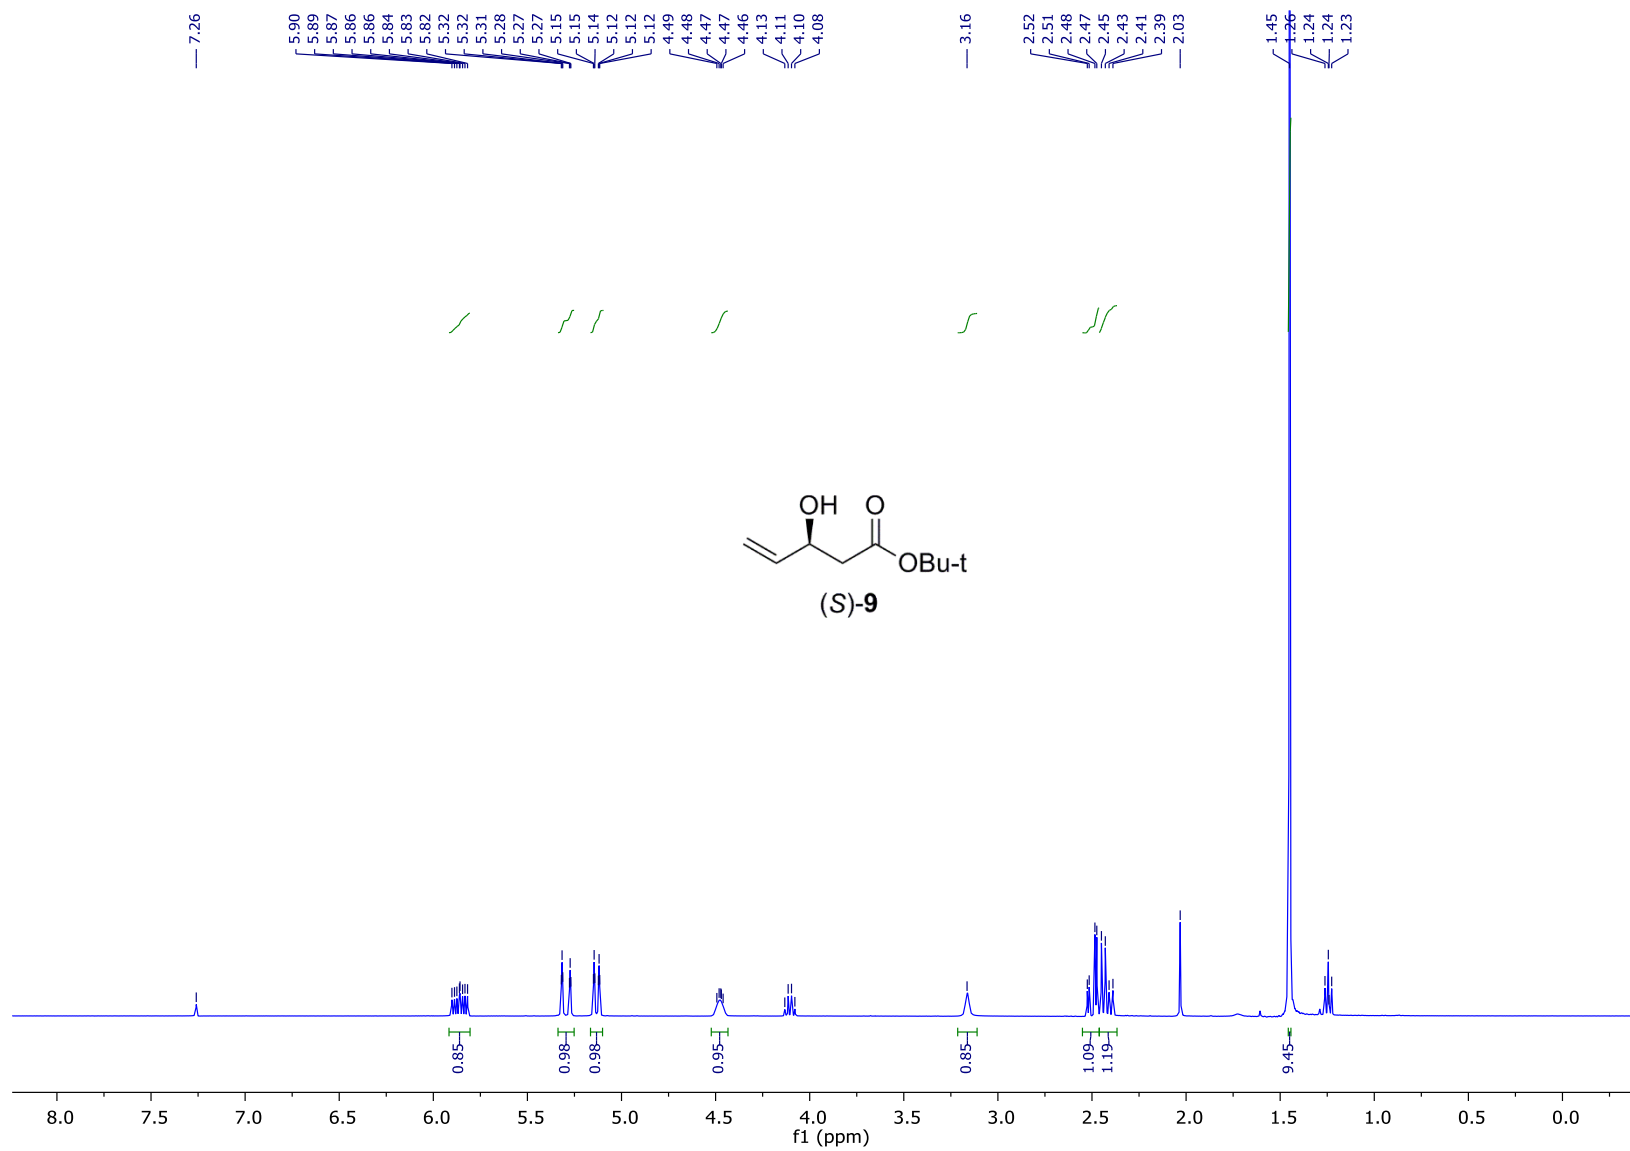

**Figure S31.**  $^{13}\text{C}$  NMR Spectrum of (*S*)-**9** in  $\text{CDCl}_3$  (100 MHz) at 25  $^\circ\text{C}$

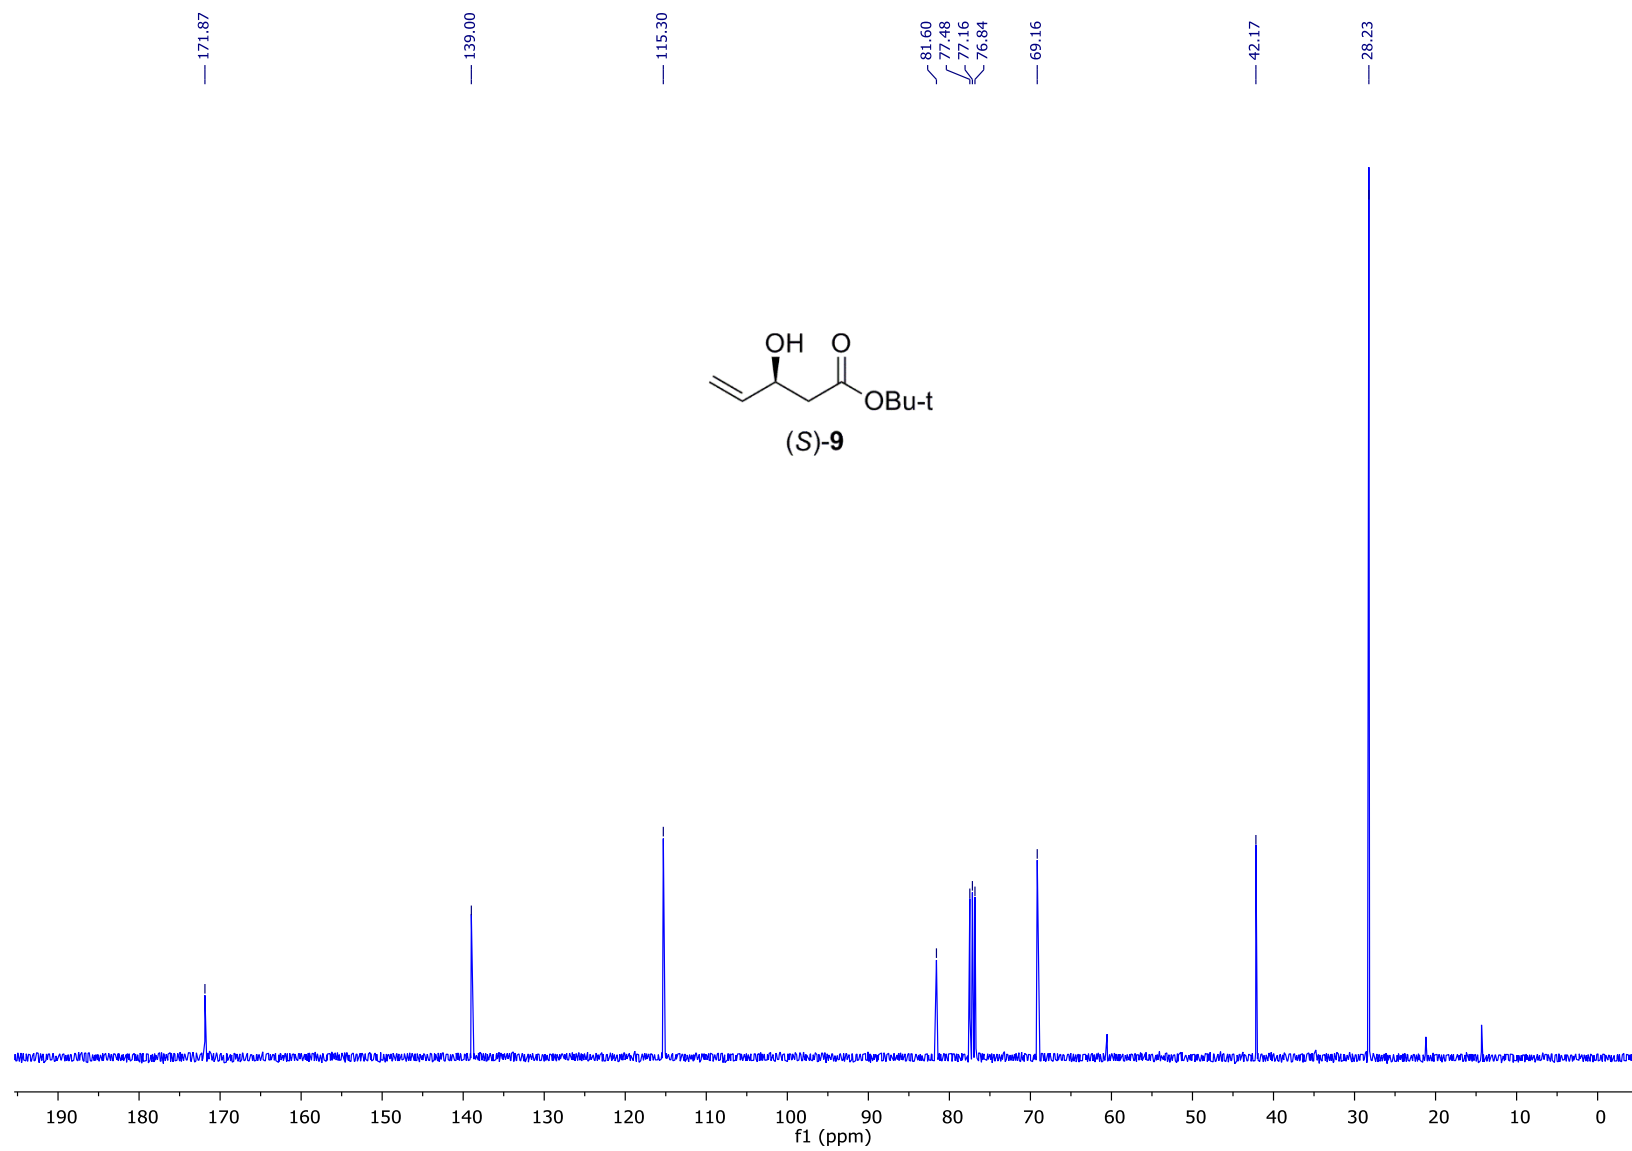





**Figure S33.**  $^{13}\text{C}$  NMR Spectrum of **33** in  $\text{CDCl}_3$  (100 MHz) at 25  $^\circ\text{C}$

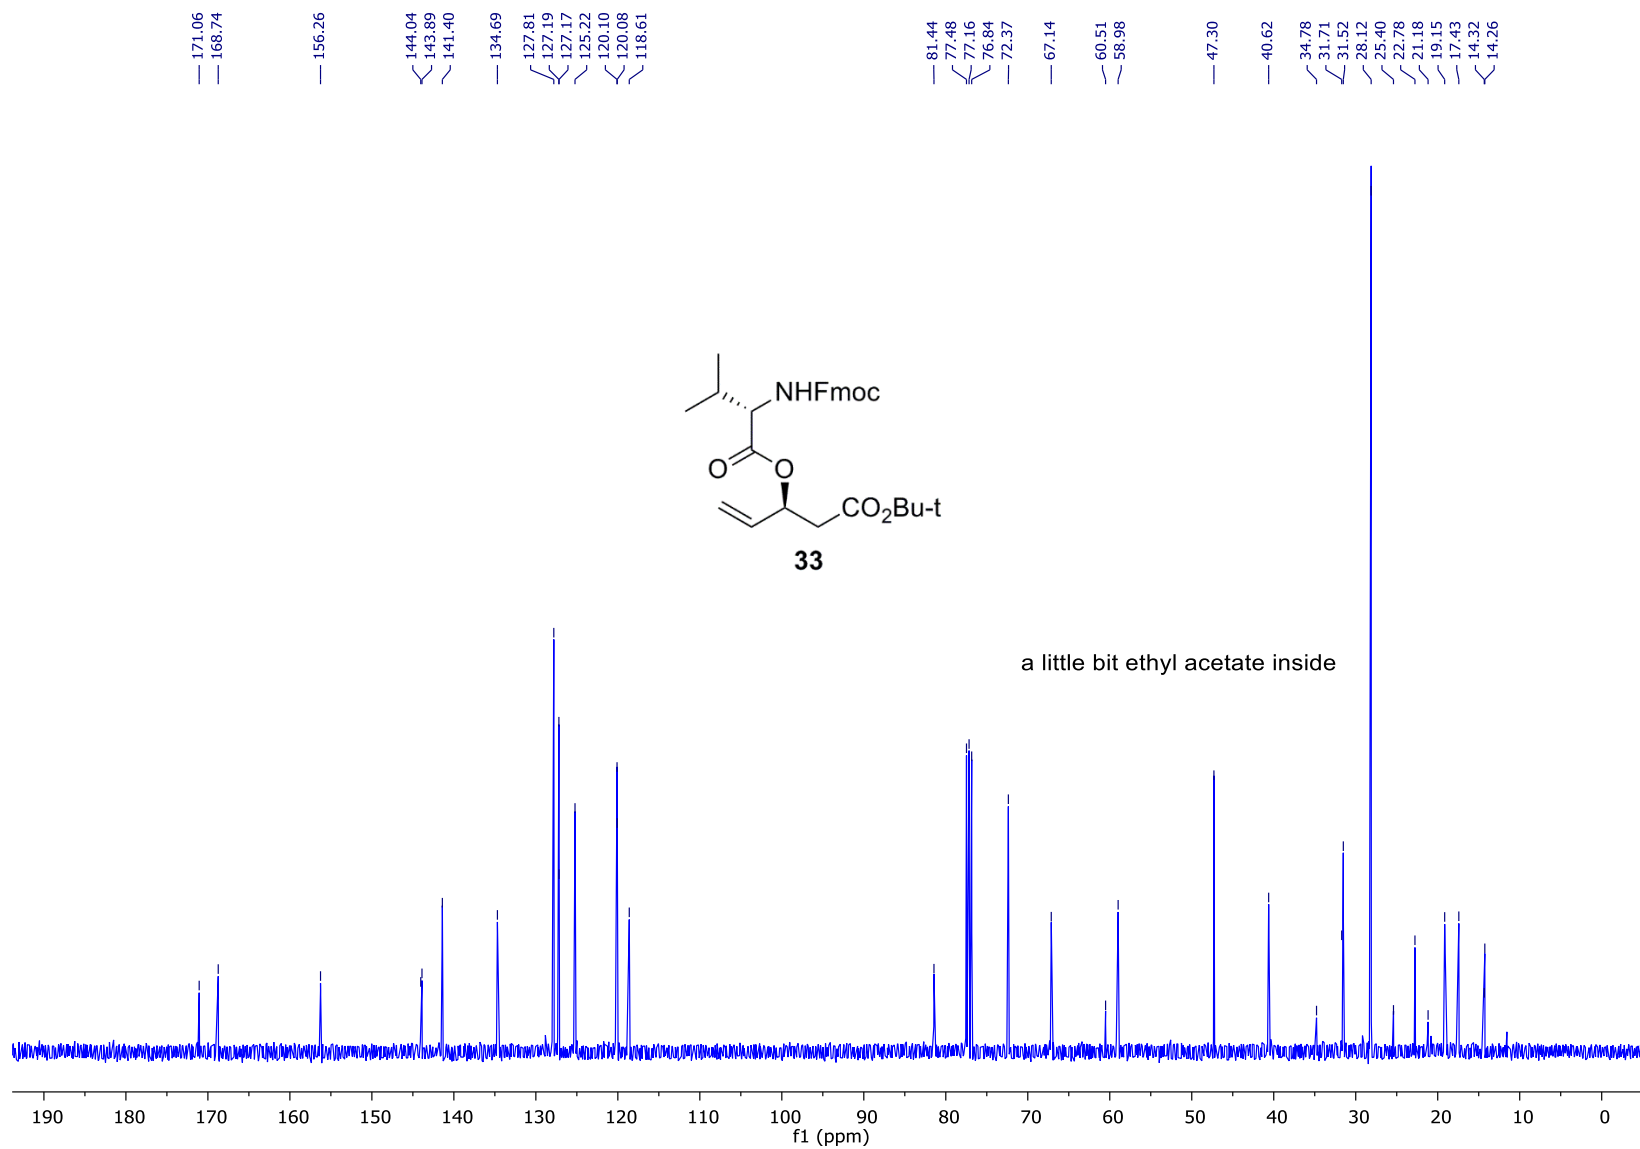

Figure S34. <sup>1</sup>H NMR Spectrum of **6** in CDCl<sub>3</sub> (400 MHz) at 25 °C

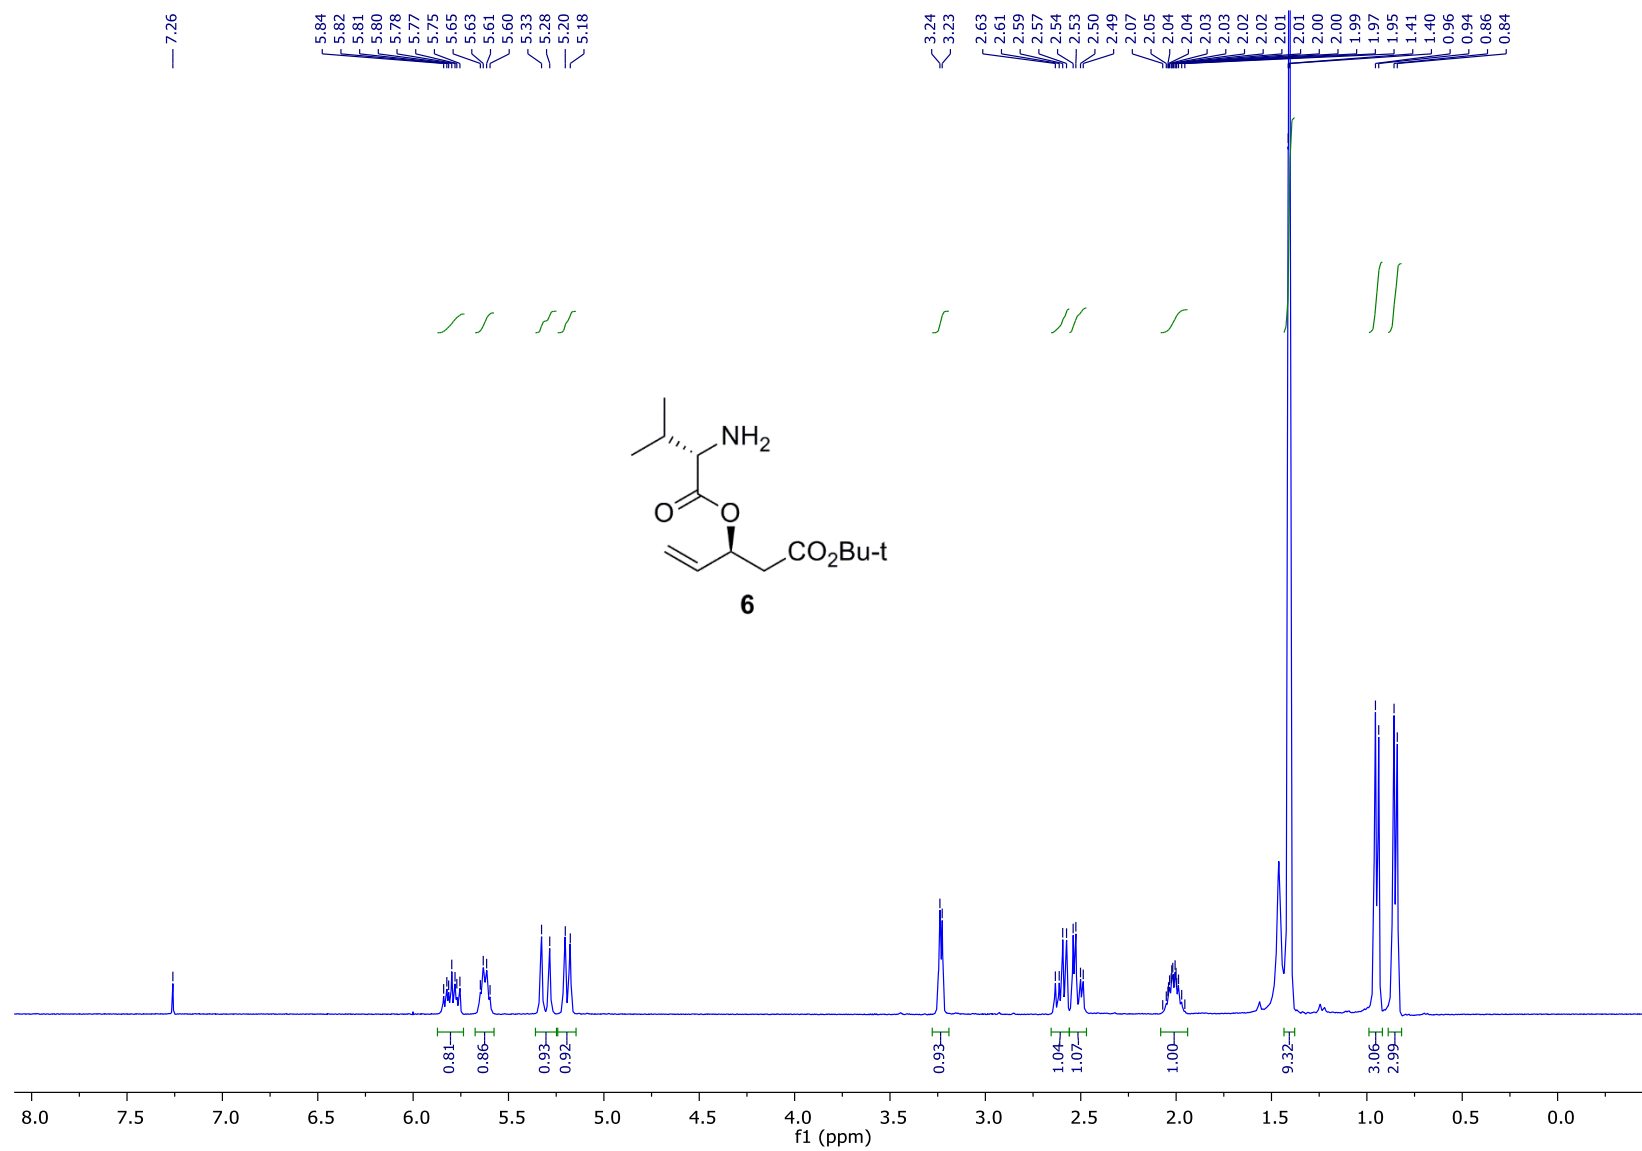

**Figure S35.**  $^{13}\text{C}$  NMR Spectrum of **6** in  $\text{CDCl}_3$  (100 MHz) at 25  $^\circ\text{C}$

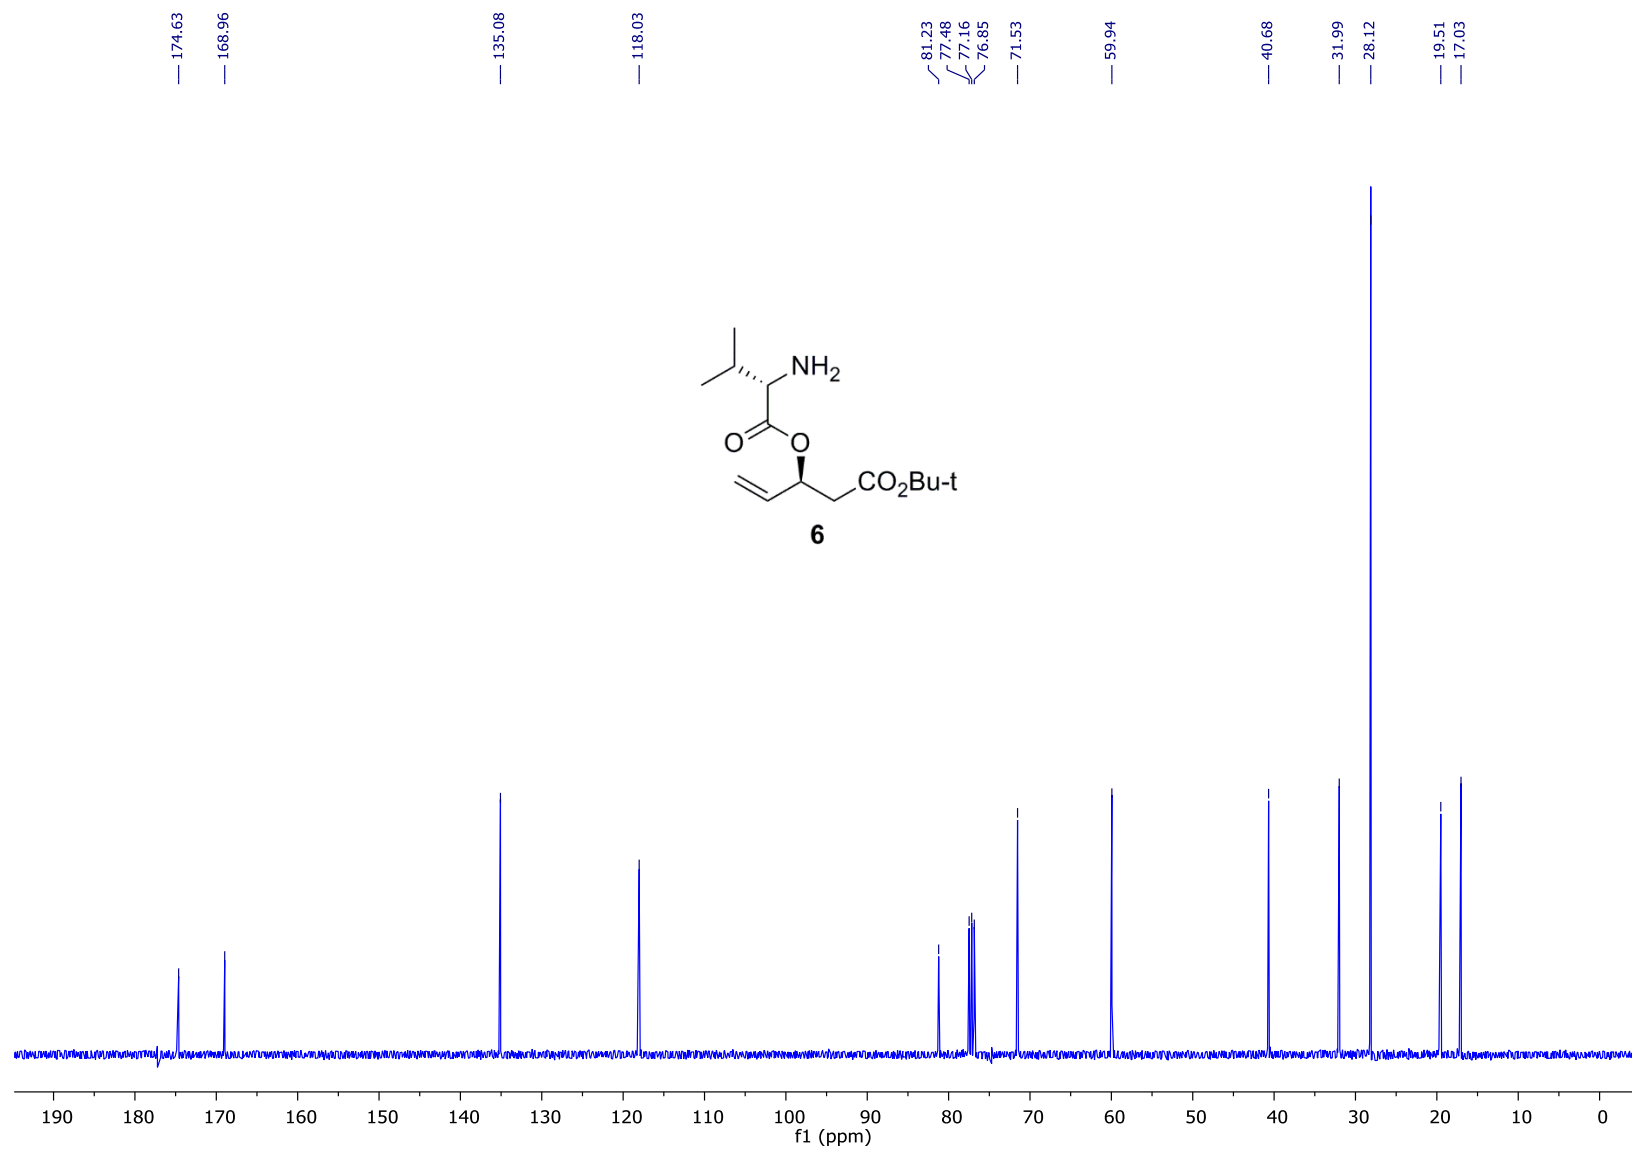

Figure S36. <sup>1</sup>H NMR Spectrum of **4** in CDCl<sub>3</sub> (400 MHz) at 25 °C

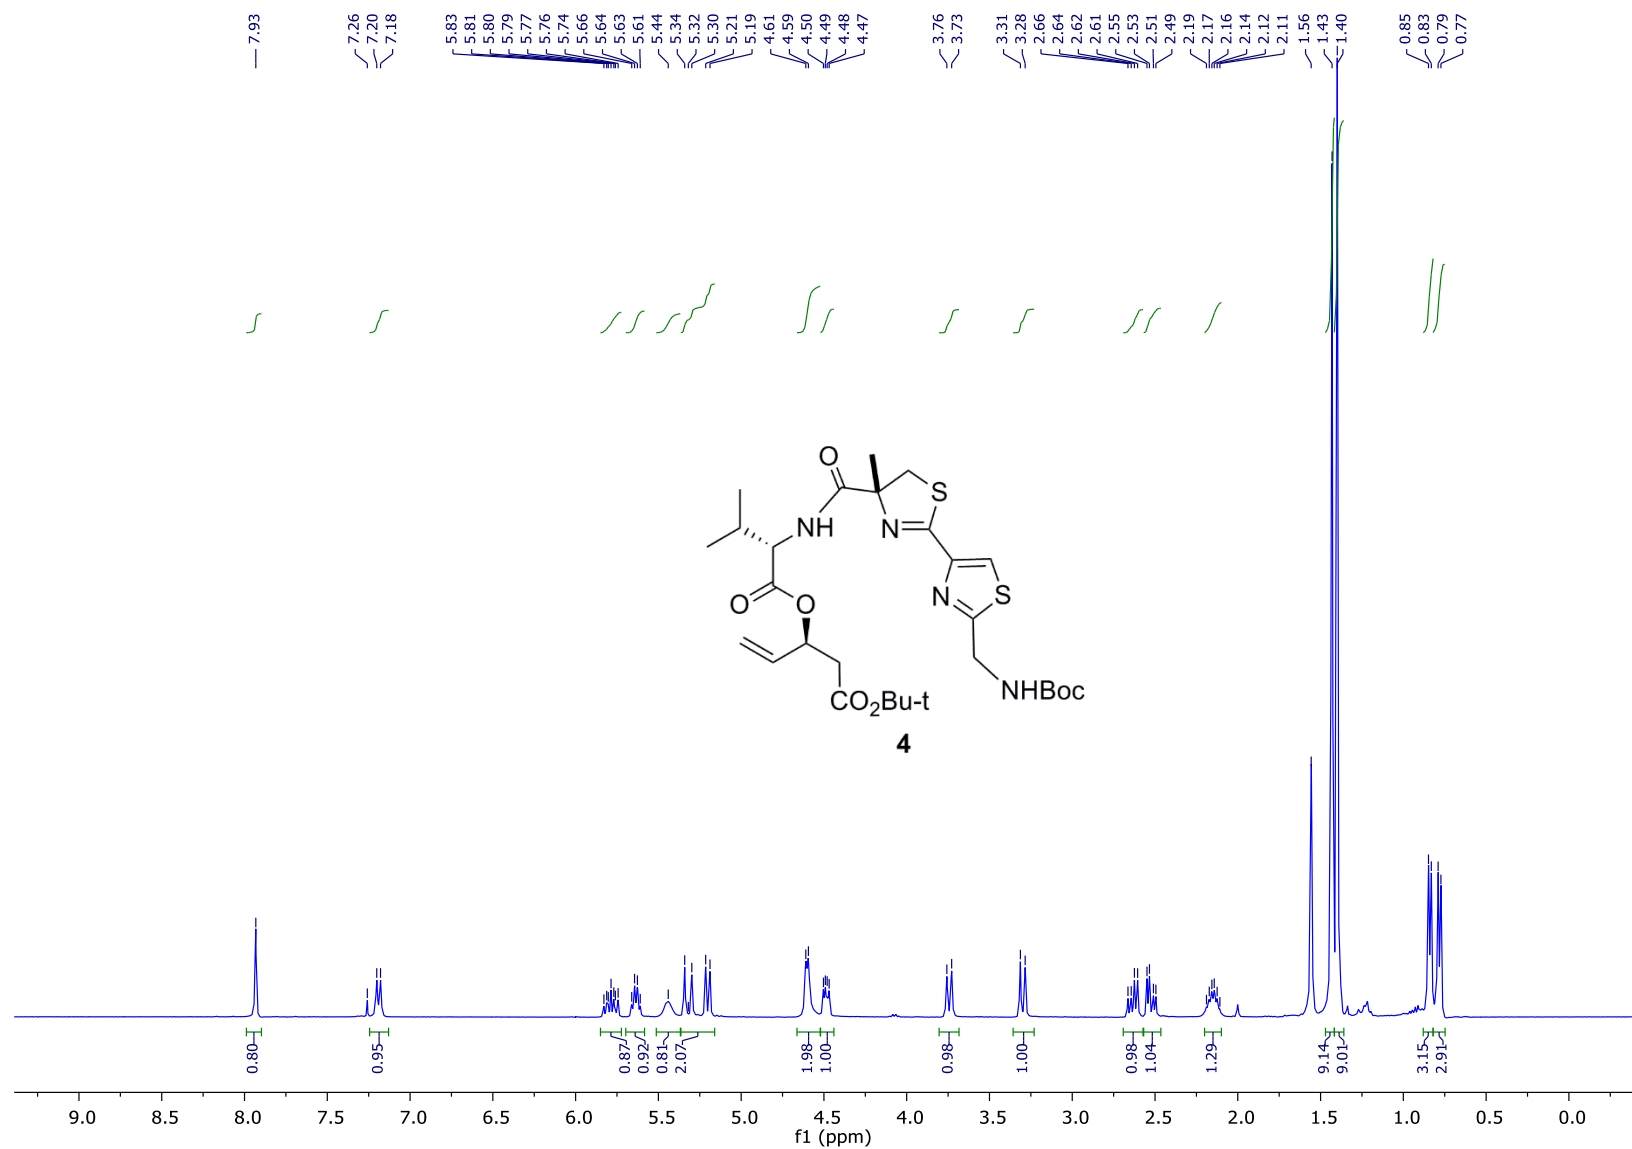

Figure S37.  $^{13}\text{C}$  NMR Spectrum of **4** in  $\text{CDCl}_3$  (100 MHz) at 25  $^\circ\text{C}$

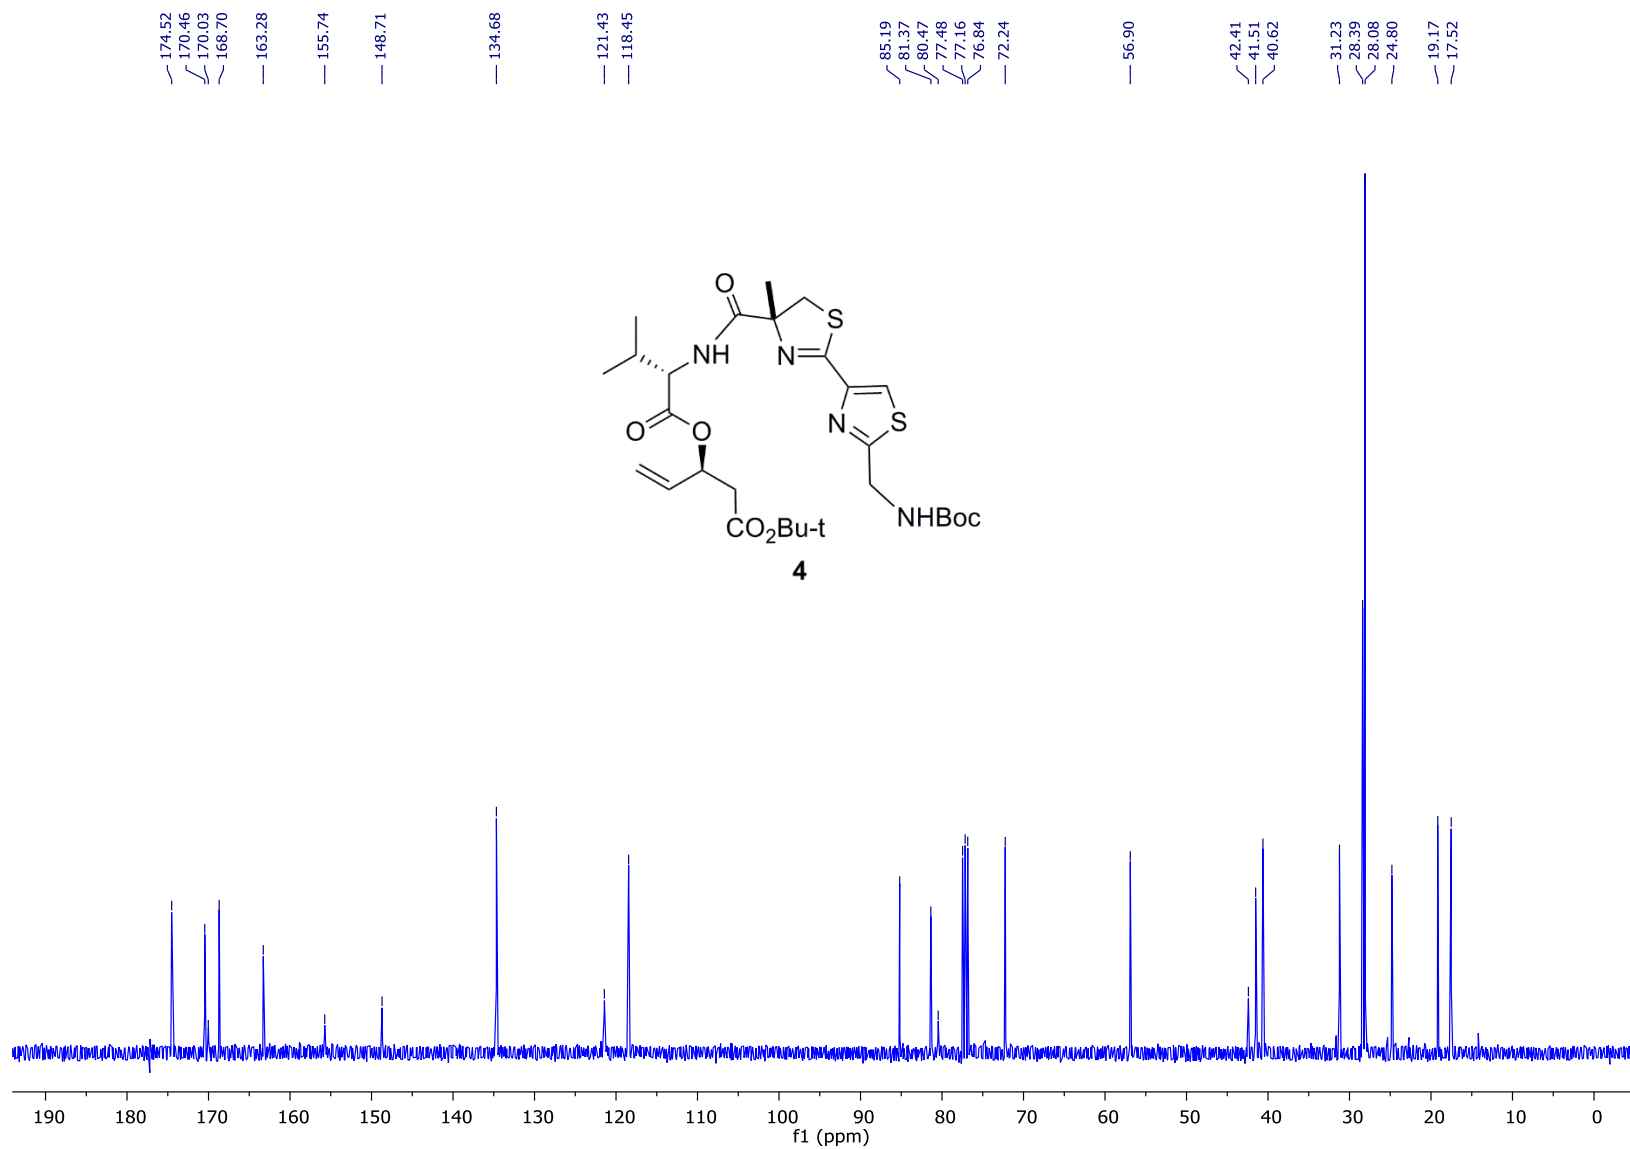



**Figure S39.**  $^{13}\text{C}$  NMR Spectrum of **3** in  $\text{CDCl}_3$  (100 MHz) at 25  $^\circ\text{C}$

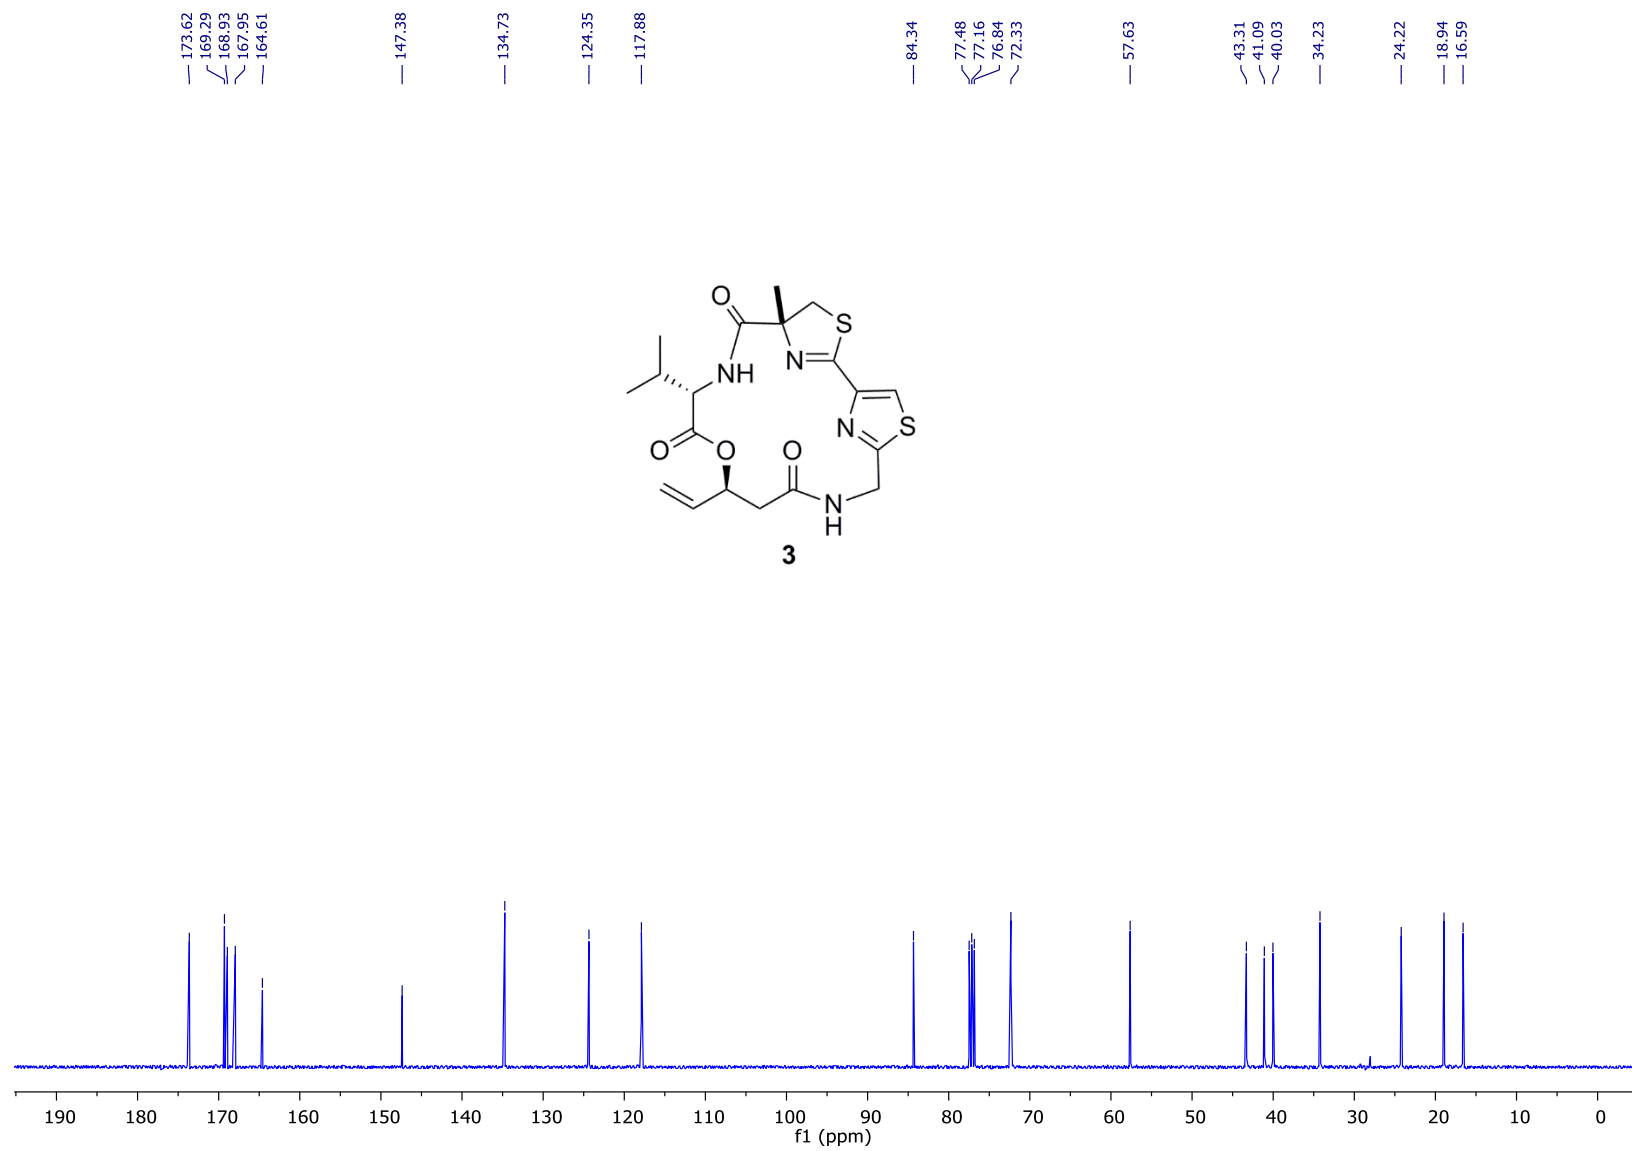



Figure S40.  $^1\text{H}$  NMR Spectrum of **1** in  $\text{CDCl}_3$  (600 MHz) at 25  $^\circ\text{C}$

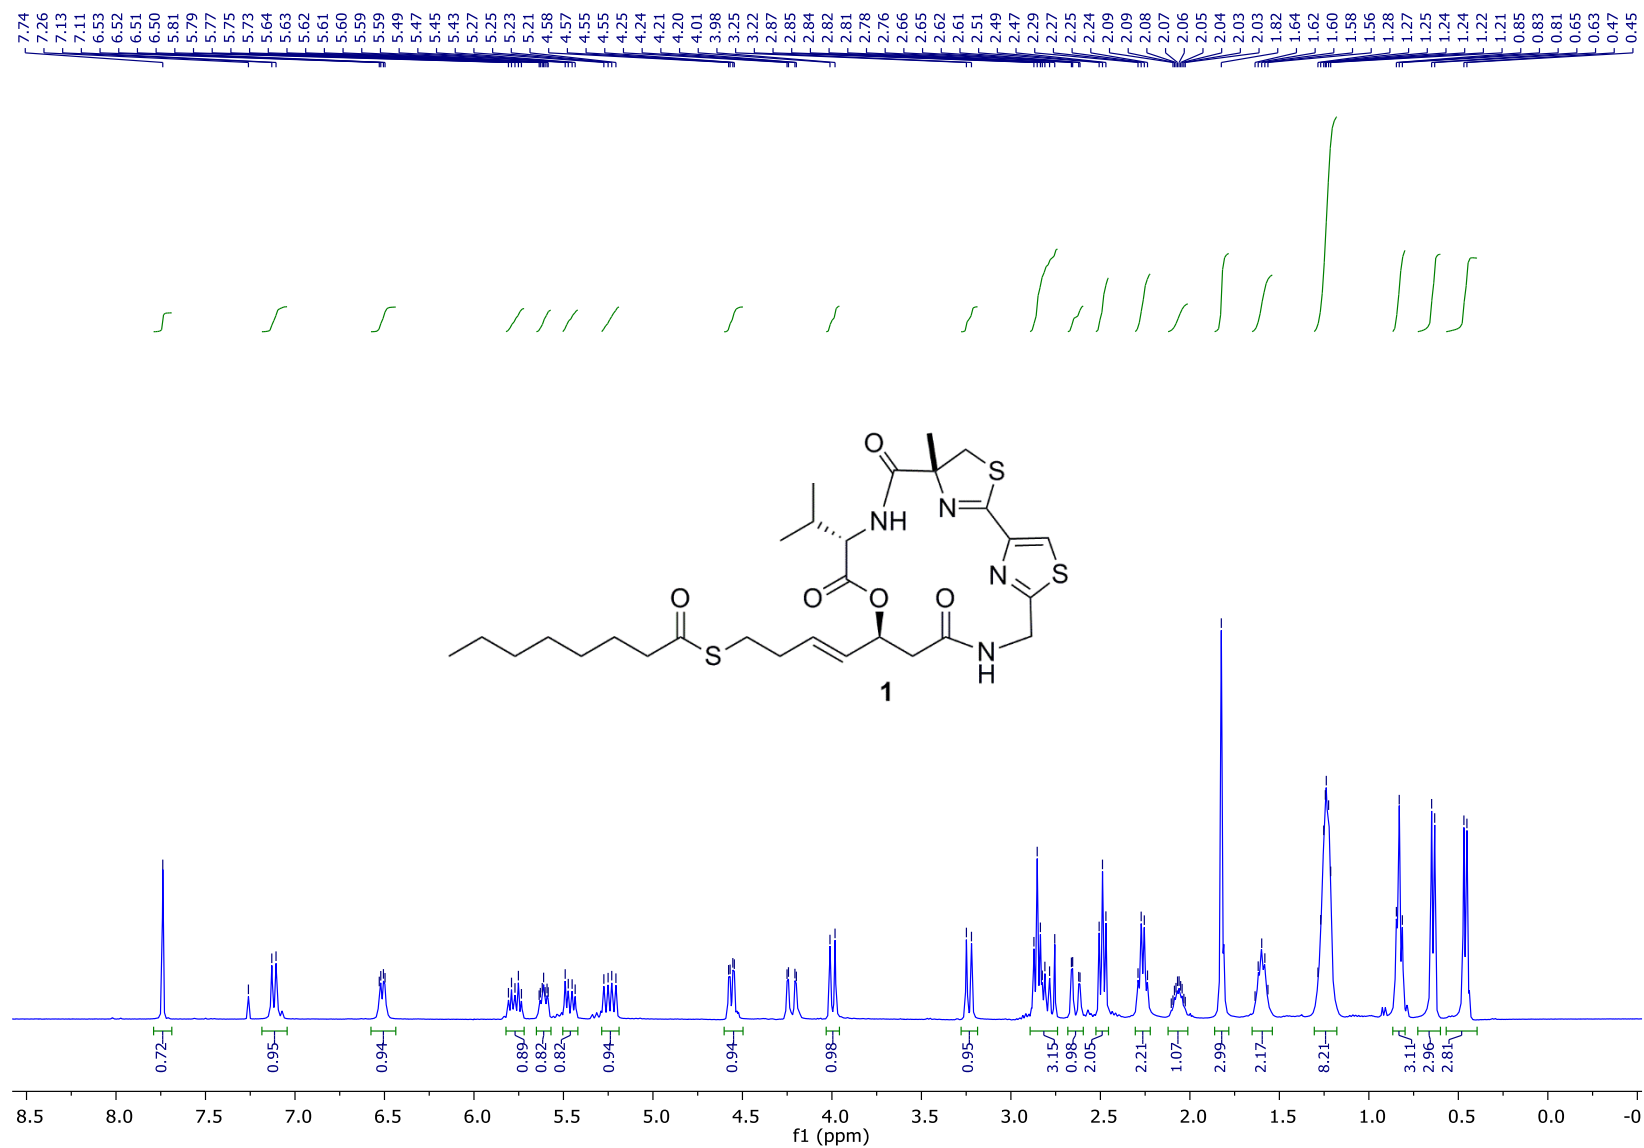

Figure S41.  $^{13}\text{C}$  NMR Spectrum of **1** in  $\text{CDCl}_3$  (150 MHz) at 25  $^\circ\text{C}$

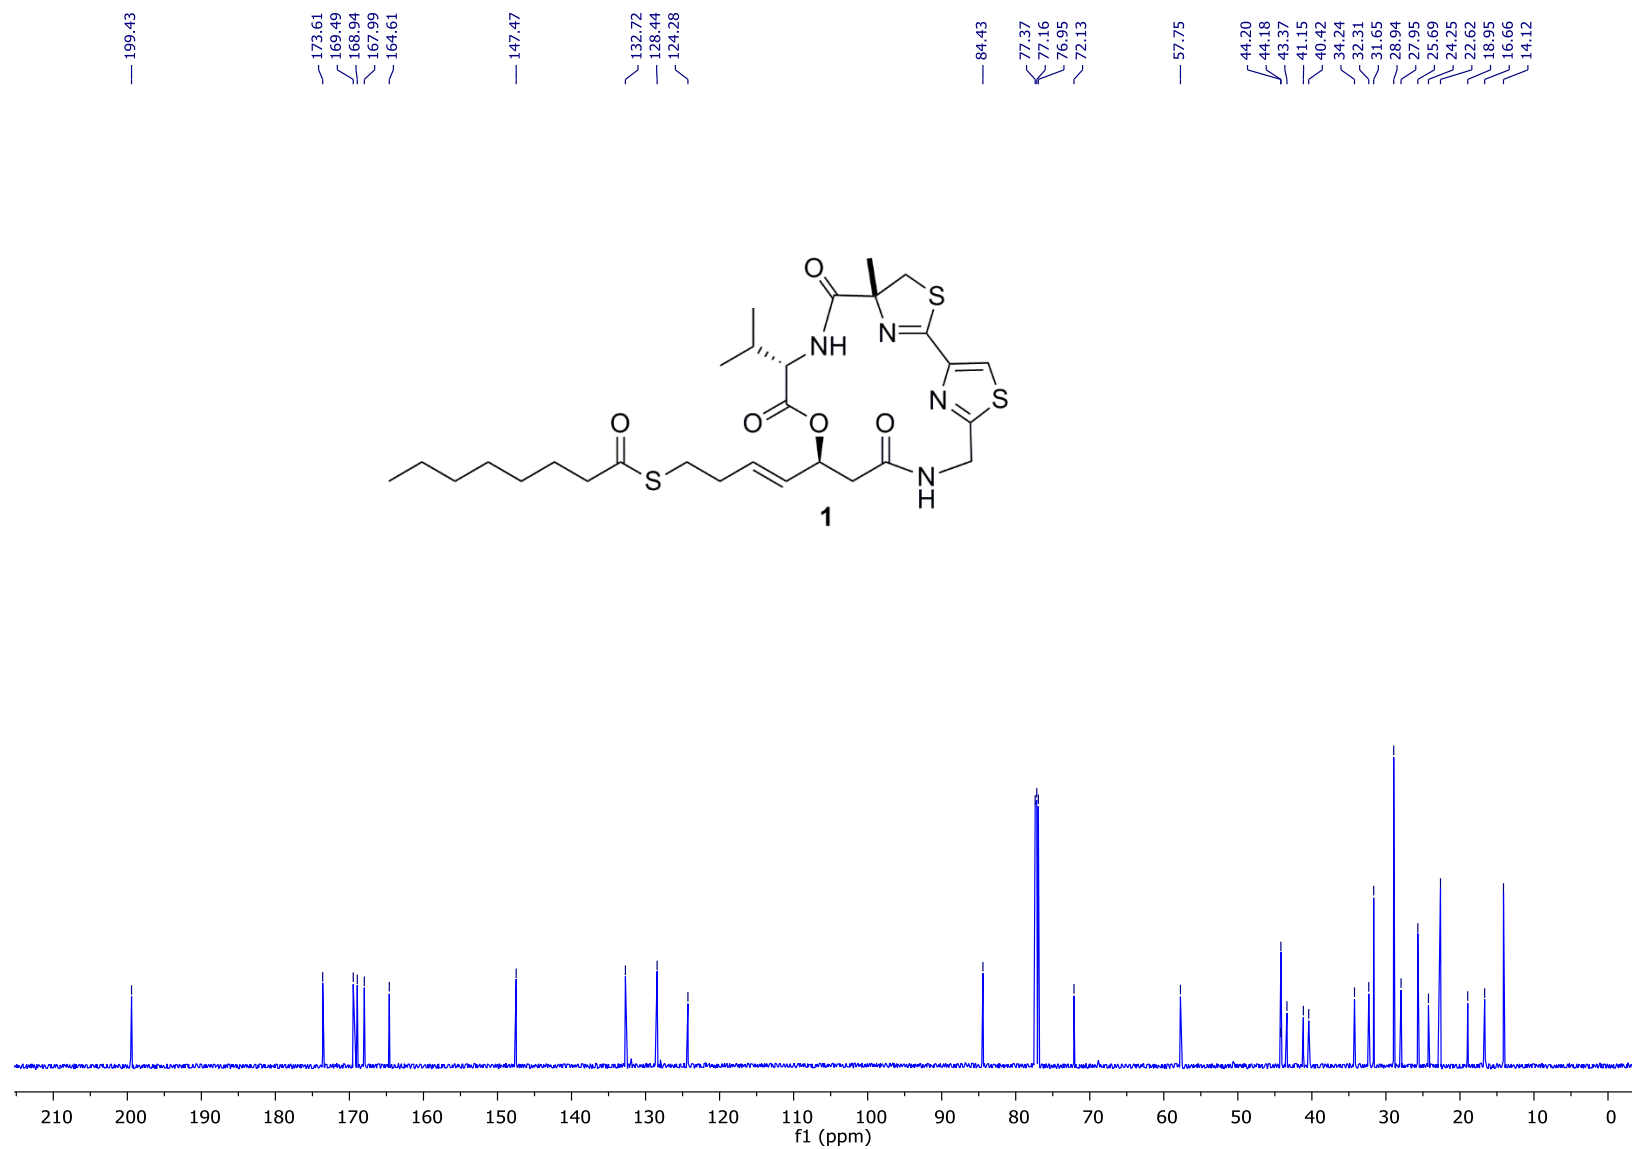

Supplement: NIHMS1900773-supplement-Supp_Info.pdf [file NIHMS1900773-supplement-Supp_Info.pdf]
